# Supplementary material for: Oxidized phospholipids regulate amino acid metabolism through MTHFD2 to facilitate nucleotide release in endothelial cells
Source: Nat Commun. 2018 Jun 12;9:2292. doi: 10.1038/s41467-018-04602-0 (PMC5997752; doi:10.1038/s41467-018-04602-0)
Supplement: Supplementary file 3 — Supplementary Data 1 [file 41467_2018_4602_MOESM3_ESM.xlsx]

## Sheet: Edge_table_control_Bayesian_net
SUID	interaction	name	selected	shared interaction	shared name
64	int	DDR1 (int) KIAA0922	false	int	DDR1 (int) KIAA0922
66	int	DDR1 (int) MYH10	false	int	DDR1 (int) MYH10
69	int	UBA7 (int) UBE2L6	false	int	UBA7 (int) UBE2L6
71	int	UBA7 (int) WSB2	false	int	UBA7 (int) WSB2
73	int	UBA7 (int) PSMB9	false	int	UBA7 (int) PSMB9
75	int	UBA7 (int) SETD8	false	int	UBA7 (int) SETD8
78	int	GAS6 (int) FADS3	false	int	GAS6 (int) FADS3
80	int	GAS6 (int) PLLP	false	int	GAS6 (int) PLLP
83	int	MMP14 (int) KLF9	false	int	MMP14 (int) KLF9
86	int	MYST2 (int) PPM1D	false	int	MYST2 (int) PPM1D
89	int	HNRNPM (int) C1orf107	false	int	HNRNPM (int) C1orf107
92	int	PRKAR1A (int) CNOT8	false	int	PRKAR1A (int) CNOT8
94	int	PRKAR1A (int) COPA	false	int	PRKAR1A (int) COPA
96	int	PRKAR1A (int) NDRG3	false	int	PRKAR1A (int) NDRG3
99	int	RAD21 (int) SMC3	false	int	RAD21 (int) SMC3
102	int	MLEC (int) PRRC1	false	int	MLEC (int) PRRC1
105	int	WARS (int) PIK3CG	false	int	WARS (int) PIK3CG
108	int	NDRG1 (int) NPAS2	false	int	NDRG1 (int) NPAS2
110	int	NDRG1 (int) FBXW7	false	int	NDRG1 (int) FBXW7
113	int	PTPRF (int) GLCE	false	int	PTPRF (int) GLCE
116	int	YWHAZ (int) LANCL1	false	int	YWHAZ (int) LANCL1
118	int	YWHAZ (int) PRKACB	false	int	YWHAZ (int) PRKACB
120	int	YWHAZ (int) CAPN7	false	int	YWHAZ (int) CAPN7
122	int	YWHAZ (int) RAB5A	false	int	YWHAZ (int) RAB5A
124	int	YWHAZ (int) ANAPC5	false	int	YWHAZ (int) ANAPC5
126	int	YWHAZ (int) GTF2I	false	int	YWHAZ (int) GTF2I
128	int	YWHAZ (int) ADD1	false	int	YWHAZ (int) ADD1
130	int	YWHAZ (int) MTMR1	false	int	YWHAZ (int) MTMR1
132	int	YWHAZ (int) EML4	false	int	YWHAZ (int) EML4
135	int	GLUL (int) AIP	false	int	GLUL (int) AIP
137	int	GLUL (int) C1orf144	false	int	GLUL (int) C1orf144
139	int	GLUL (int) UBE4B	false	int	GLUL (int) UBE4B
142	int	PHB (int) UTP20	false	int	PHB (int) UTP20
144	int	PHB (int) PILRB	false	int	PHB (int) PILRB
147	int	CTSA (int) CTSD	false	int	CTSA (int) CTSD
150	int	DNAJB1 (int) TAOK2	false	int	DNAJB1 (int) TAOK2
152	int	DNAJB1 (int) C5orf54	false	int	DNAJB1 (int) C5orf54
155	int	XBP1 (int) ALG6	false	int	XBP1 (int) ALG6
158	int	UBE2L3 (int) THAP10	false	int	UBE2L3 (int) THAP10
160	int	GRN (int) CTSA	false	int	GRN (int) CTSA
162	int	GRN (int) CTSB	false	int	GRN (int) CTSB
164	int	GRN (int) PSAP	false	int	GRN (int) PSAP
166	int	GRN (int) GLB1	false	int	GRN (int) GLB1
168	int	GRN (int) RALGDS	false	int	GRN (int) RALGDS
170	int	GRN (int) MAN2B1	false	int	GRN (int) MAN2B1
172	int	GRN (int) GNS	false	int	GRN (int) GNS
174	int	GRN (int) MAN2B2	false	int	GRN (int) MAN2B2
177	int	GSN (int) SORBS2	false	int	GSN (int) SORBS2
179	int	GSN (int) NPM3	false	int	GSN (int) NPM3
181	int	GSN (int) LETMD1	false	int	GSN (int) LETMD1
184	int	OS9 (int) NUCB1	false	int	OS9 (int) NUCB1
187	int	CAPRIN1 (int) CRK	false	int	CAPRIN1 (int) CRK
189	int	CAPRIN1 (int) GNA13	false	int	CAPRIN1 (int) GNA13
191	int	CAPRIN1 (int) RNF6	false	int	CAPRIN1 (int) RNF6
193	int	CAPRIN1 (int) PTPN12	false	int	CAPRIN1 (int) PTPN12
195	int	CAPRIN1 (int) ALG13	false	int	CAPRIN1 (int) ALG13
197	int	CAPRIN1 (int) CUEDC1	false	int	CAPRIN1 (int) CUEDC1
200	int	PTP4A1 (int) MAP3K11	false	int	PTP4A1 (int) MAP3K11
202	int	PTP4A1 (int) PLEKHO2	false	int	PTP4A1 (int) PLEKHO2
204	int	PTP4A1 (int) AHDC1	false	int	PTP4A1 (int) AHDC1
206	int	PTP4A1 (int) SCAMP4	false	int	PTP4A1 (int) SCAMP4
208	int	PTP4A1 (int) STRN3	false	int	PTP4A1 (int) STRN3
210	int	PTP4A1 (int) FAM176B	false	int	PTP4A1 (int) FAM176B
212	int	PTP4A1 (int) AKAP13	false	int	PTP4A1 (int) AKAP13
214	int	PTP4A1 (int) FAM3A	false	int	PTP4A1 (int) FAM3A
216	int	PTP4A1 (int) CLCN7	false	int	PTP4A1 (int) CLCN7
218	int	PTP4A1 (int) MED16	false	int	PTP4A1 (int) MED16
220	int	TPP1 (int) GRN	false	int	TPP1 (int) GRN
221	int	TPP1 (int) OS9	false	int	TPP1 (int) OS9
223	int	TPP1 (int) HLA-E	false	int	TPP1 (int) HLA-E
225	int	TPP1 (int) LRRFIP1	false	int	TPP1 (int) LRRFIP1
227	int	TPP1 (int) LAMP2	false	int	TPP1 (int) LAMP2
229	int	TPP1 (int) PPIH	false	int	TPP1 (int) PPIH
231	int	TPP1 (int) TAPBP	false	int	TPP1 (int) TAPBP
233	int	TPP1 (int) PAM	false	int	TPP1 (int) PAM
235	int	TPP1 (int) FTH1	false	int	TPP1 (int) FTH1
237	int	TPP1 (int) EDEM2	false	int	TPP1 (int) EDEM2
239	int	TPP1 (int) LRRFIP2	false	int	TPP1 (int) LRRFIP2
241	int	TPP1 (int) HS1BP3	false	int	TPP1 (int) HS1BP3
243	int	TPP1 (int) KLHL7	false	int	TPP1 (int) KLHL7
245	int	TPP1 (int) FAM35A	false	int	TPP1 (int) FAM35A
247	int	TPP1 (int) TMEM8A	false	int	TPP1 (int) TMEM8A
250	int	CALU (int) P4HA1	false	int	CALU (int) P4HA1
253	int	DPYSL2 (int) INPP5D	false	int	DPYSL2 (int) INPP5D
255	int	DPYSL2 (int) PDE2A	false	int	DPYSL2 (int) PDE2A
257	int	DPYSL2 (int) PHKA1	false	int	DPYSL2 (int) PHKA1
259	int	DPYSL2 (int) TNFSF12	false	int	DPYSL2 (int) TNFSF12
261	int	DPYSL2 (int) PNMA2	false	int	DPYSL2 (int) PNMA2
263	int	DPYSL2 (int) SNED1	false	int	DPYSL2 (int) SNED1
265	int	DPYSL2 (int) FKBP11	false	int	DPYSL2 (int) FKBP11
267	int	DPYSL2 (int) BNIP3L	false	int	DPYSL2 (int) BNIP3L
270	int	MAT2A (int) ARNTL2	false	int	MAT2A (int) ARNTL2
273	int	BZW1 (int) RNGTT	false	int	BZW1 (int) RNGTT
276	int	ODC1 (int) TIMM8A	false	int	ODC1 (int) TIMM8A
279	int	MCL1 (int) NBN	false	int	MCL1 (int) NBN
281	int	MCL1 (int) RRAS2	false	int	MCL1 (int) RRAS2
283	int	MCL1 (int) RIT1	false	int	MCL1 (int) RIT1
285	int	MCL1 (int) OSTM1	false	int	MCL1 (int) OSTM1
287	int	MCL1 (int) C10orf88	false	int	MCL1 (int) C10orf88
289	int	HSPA1A (int) DNAJB1	false	int	HSPA1A (int) DNAJB1
291	int	HSPA1A (int) CDC42EP3	false	int	HSPA1A (int) CDC42EP3
293	int	HSPA1A (int) SLC5A3	false	int	HSPA1A (int) SLC5A3
295	int	HSPA1A (int) PIGL	false	int	HSPA1A (int) PIGL
297	int	HSPA1A (int) GFOD2	false	int	HSPA1A (int) GFOD2
299	int	HSPA1A (int) BNC2	false	int	HSPA1A (int) BNC2
301	int	HSPA1A (int) MIS12	false	int	HSPA1A (int) MIS12
304	int	TMBIM6 (int) DKFZp434H1419	false	int	TMBIM6 (int) DKFZp434H1419
307	int	HSPD1 (int) PPID	false	int	HSPD1 (int) PPID
310	int	CIRBP (int) ATP5S	false	int	CIRBP (int) ATP5S
313	int	PLOD1 (int) LGMN	false	int	PLOD1 (int) LGMN
315	int	PLOD1 (int) UXS1	false	int	PLOD1 (int) UXS1
317	int	PLOD1 (int) LEPRE1	false	int	PLOD1 (int) LEPRE1
319	int	CTSB (int) LAMP1	false	int	CTSB (int) LAMP1
322	int	EPRS (int) PRPF6	false	int	EPRS (int) PRPF6
325	int	NOP56 (int) PPIF	false	int	NOP56 (int) PPIF
327	int	NOP56 (int) GBA	false	int	NOP56 (int) GBA
329	int	NOP56 (int) ESF1	false	int	NOP56 (int) ESF1
331	int	NOP56 (int) Magmas	false	int	NOP56 (int) Magmas
333	int	NOP56 (int) POLR1E	false	int	NOP56 (int) POLR1E
336	int	EPAS1 (int) JUNB	false	int	EPAS1 (int) JUNB
338	int	EPAS1 (int) TPD52L1	false	int	EPAS1 (int) TPD52L1
340	int	EPAS1 (int) ATP10D	false	int	EPAS1 (int) ATP10D
342	int	EPAS1 (int) MMRN2	false	int	EPAS1 (int) MMRN2
345	int	SSR1 (int) HSPA13	false	int	SSR1 (int) HSPA13
347	int	SSR1 (int) SPCS3	false	int	SSR1 (int) SPCS3
350	int	TRA2B (int) IPO5	false	int	TRA2B (int) IPO5
352	int	TRA2B (int) LMF1	false	int	TRA2B (int) LMF1
355	int	PALLD (int) NETO2	false	int	PALLD (int) NETO2
358	int	MGEA5 (int) EXOSC4	false	int	MGEA5 (int) EXOSC4
361	int	BTG1 (int) IGFBP4	false	int	BTG1 (int) IGFBP4
363	int	BTG1 (int) WWTR1	false	int	BTG1 (int) WWTR1
365	int	BTG1 (int) LTA4H	false	int	BTG1 (int) LTA4H
368	int	DEK (int) SAFB	false	int	DEK (int) SAFB
370	int	DEK (int) TOPBP1	false	int	DEK (int) TOPBP1
373	int	TSPAN3 (int) MBTPS1	false	int	TSPAN3 (int) MBTPS1
376	int	ACTA2 (int) CRELD1	false	int	ACTA2 (int) CRELD1
379	int	CKAP4 (int) RNF38	false	int	CKAP4 (int) RNF38
382	int	PAICS (int) TMPO	false	int	PAICS (int) TMPO
384	int	PAICS (int) PINK1	false	int	PAICS (int) PINK1
386	int	PAICS (int) SIP1	false	int	PAICS (int) SIP1
388	int	PAICS (int) TSR1	false	int	PAICS (int) TSR1
391	int	ADD3 (int) SEMA3F	false	int	ADD3 (int) SEMA3F
394	int	DUSP1 (int) STARD13	false	int	DUSP1 (int) STARD13
397	int	PLD3 (int) EFNA4	false	int	PLD3 (int) EFNA4
400	int	MYL9 (int) LOXL1	false	int	MYL9 (int) LOXL1
402	int	MYL9 (int) TPM2	false	int	MYL9 (int) TPM2
404	int	MYL9 (int) TAGLN	false	int	MYL9 (int) TAGLN
407	int	MMP2 (int) HTRA1	false	int	MMP2 (int) HTRA1
409	int	MMP2 (int) SOX4	false	int	MMP2 (int) SOX4
411	int	MMP2 (int) ARL4C	false	int	MMP2 (int) ARL4C
413	int	MMP2 (int) SPOCK1	false	int	MMP2 (int) SPOCK1
415	int	MMP2 (int) TRAM2	false	int	MMP2 (int) TRAM2
417	int	MMP2 (int) DLG1	false	int	MMP2 (int) DLG1
419	int	MMP2 (int) HES1	false	int	MMP2 (int) HES1
421	int	MMP2 (int) COBLL1	false	int	MMP2 (int) COBLL1
423	int	MMP2 (int) BMP2	false	int	MMP2 (int) BMP2
425	int	MMP2 (int) PCDH7	false	int	MMP2 (int) PCDH7
427	int	MMP2 (int) KHDRBS3	false	int	MMP2 (int) KHDRBS3
429	int	MMP2 (int) DHRS7	false	int	MMP2 (int) DHRS7
431	int	MMP2 (int) SPSB1	false	int	MMP2 (int) SPSB1
433	int	MMP2 (int) GPR124	false	int	MMP2 (int) GPR124
435	int	MMP2 (int) SH3BP4	false	int	MMP2 (int) SH3BP4
437	int	MMP2 (int) TLE2	false	int	MMP2 (int) TLE2
440	int	SF3B1 (int) ZC3H11A	false	int	SF3B1 (int) ZC3H11A
442	int	SF3B1 (int) ELF1	false	int	SF3B1 (int) ELF1
444	int	SF3B1 (int) SMC5	false	int	SF3B1 (int) SMC5
446	int	SF3B1 (int) PPFIBP1	false	int	SF3B1 (int) PPFIBP1
449	int	SMARCC1 (int) CHD4	false	int	SMARCC1 (int) CHD4
451	int	SMARCC1 (int) AP3D1	false	int	SMARCC1 (int) AP3D1
453	int	SMARCC1 (int) OSBPL1A	false	int	SMARCC1 (int) OSBPL1A
455	int	SMARCC1 (int) NEK1	false	int	SMARCC1 (int) NEK1
457	int	SMARCC1 (int) SFRS2IP	false	int	SMARCC1 (int) SFRS2IP
459	int	SMARCC1 (int) EEF1D	false	int	SMARCC1 (int) EEF1D
461	int	SMARCC1 (int) MYO10	false	int	SMARCC1 (int) MYO10
463	int	SMARCC1 (int) UBE2O	false	int	SMARCC1 (int) UBE2O
466	int	TM9SF2 (int) MFSD1	false	int	TM9SF2 (int) MFSD1
468	int	TM9SF2 (int) ITFG1	false	int	TM9SF2 (int) ITFG1
471	int	MBNL1 (int) SEPT11	false	int	MBNL1 (int) SEPT11
473	int	MBNL1 (int) SYNPO	false	int	MBNL1 (int) SYNPO
475	int	MBNL1 (int) PRKD3	false	int	MBNL1 (int) PRKD3
477	int	MBNL1 (int) ANKRD12	false	int	MBNL1 (int) ANKRD12
480	int	ARHGDIA (int) SORBS3	false	int	ARHGDIA (int) SORBS3
483	int	BHLHE40 (int) HRH1	false	int	BHLHE40 (int) HRH1
486	int	LRPAP1 (int) EIF1AY	false	int	LRPAP1 (int) EIF1AY
489	int	SLC7A5 (int) AEBP1	false	int	SLC7A5 (int) AEBP1
491	int	SLC7A5 (int) SLC1A5	false	int	SLC7A5 (int) SLC1A5
494	int	PCNA (int) ATAD2	false	int	PCNA (int) ATAD2
497	int	DDX3X (int) CDC5L	false	int	DDX3X (int) CDC5L
499	int	DDX3X (int) STIP1	false	int	DDX3X (int) STIP1
501	int	DDX3X (int) IDE	false	int	DDX3X (int) IDE
504	int	BTG2 (int) STX3	false	int	BTG2 (int) STX3
506	int	BTG2 (int) PHLDA1	false	int	BTG2 (int) PHLDA1
508	int	BTG2 (int) SESN1	false	int	BTG2 (int) SESN1
511	int	ATP1B1 (int) TFEC	false	int	ATP1B1 (int) TFEC
513	int	ATP1B1 (int) ABCG2	false	int	ATP1B1 (int) ABCG2
516	int	SYPL1 (int) RDX	false	int	SYPL1 (int) RDX
518	int	SYPL1 (int) ZNF227	false	int	SYPL1 (int) ZNF227
520	int	SYPL1 (int) COMMD10	false	int	SYPL1 (int) COMMD10
522	int	SYPL1 (int) EIF4B	false	int	SYPL1 (int) EIF4B
525	int	PSMC3 (int) SHMT1	false	int	PSMC3 (int) SHMT1
527	int	PSMC3 (int) MAPK8IP3	false	int	PSMC3 (int) MAPK8IP3
529	int	PSMC3 (int) ABCC10	false	int	PSMC3 (int) ABCC10
531	int	PSMC3 (int) PIGZ	false	int	PSMC3 (int) PIGZ
534	int	AKR1B1 (int) SCRN1	false	int	AKR1B1 (int) SCRN1
536	int	AKR1B1 (int) TPD52	false	int	AKR1B1 (int) TPD52
538	int	AKR1B1 (int) DCN	false	int	AKR1B1 (int) DCN
540	int	AKR1B1 (int) TRPV2	false	int	AKR1B1 (int) TRPV2
542	int	AKR1B1 (int) EMCN	false	int	AKR1B1 (int) EMCN
545	int	SDC1 (int) NTSR1	false	int	SDC1 (int) NTSR1
547	int	SDC1 (int) NTM	false	int	SDC1 (int) NTM
550	int	WSB1 (int) RPS6KA5	false	int	WSB1 (int) RPS6KA5
552	int	WSB1 (int) HSPA2	false	int	WSB1 (int) HSPA2
555	int	PRNP (int) OPN3	false	int	PRNP (int) OPN3
557	int	PRNP (int) PLVAP	false	int	PRNP (int) PLVAP
560	int	SH3BGRL (int) EFEMP1	false	int	SH3BGRL (int) EFEMP1
562	int	SH3BGRL (int) NNT	false	int	SH3BGRL (int) NNT
564	int	SH3BGRL (int) PPIC	false	int	SH3BGRL (int) PPIC
566	int	SH3BGRL (int) TEK	false	int	SH3BGRL (int) TEK
568	int	SH3BGRL (int) EIF2B3	false	int	SH3BGRL (int) EIF2B3
571	int	ENO2 (int) PRKCA	false	int	ENO2 (int) PRKCA
573	int	EBNA1BP2 (int) PHB	false	int	EBNA1BP2 (int) PHB
575	int	EBNA1BP2 (int) APEH	false	int	EBNA1BP2 (int) APEH
577	int	EBNA1BP2 (int) TUBG1	false	int	EBNA1BP2 (int) TUBG1
579	int	EBNA1BP2 (int) CLDN7	false	int	EBNA1BP2 (int) CLDN7
581	int	EBNA1BP2 (int) PDE4D	false	int	EBNA1BP2 (int) PDE4D
583	int	EBNA1BP2 (int) MED12	false	int	EBNA1BP2 (int) MED12
585	int	EBNA1BP2 (int) PAK1IP1	false	int	EBNA1BP2 (int) PAK1IP1
587	int	EBNA1BP2 (int) TBRG4	false	int	EBNA1BP2 (int) TBRG4
590	int	EMP1 (int) PLAGL1	false	int	EMP1 (int) PLAGL1
593	int	ETS2 (int) HPSE	false	int	ETS2 (int) HPSE
596	int	ENC1 (int) EFNA5	false	int	ENC1 (int) EFNA5
598	int	ENC1 (int) FLRT3	false	int	ENC1 (int) FLRT3
600	int	ENC1 (int) KLF13	false	int	ENC1 (int) KLF13
603	int	FLOT2 (int) MMD	false	int	FLOT2 (int) MMD
606	int	CST3 (int) IGFBP6	false	int	CST3 (int) IGFBP6
608	int	CST3 (int) RAB31	false	int	CST3 (int) RAB31
610	int	CST3 (int) RHBDF1	false	int	CST3 (int) RHBDF1
613	int	UBAP2L (int) PRKCDBP	false	int	UBAP2L (int) PRKCDBP
615	int	UBAP2L (int) C11orf67	false	int	UBAP2L (int) C11orf67
617	int	NBR1 (int) CKAP4	false	int	NBR1 (int) CKAP4
619	int	NBR1 (int) RALB	false	int	NBR1 (int) RALB
621	int	NBR1 (int) EHD2	false	int	NBR1 (int) EHD2
623	int	NBR1 (int) NFKB2	false	int	NBR1 (int) NFKB2
625	int	NBR1 (int) FAM49A	false	int	NBR1 (int) FAM49A
627	int	NBR1 (int) MYOF	false	int	NBR1 (int) MYOF
629	int	NBR1 (int) DICER1	false	int	NBR1 (int) DICER1
631	int	NBR1 (int) TJP1	false	int	NBR1 (int) TJP1
633	int	NBR1 (int) STX6	false	int	NBR1 (int) STX6
635	int	NBR1 (int) SEPT10	false	int	NBR1 (int) SEPT10
637	int	NBR1 (int) SRPK2	false	int	NBR1 (int) SRPK2
639	int	NBR1 (int) ARHGAP1	false	int	NBR1 (int) ARHGAP1
641	int	NBR1 (int) ADAM15	false	int	NBR1 (int) ADAM15
643	int	NBR1 (int) ADSS	false	int	NBR1 (int) ADSS
646	int	UCHL1 (int) POPDC3	false	int	UCHL1 (int) POPDC3
649	int	ITGA5 (int) SC65	false	int	ITGA5 (int) SC65
652	int	IGF2R (int) CDH5	false	int	IGF2R (int) CDH5
654	int	IGF2R (int) SERINC1	false	int	IGF2R (int) SERINC1
656	int	IGF2R (int) EIF2S2	false	int	IGF2R (int) EIF2S2
658	int	IGF2R (int) TMEM30A	false	int	IGF2R (int) TMEM30A
660	int	IGF2R (int) TMEM2	false	int	IGF2R (int) TMEM2
662	int	IGF2R (int) CCPG1	false	int	IGF2R (int) CCPG1
665	int	PHGDH (int) PCK2	false	int	PHGDH (int) PCK2
667	int	PHGDH (int) CBS	false	int	PHGDH (int) CBS
670	int	TRAM1 (int) TMED2	false	int	TRAM1 (int) TMED2
672	int	TRAM1 (int) DEGS1	false	int	TRAM1 (int) DEGS1
674	int	TRAM1 (int) PSEN1	false	int	TRAM1 (int) PSEN1
676	int	TRAM1 (int) CD164	false	int	TRAM1 (int) CD164
678	int	TRAM1 (int) CANX	false	int	TRAM1 (int) CANX
680	int	TRAM1 (int) UBXN4	false	int	TRAM1 (int) UBXN4
682	int	TRAM1 (int) NMD3	false	int	TRAM1 (int) NMD3
684	int	TRAM1 (int) CHMP1B	false	int	TRAM1 (int) CHMP1B
686	int	TRAM1 (int) TMCO3	false	int	TRAM1 (int) TMCO3
688	int	TRAM1 (int) EPS15L1	false	int	TRAM1 (int) EPS15L1
691	int	LRP10 (int) CYB5R1	false	int	LRP10 (int) CYB5R1
693	int	LRP10 (int) PNPLA6	false	int	LRP10 (int) PNPLA6
695	int	LRP10 (int) NCSTN	false	int	LRP10 (int) NCSTN
697	int	LRP10 (int) DNASE2	false	int	LRP10 (int) DNASE2
699	int	LRP10 (int) KLF4	false	int	LRP10 (int) KLF4
701	int	LRP10 (int) SDF4	false	int	LRP10 (int) SDF4
703	int	LRP10 (int) SGSH	false	int	LRP10 (int) SGSH
705	int	LRP10 (int) MAN1B1	false	int	LRP10 (int) MAN1B1
707	int	SOX4 (int) PTPRK	false	int	SOX4 (int) PTPRK
709	int	SOX4 (int) TRIO	false	int	SOX4 (int) TRIO
711	int	SOX4 (int) TSPAN6	false	int	SOX4 (int) TSPAN6
713	int	SOX4 (int) WDFY3	false	int	SOX4 (int) WDFY3
715	int	SOX4 (int) RHOBTB1	false	int	SOX4 (int) RHOBTB1
717	int	SOX4 (int) TULP4	false	int	SOX4 (int) TULP4
719	int	SOX4 (int) CERK	false	int	SOX4 (int) CERK
722	int	WDR77 (int) GGA2	false	int	WDR77 (int) GGA2
724	int	WDR77 (int) VPS13C	false	int	WDR77 (int) VPS13C
727	int	DPYSL3 (int) MAMLD1	false	int	DPYSL3 (int) MAMLD1
730	int	ATP6AP2 (int) SCPEP1	false	int	ATP6AP2 (int) SCPEP1
732	int	SCRN1 (int) NOVA1	false	int	SCRN1 (int) NOVA1
734	int	JUN (int) DLG1	false	int	JUN (int) DLG1
736	int	JUN (int) HIST1H1C	false	int	JUN (int) HIST1H1C
739	int	SQSTM1 (int) ETV5	false	int	SQSTM1 (int) ETV5
741	int	JUNB (int) NFKBIA	false	int	JUNB (int) NFKBIA
744	int	RRM1 (int) BRCA1	false	int	RRM1 (int) BRCA1
746	int	RRM1 (int) LOC81691	false	int	RRM1 (int) LOC81691
749	int	DKC1 (int) RTN2	false	int	DKC1 (int) RTN2
752	int	PRCP (int) S100A2	false	int	PRCP (int) S100A2
754	int	PRCP (int) ART4	false	int	PRCP (int) ART4
757	int	TSN (int) API5	false	int	TSN (int) API5
759	int	TSN (int) FERMT2	false	int	TSN (int) FERMT2
761	int	TSN (int) WTAP	false	int	TSN (int) WTAP
763	int	TSN (int) PDS5A	false	int	TSN (int) PDS5A
765	int	TSN (int) HN1L	false	int	TSN (int) HN1L
768	int	TGFBI (int) PIK3C2B	false	int	TGFBI (int) PIK3C2B
770	int	TGFBI (int) CD44	false	int	TGFBI (int) CD44
772	int	TGFBI (int) LPXN	false	int	TGFBI (int) LPXN
775	int	SRM (int) VARS	false	int	SRM (int) VARS
777	int	SRM (int) CENPB	false	int	SRM (int) CENPB
779	int	SRM (int) GMPPB	false	int	SRM (int) GMPPB
782	int	ZFP36 (int) PARP12	false	int	ZFP36 (int) PARP12
785	int	DUSP3 (int) SYNE1	false	int	DUSP3 (int) SYNE1
788	int	PABPN1 (int) BSG	false	int	PABPN1 (int) BSG
790	int	PABPN1 (int) COMT	false	int	PABPN1 (int) COMT
792	int	PABPN1 (int) PIGT	false	int	PABPN1 (int) PIGT
795	int	MCM3 (int) MCM6	false	int	MCM3 (int) MCM6
797	int	MCM3 (int) WIPI1	false	int	MCM3 (int) WIPI1
799	int	MCM3 (int) POLA1	false	int	MCM3 (int) POLA1
801	int	MCM3 (int) PSMD11	false	int	MCM3 (int) PSMD11
803	int	MCM3 (int) LMNB2	false	int	MCM3 (int) LMNB2
806	int	CLIC4 (int) RIOK3	false	int	CLIC4 (int) RIOK3
808	int	CLIC4 (int) TP53	false	int	CLIC4 (int) TP53
810	int	CLIC4 (int) KIAA1033	false	int	CLIC4 (int) KIAA1033
813	int	ID2 (int) ID3	false	int	ID2 (int) ID3
814	int	ID2 (int) PNMA2	false	int	ID2 (int) PNMA2
816	int	ID2 (int) HOXA2	false	int	ID2 (int) HOXA2
819	int	PODXL (int) SLC47A1	false	int	PODXL (int) SLC47A1
822	int	DDX39 (int) POLR2D	false	int	DDX39 (int) POLR2D
824	int	DDX39 (int) RAB40B	false	int	DDX39 (int) RAB40B
826	int	DDX39 (int) PLXND1	false	int	DDX39 (int) PLXND1
829	int	NISCH (int) AMT	false	int	NISCH (int) AMT
831	int	NISCH (int) CTDSP2	false	int	NISCH (int) CTDSP2
833	int	NISCH (int) AGRN	false	int	NISCH (int) AGRN
835	int	NISCH (int) MEGF6	false	int	NISCH (int) MEGF6
837	int	NISCH (int) SPG7	false	int	NISCH (int) SPG7
839	int	NISCH (int) TSPYL2	false	int	NISCH (int) TSPYL2
841	int	NISCH (int) LOC728392	false	int	NISCH (int) LOC728392
843	int	NISCH (int) EDN1	false	int	NISCH (int) EDN1
845	int	NISCH (int) LRDD	false	int	NISCH (int) LRDD
847	int	NISCH (int) LTBP3	false	int	NISCH (int) LTBP3
849	int	NISCH (int) MZF1	false	int	NISCH (int) MZF1
852	int	IFITM1 (int) FAM131A	false	int	IFITM1 (int) FAM131A
855	int	INSIG1 (int) SCD	false	int	INSIG1 (int) SCD
857	int	INSIG1 (int) IDI1	false	int	INSIG1 (int) IDI1
860	int	CYB5B (int) IL17RA	false	int	CYB5B (int) IL17RA
863	int	SCARB2 (int) TSPAN31	false	int	SCARB2 (int) TSPAN31
866	int	JAK1 (int) ANO10	false	int	JAK1 (int) ANO10
868	int	UBE2L6 (int) PSMB10	false	int	UBE2L6 (int) PSMB10
871	int	SMC4 (int) STMN1	false	int	SMC4 (int) STMN1
872	int	SMC4 (int) DEK	false	int	SMC4 (int) DEK
875	int	GYS1 (int) PVRL2	false	int	GYS1 (int) PVRL2
877	int	GYS1 (int) MAP1A	false	int	GYS1 (int) MAP1A
879	int	GYS1 (int) SIL1	false	int	GYS1 (int) SIL1
882	int	DNMT1 (int) CHAF1A	false	int	DNMT1 (int) CHAF1A
884	int	DNMT1 (int) MID2	false	int	DNMT1 (int) MID2
886	int	DNMT1 (int) AMACR	false	int	DNMT1 (int) AMACR
888	int	DNMT1 (int) NUP107	false	int	DNMT1 (int) NUP107
890	int	DNMT1 (int) CDK5RAP2	false	int	DNMT1 (int) CDK5RAP2
892	int	DNMT1 (int) APOOL	false	int	DNMT1 (int) APOOL
894	int	DNMT1 (int) ABHD2	false	int	DNMT1 (int) ABHD2
897	int	NIPSNAP1 (int) RECQL	false	int	NIPSNAP1 (int) RECQL
900	int	RANBP2 (int) ASAP1	false	int	RANBP2 (int) ASAP1
902	int	TUBG1 (int) CTNNB1	false	int	TUBG1 (int) CTNNB1
904	int	TUBG1 (int) THOP1	false	int	TUBG1 (int) THOP1
906	int	TUBG1 (int) DFNA5	false	int	TUBG1 (int) DFNA5
908	int	TUBG1 (int) ACD	false	int	TUBG1 (int) ACD
910	int	TUBG1 (int) ATRX	false	int	TUBG1 (int) ATRX
912	int	TUBG1 (int) WRAP53	false	int	TUBG1 (int) WRAP53
915	int	CLCN3 (int) CEPT1	false	int	CLCN3 (int) CEPT1
918	int	MARCH6 (int) TMEM187	false	int	MARCH6 (int) TMEM187
920	int	SFRS1 (int) TSN	false	int	SFRS1 (int) TSN
922	int	SFRS1 (int) TFDP1	false	int	SFRS1 (int) TFDP1
924	int	SFRS1 (int) MED6	false	int	SFRS1 (int) MED6
926	int	SFRS1 (int) PRKDC	false	int	SFRS1 (int) PRKDC
928	int	SFRS1 (int) PAFAH1B1	false	int	SFRS1 (int) PAFAH1B1
930	int	SFRS1 (int) OPA1	false	int	SFRS1 (int) OPA1
932	int	SFRS1 (int) NR1H3	false	int	SFRS1 (int) NR1H3
934	int	SFRS1 (int) TMEM50B	false	int	SFRS1 (int) TMEM50B
935	int	SFRS1 (int) EML4	false	int	SFRS1 (int) EML4
937	int	SFRS1 (int) PSAT1	false	int	SFRS1 (int) PSAT1
939	int	SFRS1 (int) PTDSS2	false	int	SFRS1 (int) PTDSS2
941	int	SAFB (int) PBLD	false	int	SAFB (int) PBLD
944	int	ECE1 (int) AMD1	false	int	ECE1 (int) AMD1
946	int	ECE1 (int) THBD	false	int	ECE1 (int) THBD
948	int	WSB2 (int) CHST15	false	int	WSB2 (int) CHST15
950	int	WSB2 (int) PTGS2	false	int	WSB2 (int) PTGS2
952	int	WSB2 (int) PDE10A	false	int	WSB2 (int) PDE10A
954	int	WSB2 (int) CLEC2B	false	int	WSB2 (int) CLEC2B
957	int	MTHFD2 (int) PDK2	false	int	MTHFD2 (int) PDK2
959	int	MTHFD2 (int) SMPDL3A	false	int	MTHFD2 (int) SMPDL3A
962	int	TMEM106C (int) HAUS4	false	int	TMEM106C (int) HAUS4
965	int	HEXA (int) ADD2	false	int	HEXA (int) ADD2
968	int	CLINT1 (int) MAP3K7	false	int	CLINT1 (int) MAP3K7
970	int	RNF13 (int) MMD	false	int	RNF13 (int) MMD
972	int	LBR (int) TMEM106C	false	int	LBR (int) TMEM106C
974	int	LBR (int) SYNE2	false	int	LBR (int) SYNE2
976	int	LBR (int) CUBN	false	int	LBR (int) CUBN
978	int	VARS (int) ABCB6	false	int	VARS (int) ABCB6
980	int	VARS (int) RRP12	false	int	VARS (int) RRP12
982	int	VARS (int) GPR172A	false	int	VARS (int) GPR172A
985	int	ENG (int) SLC29A1	false	int	ENG (int) SLC29A1
987	int	ENG (int) C19orf6	false	int	ENG (int) C19orf6
989	int	ENG (int) YIPF5	false	int	ENG (int) YIPF5
992	int	RNF14 (int) DDA1	false	int	RNF14 (int) DDA1
994	int	RNF14 (int) C11orf71	false	int	RNF14 (int) C11orf71
997	int	LIPA (int) STK39	false	int	LIPA (int) STK39
999	int	LIPA (int) CFI	false	int	LIPA (int) CFI
1001	int	LIPA (int) IL3RA	false	int	LIPA (int) IL3RA
1003	int	LIPA (int) PDE3A	false	int	LIPA (int) PDE3A
1005	int	LIPA (int) LDB2	false	int	LIPA (int) LDB2
1007	int	LIPA (int) MTUS1	false	int	LIPA (int) MTUS1
1009	int	LIPA (int) OGFRL1	false	int	LIPA (int) OGFRL1
1011	int	LIPA (int) TBC1D2	false	int	LIPA (int) TBC1D2
1014	int	PLAT (int) ZDHHC13	false	int	PLAT (int) ZDHHC13
1016	int	LRRFIP1 (int) MYCBP	false	int	LRRFIP1 (int) MYCBP
1019	int	NR3C1 (int) MME	false	int	NR3C1 (int) MME
1022	int	CKS1B (int) RANBP1	false	int	CKS1B (int) RANBP1
1024	int	CKS1B (int) PRPS2	false	int	CKS1B (int) PRPS2
1026	int	CKS1B (int) TRIP13	false	int	CKS1B (int) TRIP13
1028	int	CKS1B (int) CDC45L	false	int	CKS1B (int) CDC45L
1030	int	CKS1B (int) ABCG1	false	int	CKS1B (int) ABCG1
1032	int	CKS1B (int) CCDC99	false	int	CKS1B (int) CCDC99
1035	int	CTDSPL (int) GNB5	false	int	CTDSPL (int) GNB5
1037	int	CTDSPL (int) C17orf91	false	int	CTDSPL (int) C17orf91
1040	int	CD55 (int) RRP1B	false	int	CD55 (int) RRP1B
1042	int	MCM6 (int) PRIM1	false	int	MCM6 (int) PRIM1
1045	int	CCT2 (int) GALK2	false	int	CCT2 (int) GALK2
1047	int	CCT2 (int) NCBP1	false	int	CCT2 (int) NCBP1
1049	int	CCT2 (int) SENP3	false	int	CCT2 (int) SENP3
1052	int	NASP (int) RFC5	false	int	NASP (int) RFC5
1055	int	CREBL2 (int) FKBP1A	false	int	CREBL2 (int) FKBP1A
1058	int	KIF5B (int) PPP3R1	false	int	KIF5B (int) PPP3R1
1060	int	KIF5B (int) FLJ42627	false	int	KIF5B (int) FLJ42627
1063	int	SPEN (int) WASL	false	int	SPEN (int) WASL
1065	int	SPEN (int) ZNF609	false	int	SPEN (int) ZNF609
1067	int	SPEN (int) BAT2D1	false	int	SPEN (int) BAT2D1
1069	int	ST6GAL1 (int) PRCP	false	int	ST6GAL1 (int) PRCP
1071	int	ST6GAL1 (int) RARB	false	int	ST6GAL1 (int) RARB
1073	int	ST6GAL1 (int) FNBP1	false	int	ST6GAL1 (int) FNBP1
1075	int	ST6GAL1 (int) FOXC1	false	int	ST6GAL1 (int) FOXC1
1078	int	NID1 (int) MAPKAPK3	false	int	NID1 (int) MAPKAPK3
1080	int	NID1 (int) ALDH1A1	false	int	NID1 (int) ALDH1A1
1083	int	EXT2 (int) SPTLC2	false	int	EXT2 (int) SPTLC2
1085	int	EXT2 (int) MMP16	false	int	EXT2 (int) MMP16
1088	int	EFNA1 (int) EFNB2	false	int	EFNA1 (int) EFNB2
1090	int	EFNA1 (int) HPCAL1	false	int	EFNA1 (int) HPCAL1
1092	int	EFNA1 (int) INSR	false	int	EFNA1 (int) INSR
1094	int	EFNA1 (int) SNCAIP	false	int	EFNA1 (int) SNCAIP
1096	int	EFNA1 (int) SEMA3G	false	int	EFNA1 (int) SEMA3G
1099	int	KPNA1 (int) APC	false	int	KPNA1 (int) APC
1102	int	LDLR (int) SLC11A2	false	int	LDLR (int) SLC11A2
1104	int	LDLR (int) ROBO4	false	int	LDLR (int) ROBO4
1107	int	IDH3A (int) C12orf4	false	int	IDH3A (int) C12orf4
1110	int	SDC4 (int) NPR2	false	int	SDC4 (int) NPR2
1113	int	OPTN (int) SLC12A7	false	int	OPTN (int) SLC12A7
1116	int	MX1 (int) IRF7	false	int	MX1 (int) IRF7
1119	int	SLC39A6 (int) LRP12	false	int	SLC39A6 (int) LRP12
1122	int	BIRC5 (int) PLK1	false	int	BIRC5 (int) PLK1
1124	int	BIRC5 (int) DTYMK	false	int	BIRC5 (int) DTYMK
1126	int	RALB (int) RAB11A	false	int	RALB (int) RAB11A
1129	int	BRD4 (int) ANKRD11	false	int	BRD4 (int) ANKRD11
1132	int	MCM2 (int) SKP2	false	int	MCM2 (int) SKP2
1133	int	MCM2 (int) CDC45L	false	int	MCM2 (int) CDC45L
1135	int	MCM2 (int) POLD3	false	int	MCM2 (int) POLD3
1138	int	SNX2 (int) ATF5	false	int	SNX2 (int) ATF5
1140	int	SNX2 (int) ERLIN2	false	int	SNX2 (int) ERLIN2
1142	int	SNX2 (int) ANGEL2	false	int	SNX2 (int) ANGEL2
1144	int	SNX2 (int) TMEM135	false	int	SNX2 (int) TMEM135
1146	int	RIOK3 (int) SSR3	false	int	RIOK3 (int) SSR3
1148	int	RIOK3 (int) PHF17	false	int	RIOK3 (int) PHF17
1151	int	NEDD9 (int) BMP4	false	int	NEDD9 (int) BMP4
1153	int	NEDD9 (int) SPHK1	false	int	NEDD9 (int) SPHK1
1156	int	PKN1 (int) CYB5R4	false	int	PKN1 (int) CYB5R4
1159	int	PPP2R5A (int) SERPINB1	false	int	PPP2R5A (int) SERPINB1
1162	int	LAMA4 (int) ELOVL6	false	int	LAMA4 (int) ELOVL6
1164	int	LAMA4 (int) CBR1	false	int	LAMA4 (int) CBR1
1167	int	FADS2 (int) FADS1	false	int	FADS2 (int) FADS1
1170	int	KIAA0907 (int) DNAJB9	false	int	KIAA0907 (int) DNAJB9
1172	int	KIAA0907 (int) C1orf63	false	int	KIAA0907 (int) C1orf63
1174	int	KIAA0907 (int) ANKLE2	false	int	KIAA0907 (int) ANKLE2
1176	int	KIAA0907 (int) JMJD6	false	int	KIAA0907 (int) JMJD6
1178	int	KIAA0907 (int) ZFC3H1	false	int	KIAA0907 (int) ZFC3H1
1180	int	KIAA0907 (int) EIF2C3	false	int	KIAA0907 (int) EIF2C3
1182	int	SLC16A1 (int) DEGS1	false	int	SLC16A1 (int) DEGS1
1184	int	SLC16A1 (int) TRAK1	false	int	SLC16A1 (int) TRAK1
1186	int	NNMT (int) WARS	false	int	NNMT (int) WARS
1187	int	NNMT (int) SDC4	false	int	NNMT (int) SDC4
1189	int	NNMT (int) ABCC4	false	int	NNMT (int) ABCC4
1191	int	NNMT (int) RAB32	false	int	NNMT (int) RAB32
1192	int	PLK1 (int) SH3BGRL	false	int	PLK1 (int) SH3BGRL
1194	int	PLK1 (int) GADD45A	false	int	PLK1 (int) GADD45A
1196	int	PLK1 (int) CCNB1	false	int	PLK1 (int) CCNB1
1198	int	PLK1 (int) FAM64A	false	int	PLK1 (int) FAM64A
1200	int	TSPAN7 (int) LIPA	false	int	TSPAN7 (int) LIPA
1202	int	TSPAN7 (int) MGP	false	int	TSPAN7 (int) MGP
1204	int	TSPAN7 (int) ENPP4	false	int	TSPAN7 (int) ENPP4
1206	int	TSPAN7 (int) SELL	false	int	TSPAN7 (int) SELL
1208	int	TSPAN7 (int) PDGFRL	false	int	TSPAN7 (int) PDGFRL
1210	int	TSPAN7 (int) RUNX1T1	false	int	TSPAN7 (int) RUNX1T1
1212	int	TSPAN7 (int) METTL7A	false	int	TSPAN7 (int) METTL7A
1214	int	TSPAN7 (int) MGLL	false	int	TSPAN7 (int) MGLL
1216	int	TSPAN7 (int) CLIC2	false	int	TSPAN7 (int) CLIC2
1218	int	TSPAN7 (int) JAM2	false	int	TSPAN7 (int) JAM2
1220	int	TSPAN7 (int) C1QTNF1	false	int	TSPAN7 (int) C1QTNF1
1222	int	TSPAN7 (int) FBXO42	false	int	TSPAN7 (int) FBXO42
1225	int	SPTLC1 (int) MIA3	false	int	SPTLC1 (int) MIA3
1228	int	CDKN1A (int) ATF3	false	int	CDKN1A (int) ATF3
1230	int	CDKN1A (int) FOSL2	false	int	CDKN1A (int) FOSL2
1232	int	CDKN1A (int) C7orf10	false	int	CDKN1A (int) C7orf10
1234	int	CDKN1A (int) ANKRD55	false	int	CDKN1A (int) ANKRD55
1236	int	CDKN1A (int) GDF15	false	int	CDKN1A (int) GDF15
1239	int	COL1A1 (int) COL1A2	false	int	COL1A1 (int) COL1A2
1241	int	COL1A1 (int) S100A4	false	int	COL1A1 (int) S100A4
1243	int	COL1A1 (int) NOTCH3	false	int	COL1A1 (int) NOTCH3
1245	int	COL1A1 (int) ITM2C	false	int	COL1A1 (int) ITM2C
1248	int	FABP5 (int) VASH1	false	int	FABP5 (int) VASH1
1250	int	FABP5 (int) FABP4	false	int	FABP5 (int) FABP4
1252	int	FABP5 (int) FRMD4B	false	int	FABP5 (int) FRMD4B
1255	int	TOR1A (int) TM9SF1	false	int	TOR1A (int) TM9SF1
1257	int	ITGAV (int) SLC39A6	false	int	ITGAV (int) SLC39A6
1259	int	ITGAV (int) PLOD2	false	int	ITGAV (int) PLOD2
1261	int	ITGAV (int) SERPINE1	false	int	ITGAV (int) SERPINE1
1263	int	ITGAV (int) ICAM1	false	int	ITGAV (int) ICAM1
1265	int	ITGAV (int) ING3	false	int	ITGAV (int) ING3
1267	int	ITGAV (int) FN1	false	int	ITGAV (int) FN1
1269	int	ITGAV (int) TPM1	false	int	ITGAV (int) TPM1
1271	int	ITGAV (int) RHOB	false	int	ITGAV (int) RHOB
1273	int	ITGAV (int) CCL2	false	int	ITGAV (int) CCL2
1275	int	ITGAV (int) BCL2L13	false	int	ITGAV (int) BCL2L13
1277	int	ITGAV (int) TNFRSF21	false	int	ITGAV (int) TNFRSF21
1278	int	ITGAV (int) YIPF5	false	int	ITGAV (int) YIPF5
1280	int	ITGAV (int) SLC27A3	false	int	ITGAV (int) SLC27A3
1283	int	CUX1 (int) INPP5F	false	int	CUX1 (int) INPP5F
1285	int	CUX1 (int) TCTN1	false	int	CUX1 (int) TCTN1
1288	int	ADAM9 (int) MAGT1	false	int	ADAM9 (int) MAGT1
1291	int	TCOF1 (int) PPAP2A	false	int	TCOF1 (int) PPAP2A
1293	int	TCOF1 (int) HIPK1	false	int	TCOF1 (int) HIPK1
1295	int	COL1A2 (int) IGFBP5	false	int	COL1A2 (int) IGFBP5
1298	int	PRPF31 (int) U2AF2	false	int	PRPF31 (int) U2AF2
1300	int	PRPF31 (int) RCL1	false	int	PRPF31 (int) RCL1
1302	int	USP1 (int) SMC4	false	int	USP1 (int) SMC4
1304	int	USP1 (int) EZH2	false	int	USP1 (int) EZH2
1306	int	USP1 (int) PLK4	false	int	USP1 (int) PLK4
1308	int	USP1 (int) CCNE2	false	int	USP1 (int) CCNE2
1311	int	HSPBP1 (int) C15orf39	false	int	HSPBP1 (int) C15orf39
1313	int	HSPBP1 (int) GCDH	false	int	HSPBP1 (int) GCDH
1315	int	HSPBP1 (int) BOP1	false	int	HSPBP1 (int) BOP1
1318	int	PPP3CA (int) ARIH2	false	int	PPP3CA (int) ARIH2
1319	int	PPP3CA (int) LIPA	false	int	PPP3CA (int) LIPA
1321	int	PPP3CA (int) EGFR	false	int	PPP3CA (int) EGFR
1323	int	PPP3CA (int) ANGPT2	false	int	PPP3CA (int) ANGPT2
1325	int	PPP3CA (int) SETBP1	false	int	PPP3CA (int) SETBP1
1327	int	PPP3CA (int) CHST7	false	int	PPP3CA (int) CHST7
1329	int	PPP3CA (int) MICAL2	false	int	PPP3CA (int) MICAL2
1331	int	PPP3CA (int) STON1	false	int	PPP3CA (int) STON1
1333	int	PPP3CA (int) GIPC2	false	int	PPP3CA (int) GIPC2
1335	int	PPP3CA (int) HYI	false	int	PPP3CA (int) HYI
1337	int	PPP3CA (int) TNS1	false	int	PPP3CA (int) TNS1
1339	int	PPP3CA (int) MAN1A1	false	int	PPP3CA (int) MAN1A1
1341	int	PPP3CA (int) PPARD	false	int	PPP3CA (int) PPARD
1343	int	ERLIN1 (int) CDC5L	false	int	ERLIN1 (int) CDC5L
1345	int	ERLIN1 (int) PTPLAD1	false	int	ERLIN1 (int) PTPLAD1
1347	int	ERLIN1 (int) HP1BP3	false	int	ERLIN1 (int) HP1BP3
1350	int	CTSK (int) SORD	false	int	CTSK (int) SORD
1353	int	HDAC5 (int) STK10	false	int	HDAC5 (int) STK10
1355	int	PRSS23 (int) PRNP	false	int	PRSS23 (int) PRNP
1357	int	PRSS23 (int) ME3	false	int	PRSS23 (int) ME3
1360	int	EIF2B2 (int) NXN	false	int	EIF2B2 (int) NXN
1363	int	PFKFB3 (int) TSPAN4	false	int	PFKFB3 (int) TSPAN4
1365	int	RANBP1 (int) ACP1	false	int	RANBP1 (int) ACP1
1367	int	RANBP1 (int) HNRNPH3	false	int	RANBP1 (int) HNRNPH3
1369	int	RANBP1 (int) EXOSC2	false	int	RANBP1 (int) EXOSC2
1370	int	RANBP1 (int) PSAT1	false	int	RANBP1 (int) PSAT1
1372	int	DLG1 (int) LAMA3	false	int	DLG1 (int) LAMA3
1375	int	SMAD4 (int) POLRMT	false	int	SMAD4 (int) POLRMT
1377	int	SMAD4 (int) CLDND1	false	int	SMAD4 (int) CLDND1
1379	int	SMAD4 (int) DCUN1D4	false	int	SMAD4 (int) DCUN1D4
1381	int	SMAD4 (int) KRIT1	false	int	SMAD4 (int) KRIT1
1383	int	HMGCR (int) LDLR	false	int	HMGCR (int) LDLR
1385	int	GMFB (int) RNF14	false	int	GMFB (int) RNF14
1388	int	ARL2 (int) BGLAP	false	int	ARL2 (int) BGLAP
1391	int	SVIL (int) DBN1	false	int	SVIL (int) DBN1
1393	int	SVIL (int) SPTBN1	false	int	SVIL (int) SPTBN1
1396	int	DLGAP4 (int) CTSZ	false	int	DLGAP4 (int) CTSZ
1398	int	FOXM1 (int) IGF2R	false	int	FOXM1 (int) IGF2R
1400	int	FOXM1 (int) CENPM	false	int	FOXM1 (int) CENPM
1402	int	FOXM1 (int) C1RL	false	int	FOXM1 (int) C1RL
1404	int	ADAM10 (int) TM9SF2	false	int	ADAM10 (int) TM9SF2
1405	int	ADAM10 (int) CD55	false	int	ADAM10 (int) CD55
1407	int	ADAM10 (int) MINPP1	false	int	ADAM10 (int) MINPP1
1409	int	ADAM10 (int) ATRN	false	int	ADAM10 (int) ATRN
1411	int	ADAM10 (int) EXD2	false	int	ADAM10 (int) EXD2
1413	int	ADAM10 (int) SFN	false	int	ADAM10 (int) SFN
1416	int	EPS8 (int) CCNA1	false	int	EPS8 (int) CCNA1
1418	int	EPS8 (int) TSKU	false	int	EPS8 (int) TSKU
1420	int	EPS8 (int) SDPR	false	int	EPS8 (int) SDPR
1423	int	CTPS (int) BEX4	false	int	CTPS (int) BEX4
1425	int	CTPS (int) ABHD4	false	int	CTPS (int) ABHD4
1426	int	PLOD2 (int) CALU	false	int	PLOD2 (int) CALU
1427	int	PLOD2 (int) ADAM9	false	int	PLOD2 (int) ADAM9
1429	int	PLOD2 (int) KCNJ2	false	int	PLOD2 (int) KCNJ2
1431	int	PLOD2 (int) ATP2C1	false	int	PLOD2 (int) ATP2C1
1433	int	PLOD2 (int) PVR	false	int	PLOD2 (int) PVR
1435	int	PLOD2 (int) DCBLD2	false	int	PLOD2 (int) DCBLD2
1437	int	PLOD2 (int) SPATS2L	false	int	PLOD2 (int) SPATS2L
1439	int	PLOD2 (int) C14orf139	false	int	PLOD2 (int) C14orf139
1442	int	LYN (int) RGL1	false	int	LYN (int) RGL1
1444	int	LYN (int) PPM1F	false	int	LYN (int) PPM1F
1445	int	SERPINE1 (int) TGFBI	false	int	SERPINE1 (int) TGFBI
1447	int	SERPINE1 (int) PLAU	false	int	SERPINE1 (int) PLAU
1449	int	SERPINE1 (int) SRPX2	false	int	SERPINE1 (int) SRPX2
1451	int	SERPINE1 (int) SMURF2	false	int	SERPINE1 (int) SMURF2
1453	int	SERPINE1 (int) NLGN1	false	int	SERPINE1 (int) NLGN1
1455	int	SERPINE1 (int) STAG2	false	int	SERPINE1 (int) STAG2
1457	int	SERPINE1 (int) INHBA	false	int	SERPINE1 (int) INHBA
1459	int	SERPINE1 (int) GALNT10	false	int	SERPINE1 (int) GALNT10
1461	int	SERPINE1 (int) RRAS	false	int	SERPINE1 (int) RRAS
1463	int	SERPINE1 (int) SAMD4A	false	int	SERPINE1 (int) SAMD4A
1465	int	SERPINE1 (int) C6orf145	false	int	SERPINE1 (int) C6orf145
1467	int	SERPINE1 (int) ZNF395	false	int	SERPINE1 (int) ZNF395
1469	int	SERPINE1 (int) TBC1D15	false	int	SERPINE1 (int) TBC1D15
1471	int	SERPINE1 (int) ZCCHC2	false	int	SERPINE1 (int) ZCCHC2
1473	int	SERPINE1 (int) MIR21	false	int	SERPINE1 (int) MIR21
1475	int	TOPBP1 (int) EIF1AX	false	int	TOPBP1 (int) EIF1AX
1478	int	RNF103 (int) TRIB3	false	int	RNF103 (int) TRIB3
1480	int	ICAM1 (int) CXCL6	false	int	ICAM1 (int) CXCL6
1482	int	ICAM1 (int) RND1	false	int	ICAM1 (int) RND1
1484	int	ICAM1 (int) IL1A	false	int	ICAM1 (int) IL1A
1486	int	ICAM1 (int) LMNA	false	int	ICAM1 (int) LMNA
1488	int	ICAM1 (int) NEDD4L	false	int	ICAM1 (int) NEDD4L
1490	int	ICAM1 (int) SOD2	false	int	ICAM1 (int) SOD2
1493	int	TNFAIP3 (int) ZC3H12A	false	int	TNFAIP3 (int) ZC3H12A
1496	int	MARCH7 (int) THBS1	false	int	MARCH7 (int) THBS1
1497	int	MARCH7 (int) TCOF1	false	int	MARCH7 (int) TCOF1
1499	int	MARCH7 (int) OCRL	false	int	MARCH7 (int) OCRL
1501	int	MARCH7 (int) SLC7A11	false	int	MARCH7 (int) SLC7A11
1503	int	MANF (int) CIRBP	false	int	MANF (int) CIRBP
1505	int	MANF (int) HSPH1	false	int	MANF (int) HSPH1
1507	int	MANF (int) SERPINH1	false	int	MANF (int) SERPINH1
1509	int	MANF (int) SLC39A14	false	int	MANF (int) SLC39A14
1511	int	MANF (int) SRPRB	false	int	MANF (int) SRPRB
1513	int	MANF (int) BANP	false	int	MANF (int) BANP
1515	int	EFNB2 (int) IFNGR1	false	int	EFNB2 (int) IFNGR1
1517	int	EFNB2 (int) GJA4	false	int	EFNB2 (int) GJA4
1519	int	ATF3 (int) PMAIP1	false	int	ATF3 (int) PMAIP1
1521	int	ATF3 (int) IL7R	false	int	ATF3 (int) IL7R
1523	int	ATF3 (int) ALPK3	false	int	ATF3 (int) ALPK3
1526	int	AXL (int) UPP1	false	int	AXL (int) UPP1
1528	int	TNFSF10 (int) EPAS1	false	int	TNFSF10 (int) EPAS1
1530	int	TNFSF10 (int) PBX3	false	int	TNFSF10 (int) PBX3
1532	int	TNFSF10 (int) FILIP1L	false	int	TNFSF10 (int) FILIP1L
1534	int	TNFSF10 (int) FLRT2	false	int	TNFSF10 (int) FLRT2
1536	int	TNFSF10 (int) FOSL1	false	int	TNFSF10 (int) FOSL1
1538	int	TNFSF10 (int) CXCL2	false	int	TNFSF10 (int) CXCL2
1540	int	TNFSF10 (int) DSE	false	int	TNFSF10 (int) DSE
1542	int	TNFSF10 (int) IFIH1	false	int	TNFSF10 (int) IFIH1
1544	int	TNFSF10 (int) NRIP3	false	int	TNFSF10 (int) NRIP3
1547	int	SNRPD1 (int) GLS	false	int	SNRPD1 (int) GLS
1549	int	SNRPD1 (int) TIE1	false	int	SNRPD1 (int) TIE1
1551	int	SNRPD1 (int) KDM4B	false	int	SNRPD1 (int) KDM4B
1554	int	CCNB2 (int) NDC80	false	int	CCNB2 (int) NDC80
1556	int	CCNB2 (int) APBA2	false	int	CCNB2 (int) APBA2
1558	int	CCNB2 (int) OIP5	false	int	CCNB2 (int) OIP5
1561	int	GFPT1 (int) NEK3	false	int	GFPT1 (int) NEK3
1564	int	LTBP1 (int) VAMP8	false	int	LTBP1 (int) VAMP8
1567	int	P4HA2 (int) KDELR2	false	int	P4HA2 (int) KDELR2
1570	int	PIK3R3 (int) TSC22D1	false	int	PIK3R3 (int) TSC22D1
1573	int	SLC7A8 (int) CCL23	false	int	SLC7A8 (int) CCL23
1574	int	SLC7A8 (int) C14orf139	false	int	SLC7A8 (int) C14orf139
1577	int	AKAP2 (int) CALM1	false	int	AKAP2 (int) CALM1
1579	int	PALM2-AKAP2 (int) AKAP2	false	int	PALM2-AKAP2 (int) AKAP2
1581	int	PALM2-AKAP2 (int) BAMBI	false	int	PALM2-AKAP2 (int) BAMBI
1583	int	PALM2-AKAP2 (int) CHST2	false	int	PALM2-AKAP2 (int) CHST2
1585	int	SYNE2 (int) SLC25A20	false	int	SYNE2 (int) SLC25A20
1588	int	FBN1 (int) F2R	false	int	FBN1 (int) F2R
1590	int	FBN1 (int) NUAK1	false	int	FBN1 (int) NUAK1
1592	int	FBN1 (int) JAG1	false	int	FBN1 (int) JAG1
1594	int	HMGCL (int) NIPSNAP1	false	int	HMGCL (int) NIPSNAP1
1596	int	HMGCL (int) PIGV	false	int	HMGCL (int) PIGV
1598	int	HMGCL (int) MYLIP	false	int	HMGCL (int) MYLIP
1600	int	HMGCL (int) C19orf54	false	int	HMGCL (int) C19orf54
1602	int	HMGCL (int) ASMTL	false	int	HMGCL (int) ASMTL
1605	int	SFRS8 (int) RASA2	false	int	SFRS8 (int) RASA2
1608	int	UBE2S (int) GOLGB1	false	int	UBE2S (int) GOLGB1
1609	int	UBE2S (int) DDX39	false	int	UBE2S (int) DDX39
1611	int	UBE2S (int) CD59	false	int	UBE2S (int) CD59
1613	int	UBE2S (int) HGSNAT	false	int	UBE2S (int) HGSNAT
1615	int	UBE2S (int) CRYL1	false	int	UBE2S (int) CRYL1
1616	int	UBE2S (int) CCDC99	false	int	UBE2S (int) CCDC99
1618	int	NNT (int) MLLT3	false	int	NNT (int) MLLT3
1620	int	NNT (int) CSNK1E	false	int	NNT (int) CSNK1E
1622	int	STK39 (int) OXA1L	false	int	STK39 (int) OXA1L
1624	int	STK39 (int) STEAP3	false	int	STK39 (int) STEAP3
1626	int	MAPKAPK3 (int) HSPA4	false	int	MAPKAPK3 (int) HSPA4
1628	int	MAPKAPK3 (int) UBXN7	false	int	MAPKAPK3 (int) UBXN7
1631	int	INPP1 (int) ZNF124	false	int	INPP1 (int) ZNF124
1633	int	DBN1 (int) FLNB	false	int	DBN1 (int) FLNB
1636	int	TCEB3 (int) KIAA0100	false	int	TCEB3 (int) KIAA0100
1638	int	TCEB3 (int) GRB2	false	int	TCEB3 (int) GRB2
1641	int	LPP (int) CTTN	false	int	LPP (int) CTTN
1644	int	SLC25A4 (int) DOK5	false	int	SLC25A4 (int) DOK5
1645	int	DNAJB9 (int) XBP1	false	int	DNAJB9 (int) XBP1
1647	int	DNAJB9 (int) SEL1L	false	int	DNAJB9 (int) SEL1L
1649	int	DNAJB9 (int) TRIP11	false	int	DNAJB9 (int) TRIP11
1651	int	DNAJB9 (int) TIPARP	false	int	DNAJB9 (int) TIPARP
1653	int	DNAJB9 (int) HERPUD1	false	int	DNAJB9 (int) HERPUD1
1656	int	SLC16A3 (int) DLG5	false	int	SLC16A3 (int) DLG5
1658	int	SLC16A3 (int) GALNT2	false	int	SLC16A3 (int) GALNT2
1659	int	SLC16A3 (int) TRPV2	false	int	SLC16A3 (int) TRPV2
1661	int	CDC20 (int) SH3BGRL	false	int	CDC20 (int) SH3BGRL
1662	int	CDC20 (int) UBE2S	false	int	CDC20 (int) UBE2S
1664	int	CDC20 (int) PKMYT1	false	int	CDC20 (int) PKMYT1
1666	int	CDC20 (int) POP7	false	int	CDC20 (int) POP7
1668	int	CDC20 (int) CSE1L	false	int	CDC20 (int) CSE1L
1670	int	CDC20 (int) MKI67	false	int	CDC20 (int) MKI67
1672	int	CDC20 (int) KIAA0746	false	int	CDC20 (int) KIAA0746
1674	int	CDC20 (int) C17orf48	false	int	CDC20 (int) C17orf48
1677	int	TRAF4 (int) YWHAH	false	int	TRAF4 (int) YWHAH
1679	int	TRAF4 (int) LRP3	false	int	TRAF4 (int) LRP3
1681	int	TRAF4 (int) ZNF419	false	int	TRAF4 (int) ZNF419
1684	int	ATP6V1C1 (int) CREM	false	int	ATP6V1C1 (int) CREM
1687	int	CD93 (int) CFDP1	false	int	CD93 (int) CFDP1
1689	int	CD93 (int) CLDN5	false	int	CD93 (int) CLDN5
1692	int	PPP2R1B (int) HSPA4L	false	int	PPP2R1B (int) HSPA4L
1695	int	DDIT4 (int) C8orf4	false	int	DDIT4 (int) C8orf4
1698	int	ANPEP (int) SOBP	false	int	ANPEP (int) SOBP
1701	int	SFRS3 (int) SFRS2	false	int	SFRS3 (int) SFRS2
1702	int	SFRS3 (int) TRA2B	false	int	SFRS3 (int) TRA2B
1704	int	SFRS3 (int) IVNS1ABP	false	int	SFRS3 (int) IVNS1ABP
1706	int	SFRS3 (int) SFRS7	false	int	SFRS3 (int) SFRS7
1709	int	NUP88 (int) LMBR1L	false	int	NUP88 (int) LMBR1L
1712	int	CTSS (int) ISG20	false	int	CTSS (int) ISG20
1715	int	WFS1 (int) UNC13B	false	int	WFS1 (int) UNC13B
1717	int	WFS1 (int) MYO6	false	int	WFS1 (int) MYO6
1719	int	ADM (int) WFS1	false	int	ADM (int) WFS1
1721	int	ADM (int) PDGFD	false	int	ADM (int) PDGFD
1724	int	HK2 (int) CRTAP	false	int	HK2 (int) CRTAP
1726	int	HK2 (int) KDM3A	false	int	HK2 (int) KDM3A
1729	int	IL1R1 (int) C10orf116	false	int	IL1R1 (int) C10orf116
1731	int	IL1R1 (int) HMGA2	false	int	IL1R1 (int) HMGA2
1733	int	IL1R1 (int) PDLIM3	false	int	IL1R1 (int) PDLIM3
1735	int	IL1R1 (int) CXCR7	false	int	IL1R1 (int) CXCR7
1738	int	FHL2 (int) NAV2	false	int	FHL2 (int) NAV2
1741	int	UBE2C (int) H2AFX	false	int	UBE2C (int) H2AFX
1743	int	UBE2C (int) DST	false	int	UBE2C (int) DST
1745	int	UBE2C (int) CDCA8	false	int	UBE2C (int) CDCA8
1748	int	MPP1 (int) ANXA3	false	int	MPP1 (int) ANXA3
1751	int	RHOBTB3 (int) CAV2	false	int	RHOBTB3 (int) CAV2
1753	int	RHOBTB3 (int) LXN	false	int	RHOBTB3 (int) LXN
1755	int	RHOBTB3 (int) TSPAN12	false	int	RHOBTB3 (int) TSPAN12
1758	int	LOXL2 (int) QSOX1	false	int	LOXL2 (int) QSOX1
1760	int	SSX2IP (int) NR3C1	false	int	SSX2IP (int) NR3C1
1762	int	SSX2IP (int) MYO1E	false	int	SSX2IP (int) MYO1E
1764	int	SSX2IP (int) BACE2	false	int	SSX2IP (int) BACE2
1766	int	SSX2IP (int) APOO	false	int	SSX2IP (int) APOO
1768	int	SSX2IP (int) DOCK6	false	int	SSX2IP (int) DOCK6
1771	int	RNASEH2A (int) HAUS7	false	int	RNASEH2A (int) HAUS7
1773	int	CYBA (int) DPYSL3	false	int	CYBA (int) DPYSL3
1776	int	FH (int) AIDA	false	int	FH (int) AIDA
1778	int	LAMP2 (int) TM2D1	false	int	LAMP2 (int) TM2D1
1780	int	LAMP2 (int) NCAPH	false	int	LAMP2 (int) NCAPH
1783	int	TTC37 (int) IFT57	false	int	TTC37 (int) IFT57
1786	int	PAPSS2 (int) IL15RA	false	int	PAPSS2 (int) IL15RA
1788	int	CHST15 (int) PECI	false	int	CHST15 (int) PECI
1791	int	CTNNBIP1 (int) NAGLU	false	int	CTNNBIP1 (int) NAGLU
1794	int	GPRC5A (int) BDNF	false	int	GPRC5A (int) BDNF
1795	int	GPRC5A (int) ANXA3	false	int	GPRC5A (int) ANXA3
1798	int	CCDC86 (int) NPC2	false	int	CCDC86 (int) NPC2
1800	int	CCDC86 (int) CCNG2	false	int	CCDC86 (int) CCNG2
1802	int	CCDC86 (int) NCLN	false	int	CCDC86 (int) NCLN
1805	int	IMPA2 (int) TMSB15A	false	int	IMPA2 (int) TMSB15A
1808	int	HAT1 (int) CETN3	false	int	HAT1 (int) CETN3
1810	int	HAT1 (int) HSD17B14	false	int	HAT1 (int) HSD17B14
1813	int	KIAA0040 (int) PKIG	false	int	KIAA0040 (int) PKIG
1815	int	KIAA0040 (int) TUFT1	false	int	KIAA0040 (int) TUFT1
1817	int	KIAA0040 (int) GADD45B	false	int	KIAA0040 (int) GADD45B
1819	int	KIAA0040 (int) RPGR	false	int	KIAA0040 (int) RPGR
1822	int	SPAG5 (int) AURKB	false	int	SPAG5 (int) AURKB
1824	int	SPAG5 (int) C1orf135	false	int	SPAG5 (int) C1orf135
1826	int	PVRL2 (int) RRBP1	false	int	PVRL2 (int) RRBP1
1828	int	PVRL2 (int) CNPY2	false	int	PVRL2 (int) CNPY2
1830	int	MAP1A (int) OAZ3	false	int	MAP1A (int) OAZ3
1832	int	IFIT1 (int) IFITM1	false	int	IFIT1 (int) IFITM1
1834	int	IFIT1 (int) IFI6	false	int	IFIT1 (int) IFI6
1836	int	IFIT1 (int) IFIT3	false	int	IFIT1 (int) IFIT3
1838	int	IFIT1 (int) IFI44	false	int	IFIT1 (int) IFI44
1840	int	GLS (int) TXNIP	false	int	GLS (int) TXNIP
1842	int	GLS (int) VWA5A	false	int	GLS (int) VWA5A
1844	int	GLS (int) DIDO1	false	int	GLS (int) DIDO1
1847	int	TIMP2 (int) LHFPL2	false	int	TIMP2 (int) LHFPL2
1850	int	ALDH1A3 (int) ASB1	false	int	ALDH1A3 (int) ASB1
1853	int	FBN2 (int) NMU	false	int	FBN2 (int) NMU
1856	int	RASSF2 (int) PDGFB	false	int	RASSF2 (int) PDGFB
1859	int	MTFR1 (int) PHTF1	false	int	MTFR1 (int) PHTF1
1861	int	CDC2 (int) PCNA	false	int	CDC2 (int) PCNA
1863	int	CDC2 (int) CKS2	false	int	CDC2 (int) CKS2
1865	int	CDC2 (int) PTPRG	false	int	CDC2 (int) PTPRG
1867	int	CDC2 (int) HMGB2	false	int	CDC2 (int) HMGB2
1869	int	CDC2 (int) TMEM97	false	int	CDC2 (int) TMEM97
1871	int	CDC2 (int) TMEM194A	false	int	CDC2 (int) TMEM194A
1873	int	MYO6 (int) EPHA4	false	int	MYO6 (int) EPHA4
1876	int	RFK (int) MEIS1	false	int	RFK (int) MEIS1
1878	int	RFK (int) SMAD3	false	int	RFK (int) SMAD3
1880	int	RFK (int) FGGY	false	int	RFK (int) FGGY
1882	int	TSPAN31 (int) TMEM43	false	int	TSPAN31 (int) TMEM43
1884	int	UPP1 (int) HUS1	false	int	UPP1 (int) HUS1
1887	int	NCRNA00094 (int) BSCL2	false	int	NCRNA00094 (int) BSCL2
1889	int	DTYMK (int) KIF22	false	int	DTYMK (int) KIF22
1891	int	LMAN1 (int) TMBIM6	false	int	LMAN1 (int) TMBIM6
1892	int	LMAN1 (int) SPTLC1	false	int	LMAN1 (int) SPTLC1
1894	int	LMAN1 (int) DNAJC10	false	int	LMAN1 (int) DNAJC10
1896	int	BAMBI (int) SLC4A7	false	int	BAMBI (int) SLC4A7
1898	int	BAMBI (int) TAF7L	false	int	BAMBI (int) TAF7L
1901	int	PTPRM (int) PROS1	false	int	PTPRM (int) PROS1
1903	int	INPP5D (int) DDR2	false	int	INPP5D (int) DDR2
1906	int	SLC25A12 (int) PRKD1	false	int	SLC25A12 (int) PRKD1
1908	int	SLC25A12 (int) C11orf75	false	int	SLC25A12 (int) C11orf75
1911	int	RBBP8 (int) ENTPD4	false	int	RBBP8 (int) ENTPD4
1913	int	RBBP8 (int) APBB2	false	int	RBBP8 (int) APBB2
1915	int	RBBP8 (int) HEY1	false	int	RBBP8 (int) HEY1
1916	int	ETV5 (int) ACTA2	false	int	ETV5 (int) ACTA2
1918	int	ETV5 (int) NAGA	false	int	ETV5 (int) NAGA
1920	int	ETV5 (int) FAS	false	int	ETV5 (int) FAS
1922	int	ETV5 (int) ETV4	false	int	ETV5 (int) ETV4
1924	int	ETV5 (int) SPRED2	false	int	ETV5 (int) SPRED2
1926	int	ETV5 (int) UBE3B	false	int	ETV5 (int) UBE3B
1928	int	ETV5 (int) LIMD2	false	int	ETV5 (int) LIMD2
1930	int	ETV5 (int) TPK1	false	int	ETV5 (int) TPK1
1933	int	MAD2L1 (int) RFC3	false	int	MAD2L1 (int) RFC3
1935	int	MAD2L1 (int) ARSA	false	int	MAD2L1 (int) ARSA
1937	int	MAD2L1 (int) TTLL1	false	int	MAD2L1 (int) TTLL1
1939	int	MAD2L1 (int) MAGOH	false	int	MAD2L1 (int) MAGOH
1941	int	MAD2L1 (int) ECT2	false	int	MAD2L1 (int) ECT2
1943	int	MAD2L1 (int) RAB4B	false	int	MAD2L1 (int) RAB4B
1945	int	HES1 (int) DKK3	false	int	HES1 (int) DKK3
1947	int	PRPS2 (int) NEFH	false	int	PRPS2 (int) NEFH
1949	int	ARMCX2 (int) PAPSS2	false	int	ARMCX2 (int) PAPSS2
1951	int	ARMCX2 (int) NRGN	false	int	ARMCX2 (int) NRGN
1953	int	ARMCX2 (int) RECK	false	int	ARMCX2 (int) RECK
1954	int	ARMCX2 (int) KCNJ2	false	int	ARMCX2 (int) KCNJ2
1956	int	ARMCX2 (int) IL1RL1	false	int	ARMCX2 (int) IL1RL1
1958	int	ARMCX2 (int) IGFBP3	false	int	ARMCX2 (int) IGFBP3
1960	int	ARMCX2 (int) SULF1	false	int	ARMCX2 (int) SULF1
1962	int	ARMCX2 (int) ARMCX3	false	int	ARMCX2 (int) ARMCX3
1964	int	ARMCX2 (int) STK32B	false	int	ARMCX2 (int) STK32B
1967	int	CCNA2 (int) COL18A1	false	int	CCNA2 (int) COL18A1
1969	int	CCNA2 (int) ZMAT3	false	int	CCNA2 (int) ZMAT3
1972	int	RBP1 (int) CPE	false	int	RBP1 (int) CPE
1974	int	RBP1 (int) FBLN2	false	int	RBP1 (int) FBLN2
1976	int	RBP1 (int) MGMT	false	int	RBP1 (int) MGMT
1978	int	RBP1 (int) CLEC3B	false	int	RBP1 (int) CLEC3B
1980	int	RBP1 (int) NME5	false	int	RBP1 (int) NME5
1982	int	RBP1 (int) CADM1	false	int	RBP1 (int) CADM1
1984	int	RBP1 (int) NDN	false	int	RBP1 (int) NDN
1986	int	RBP1 (int) SALL2	false	int	RBP1 (int) SALL2
1988	int	RBP1 (int) GMDS	false	int	RBP1 (int) GMDS
1991	int	C1orf9 (int) RASSF7	false	int	C1orf9 (int) RASSF7
1993	int	MME (int) SULT1B1	false	int	MME (int) SULT1B1
1994	int	MME (int) DDA1	false	int	MME (int) DDA1
1996	int	CDH2 (int) PALLD	false	int	CDH2 (int) PALLD
1998	int	ABCA1 (int) EFNA1	false	int	ABCA1 (int) EFNA1
2000	int	ABCA1 (int) ZHX2	false	int	ABCA1 (int) ZHX2
2003	int	TNFRSF1B (int) GGT5	false	int	TNFRSF1B (int) GGT5
2005	int	TNFRSF1B (int) ECHDC3	false	int	TNFRSF1B (int) ECHDC3
2008	int	SPG11 (int) ADCY9	false	int	SPG11 (int) ADCY9
2010	int	FANCG (int) DNMT1	false	int	FANCG (int) DNMT1
2013	int	AGL (int) FNBP1L	false	int	AGL (int) FNBP1L
2016	int	TRIM38 (int) PRR3	false	int	TRIM38 (int) PRR3
2018	int	C10orf116 (int) GDF5	false	int	C10orf116 (int) GDF5
2020	int	ZNF185 (int) PLAT	false	int	ZNF185 (int) PLAT
2022	int	ZNF185 (int) MYO5A	false	int	ZNF185 (int) MYO5A
2024	int	ZNF185 (int) SRC	false	int	ZNF185 (int) SRC
2027	int	FSTL3 (int) SMARCD3	false	int	FSTL3 (int) SMARCD3
2029	int	FSTL3 (int) ARRB1	false	int	FSTL3 (int) ARRB1
2032	int	PNO1 (int) C10orf26	false	int	PNO1 (int) C10orf26
2034	int	PNO1 (int) ZCCHC24	false	int	PNO1 (int) ZCCHC24
2036	int	PNO1 (int) MINA	false	int	PNO1 (int) MINA
2038	int	PNO1 (int) C14orf159	false	int	PNO1 (int) C14orf159
2040	int	PNO1 (int) FJX1	false	int	PNO1 (int) FJX1
2042	int	PNO1 (int) SPSB3	false	int	PNO1 (int) SPSB3
2045	int	GPRC5B (int) IQCK	false	int	GPRC5B (int) IQCK
2048	int	MBNL2 (int) TANK	false	int	MBNL2 (int) TANK
2050	int	COBLL1 (int) FAM102A	false	int	COBLL1 (int) FAM102A
2052	int	COBLL1 (int) FAM38B	false	int	COBLL1 (int) FAM38B
2054	int	MAP3K11 (int) ITGB1BP1	false	int	MAP3K11 (int) ITGB1BP1
2056	int	MAP3K11 (int) RABEP2	false	int	MAP3K11 (int) RABEP2
2059	int	TMOD1 (int) KIAA1199	false	int	TMOD1 (int) KIAA1199
2062	int	MAN2C1 (int) EZH1	false	int	MAN2C1 (int) EZH1
2064	int	MAN2C1 (int) FLJ10404	false	int	MAN2C1 (int) FLJ10404
2067	int	PRKAR2B (int) C1orf21	false	int	PRKAR2B (int) C1orf21
2069	int	RFC2 (int) USP1	false	int	RFC2 (int) USP1
2072	int	PDE4B (int) MAN2A1	false	int	PDE4B (int) MAN2A1
2075	int	DPP4 (int) PDLIM1	false	int	DPP4 (int) PDLIM1
2078	int	ALDH4A1 (int) TTC38	false	int	ALDH4A1 (int) TTC38
2081	int	TDG (int) ATF6B	false	int	TDG (int) ATF6B
2084	int	HMGB3 (int) CPSF6	false	int	HMGB3 (int) CPSF6
2087	int	ARHGEF17 (int) NXT2	false	int	ARHGEF17 (int) NXT2
2089	int	ARHGEF17 (int) JAG2	false	int	ARHGEF17 (int) JAG2
2091	int	CTSO (int) PROS1	false	int	CTSO (int) PROS1
2094	int	DLGAP5 (int) ANP32E	false	int	DLGAP5 (int) ANP32E
2096	int	GCA (int) SPHK1	false	int	GCA (int) SPHK1
2099	int	SLC25A13 (int) RRP15	false	int	SLC25A13 (int) RRP15
2101	int	SEMA3C (int) PTPRF	false	int	SEMA3C (int) PTPRF
2102	int	SEMA3C (int) MPP1	false	int	SEMA3C (int) MPP1
2103	int	SEMA3C (int) CDH2	false	int	SEMA3C (int) CDH2
2105	int	SEMA3C (int) SMAD7	false	int	SEMA3C (int) SMAD7
2106	int	SEMA3C (int) BDNF	false	int	SEMA3C (int) BDNF
2108	int	SEMA3C (int) EVI5	false	int	SEMA3C (int) EVI5
2110	int	SEMA3C (int) BTN3A2	false	int	SEMA3C (int) BTN3A2
2112	int	SEMA3C (int) SERPINE2	false	int	SEMA3C (int) SERPINE2
2114	int	SEMA3C (int) ATP13A3	false	int	SEMA3C (int) ATP13A3
2116	int	SEMA3C (int) RND3	false	int	SEMA3C (int) RND3
2118	int	SEMA3C (int) FRY	false	int	SEMA3C (int) FRY
2120	int	SEMA3C (int) LEPREL1	false	int	SEMA3C (int) LEPREL1
2122	int	SEMA3C (int) PDGFC	false	int	SEMA3C (int) PDGFC
2124	int	SEMA3C (int) COL5A2	false	int	SEMA3C (int) COL5A2
2127	int	CD302 (int) TNFSF9	false	int	CD302 (int) TNFSF9
2129	int	CD302 (int) GSK3B	false	int	CD302 (int) GSK3B
2131	int	CD302 (int) KIAA1539	false	int	CD302 (int) KIAA1539
2133	int	CD302 (int) GRAMD1C	false	int	CD302 (int) GRAMD1C
2135	int	CD302 (int) FAT4	false	int	CD302 (int) FAT4
2137	int	CD302 (int) ELK3	false	int	CD302 (int) ELK3
2140	int	DNAJB4 (int) CDKN1B	false	int	DNAJB4 (int) CDKN1B
2142	int	DNAJB4 (int) PPFIBP2	false	int	DNAJB4 (int) PPFIBP2
2144	int	DNAJB4 (int) SAV1	false	int	DNAJB4 (int) SAV1
2146	int	DNAJB4 (int) SLC35C1	false	int	DNAJB4 (int) SLC35C1
2148	int	DNAJB4 (int) SLC39A4	false	int	DNAJB4 (int) SLC39A4
2150	int	DNAJB4 (int) CEND1	false	int	DNAJB4 (int) CEND1
2152	int	DNAJB4 (int) RMND1	false	int	DNAJB4 (int) RMND1
2154	int	SLIT3 (int) ALDH1A3	false	int	SLIT3 (int) ALDH1A3
2157	int	IGF2BP3 (int) NR2F1	false	int	IGF2BP3 (int) NR2F1
2159	int	RGS3 (int) HES1	false	int	RGS3 (int) HES1
2161	int	RGS3 (int) IL32	false	int	RGS3 (int) IL32
2163	int	RGS3 (int) MAP3K5	false	int	RGS3 (int) MAP3K5
2165	int	RGS3 (int) COL4A2	false	int	RGS3 (int) COL4A2
2167	int	RGS3 (int) COL4A1	false	int	RGS3 (int) COL4A1
2169	int	RGS3 (int) TNS3	false	int	RGS3 (int) TNS3
2171	int	RGS3 (int) GLT25D1	false	int	RGS3 (int) GLT25D1
2173	int	RGS3 (int) ARAP3	false	int	RGS3 (int) ARAP3
2176	int	LRRC32 (int) TLX1	false	int	LRRC32 (int) TLX1
2178	int	MAP3K5 (int) RNF10	false	int	MAP3K5 (int) RNF10
2180	int	CFI (int) GPR126	false	int	CFI (int) GPR126
2183	int	ADARB1 (int) RPP38	false	int	ADARB1 (int) RPP38
2185	int	ADARB1 (int) RPL31	false	int	ADARB1 (int) RPL31
2187	int	VCAM1 (int) TNFAIP3	false	int	VCAM1 (int) TNFAIP3
2189	int	PIK3CD (int) NEDD9	false	int	PIK3CD (int) NEDD9
2191	int	PIK3CD (int) CHD7	false	int	PIK3CD (int) CHD7
2194	int	IRF9 (int) XAF1	false	int	IRF9 (int) XAF1
2197	int	DAPK3 (int) TBC1D9	false	int	DAPK3 (int) TBC1D9
2200	int	HEPH (int) DIP2C	false	int	HEPH (int) DIP2C
2203	int	TCEA2 (int) C9orf16	false	int	TCEA2 (int) C9orf16
2205	int	TCEA2 (int) ICA1	false	int	TCEA2 (int) ICA1
2207	int	TCEA2 (int) RP11-138L21.1	false	int	TCEA2 (int) RP11-138L21.1
2210	int	MRPL12 (int) EXOSC5	false	int	MRPL12 (int) EXOSC5
2212	int	MRPL12 (int) METTL8	false	int	MRPL12 (int) METTL8
2214	int	KDR (int) JAK1	false	int	KDR (int) JAK1
2215	int	KDR (int) ADM	false	int	KDR (int) ADM
2216	int	KDR (int) SLIT3	false	int	KDR (int) SLIT3
2218	int	KDR (int) GNG11	false	int	KDR (int) GNG11
2220	int	KDR (int) SLC12A2	false	int	KDR (int) SLC12A2
2221	int	KDR (int) COL18A1	false	int	KDR (int) COL18A1
2223	int	KDR (int) KLF5	false	int	KDR (int) KLF5
2225	int	KDR (int) CHST3	false	int	KDR (int) CHST3
2227	int	KDR (int) NRP2	false	int	KDR (int) NRP2
2229	int	KDR (int) PDE4DIP	false	int	KDR (int) PDE4DIP
2232	int	ARG2 (int) KIF3A	false	int	ARG2 (int) KIF3A
2235	int	CDC6 (int) RBM14	false	int	CDC6 (int) RBM14
2237	int	CDC6 (int) MCM4	false	int	CDC6 (int) MCM4
2238	int	CDC6 (int) ATAD2	false	int	CDC6 (int) ATAD2
2240	int	CDC6 (int) RMI1	false	int	CDC6 (int) RMI1
2242	int	CDC6 (int) RAD54B	false	int	CDC6 (int) RAD54B
2245	int	PEX3 (int) XRCC4	false	int	PEX3 (int) XRCC4
2247	int	PEX3 (int) CYFIP2	false	int	PEX3 (int) CYFIP2
2250	int	CEBPD (int) CBR3	false	int	CEBPD (int) CBR3
2252	int	CHAF1A (int) NFIC	false	int	CHAF1A (int) NFIC
2254	int	FABP4 (int) PTPRE	false	int	FABP4 (int) PTPRE
2256	int	F2R (int) FAM18B	false	int	F2R (int) FAM18B
2259	int	PAWR (int) PTPN22	false	int	PAWR (int) PTPN22
2261	int	PAWR (int) IL13RA2	false	int	PAWR (int) IL13RA2
2264	int	DUSP4 (int) LYRM1	false	int	DUSP4 (int) LYRM1
2266	int	DUSP4 (int) SASH1	false	int	DUSP4 (int) SASH1
2269	int	RFC4 (int) APOBEC3B	false	int	RFC4 (int) APOBEC3B
2271	int	RFC4 (int) KDM5B	false	int	RFC4 (int) KDM5B
2273	int	TRIP13 (int) MELK	false	int	TRIP13 (int) MELK
2275	int	TRIP13 (int) RAD1	false	int	TRIP13 (int) RAD1
2277	int	TRIP13 (int) EXOSC8	false	int	TRIP13 (int) EXOSC8
2280	int	PHACTR2 (int) OSBPL3	false	int	PHACTR2 (int) OSBPL3
2283	int	RARRES3 (int) ANXA4	false	int	RARRES3 (int) ANXA4
2285	int	ENTPD4 (int) TMEFF1	false	int	ENTPD4 (int) TMEFF1
2287	int	NRGN (int) PLSCR4	false	int	NRGN (int) PLSCR4
2288	int	TPM2 (int) UCHL1	false	int	TPM2 (int) UCHL1
2290	int	TPM2 (int) CHN1	false	int	TPM2 (int) CHN1
2293	int	SLC5A6 (int) NOP2	false	int	SLC5A6 (int) NOP2
2296	int	P2RX4 (int) CDK10	false	int	P2RX4 (int) CDK10
2298	int	SMARCD3 (int) MERTK	false	int	SMARCD3 (int) MERTK
2300	int	NRCAM (int) IGF2BP3	false	int	NRCAM (int) IGF2BP3
2302	int	NRCAM (int) PLA2G4A	false	int	NRCAM (int) PLA2G4A
2304	int	NID2 (int) VASH1	false	int	NID2 (int) VASH1
2306	int	NID2 (int) JAM3	false	int	NID2 (int) JAM3
2308	int	GNG11 (int) BET1	false	int	GNG11 (int) BET1
2310	int	GNG11 (int) CASP7	false	int	GNG11 (int) CASP7
2312	int	GNG11 (int) TFPI2	false	int	GNG11 (int) TFPI2
2314	int	GNG11 (int) NOX4	false	int	GNG11 (int) NOX4
2316	int	GNG11 (int) CYB5R2	false	int	GNG11 (int) CYB5R2
2318	int	CDC45L (int) TYMS	false	int	CDC45L (int) TYMS
2320	int	CDC45L (int) TIMELESS	false	int	CDC45L (int) TIMELESS
2321	int	CDC45L (int) RBBP8	false	int	CDC45L (int) RBBP8
2322	int	CDC45L (int) RFC2	false	int	CDC45L (int) RFC2
2324	int	CDC45L (int) ATP6AP1	false	int	CDC45L (int) ATP6AP1
2326	int	CDC45L (int) CDCA4	false	int	CDC45L (int) CDCA4
2328	int	CDC45L (int) GINS2	false	int	CDC45L (int) GINS2
2330	int	PDE2A (int) TNK2	false	int	PDE2A (int) TNK2
2333	int	TPST1 (int) EXT1	false	int	TPST1 (int) EXT1
2335	int	TPST1 (int) GALNT7	false	int	TPST1 (int) GALNT7
2337	int	TUBB2A (int) MAP1A	false	int	TUBB2A (int) MAP1A
2339	int	TUBB2A (int) TNFSF18	false	int	TUBB2A (int) TNFSF18
2342	int	RAD51AP1 (int) GINS1	false	int	RAD51AP1 (int) GINS1
2345	int	MFNG (int) SLC9A1	false	int	MFNG (int) SLC9A1
2347	int	CDKN2C (int) PLAU	false	int	CDKN2C (int) PLAU
2349	int	NDC80 (int) TOP2A	false	int	NDC80 (int) TOP2A
2351	int	NDC80 (int) NCAPG	false	int	NDC80 (int) NCAPG
2354	int	MGST2 (int) SLC7A7	false	int	MGST2 (int) SLC7A7
2356	int	MGST2 (int) RIN2	false	int	MGST2 (int) RIN2
2358	int	MGST2 (int) CLIC3	false	int	MGST2 (int) CLIC3
2360	int	RAB32 (int) NQO2	false	int	RAB32 (int) NQO2
2362	int	GMFG (int) ISG20	false	int	GMFG (int) ISG20
2364	int	GMFG (int) KLF6	false	int	GMFG (int) KLF6
2366	int	SMC2 (int) PSMC3	false	int	SMC2 (int) PSMC3
2367	int	SMC2 (int) LPP	false	int	SMC2 (int) LPP
2369	int	SMC2 (int) EBP	false	int	SMC2 (int) EBP
2370	int	SMC2 (int) ANP32E	false	int	SMC2 (int) ANP32E
2372	int	SMC2 (int) SIDT2	false	int	SMC2 (int) SIDT2
2375	int	DBF4 (int) ARHGAP11A	false	int	DBF4 (int) ARHGAP11A
2377	int	DBF4 (int) FBXO5	false	int	DBF4 (int) FBXO5
2379	int	LMO2 (int) ETS2	false	int	LMO2 (int) ETS2
2381	int	LMO2 (int) NUDT11	false	int	LMO2 (int) NUDT11
2384	int	CDK2 (int) WDR76	false	int	CDK2 (int) WDR76
2385	int	CDK2 (int) POLD3	false	int	CDK2 (int) POLD3
2387	int	CDK2 (int) HRASLS	false	int	CDK2 (int) HRASLS
2389	int	PKMYT1 (int) MET	false	int	PKMYT1 (int) MET
2391	int	PKMYT1 (int) CCHCR1	false	int	PKMYT1 (int) CCHCR1
2394	int	PPP1R3C (int) FAM149B1	false	int	PPP1R3C (int) FAM149B1
2396	int	AMT (int) GABBR1	false	int	AMT (int) GABBR1
2399	int	TECPR2 (int) PRMT2	false	int	TECPR2 (int) PRMT2
2401	int	TECPR2 (int) SIN3B	false	int	TECPR2 (int) SIN3B
2403	int	TECPR2 (int) MKNK2	false	int	TECPR2 (int) MKNK2
2406	int	CREB1 (int) MAPK1	false	int	CREB1 (int) MAPK1
2409	int	GTSE1 (int) CBX5	false	int	GTSE1 (int) CBX5
2412	int	TMC6 (int) SYNGR2	false	int	TMC6 (int) SYNGR2
2414	int	SEC23A (int) MARCH7	false	int	SEC23A (int) MARCH7
2415	int	SEC23A (int) CREB1	false	int	SEC23A (int) CREB1
2417	int	SEC23A (int) MAP3K7IP2	false	int	SEC23A (int) MAP3K7IP2
2419	int	SEC23A (int) PICALM	false	int	SEC23A (int) PICALM
2422	int	AK3L1 (int) PXMP4	false	int	AK3L1 (int) PXMP4
2423	int	FLRT2 (int) HEPH	false	int	FLRT2 (int) HEPH
2425	int	FLRT2 (int) TMEM158	false	int	FLRT2 (int) TMEM158
2427	int	FLRT2 (int) CDKN1C	false	int	FLRT2 (int) CDKN1C
2428	int	FLRT2 (int) ZDHHC13	false	int	FLRT2 (int) ZDHHC13
2430	int	FLRT2 (int) MAGED4	false	int	FLRT2 (int) MAGED4
2432	int	PIK3CA (int) EXD2	false	int	PIK3CA (int) EXD2
2434	int	GRK5 (int) KDR	false	int	GRK5 (int) KDR
2436	int	GRK5 (int) GLYR1	false	int	GRK5 (int) GLYR1
2437	int	IFI6 (int) MX1	false	int	IFI6 (int) MX1
2439	int	IFI6 (int) IFI27	false	int	IFI6 (int) IFI27
2440	int	IFI6 (int) IRF9	false	int	IFI6 (int) IRF9
2442	int	IFI6 (int) OAS2	false	int	IFI6 (int) OAS2
2444	int	IFI6 (int) ISG15	false	int	IFI6 (int) ISG15
2447	int	GALC (int) SLC17A9	false	int	GALC (int) SLC17A9
2449	int	FOSL1 (int) C9orf95	false	int	FOSL1 (int) C9orf95
2451	int	FOSL1 (int) SPRY4	false	int	FOSL1 (int) SPRY4
2454	int	FGF2 (int) GPR176	false	int	FGF2 (int) GPR176
2455	int	TMED2 (int) CAPRIN1	false	int	TMED2 (int) CAPRIN1
2456	int	TMED2 (int) SSR1	false	int	TMED2 (int) SSR1
2457	int	TMED2 (int) CLINT1	false	int	TMED2 (int) CLINT1
2458	int	TMED2 (int) LMAN1	false	int	TMED2 (int) LMAN1
2459	int	TMED2 (int) SEC23A	false	int	TMED2 (int) SEC23A
2461	int	TMED2 (int) SNAP23	false	int	TMED2 (int) SNAP23
2463	int	TMED2 (int) CEP250	false	int	TMED2 (int) CEP250
2465	int	TMED2 (int) CDV3	false	int	TMED2 (int) CDV3
2467	int	TMED2 (int) SLC35E2	false	int	TMED2 (int) SLC35E2
2469	int	TMED2 (int) TWSG1	false	int	TMED2 (int) TWSG1
2471	int	LCAT (int) TRIM38	false	int	LCAT (int) TRIM38
2474	int	NUPL1 (int) INO80B	false	int	NUPL1 (int) INO80B
2477	int	KIF11 (int) E2F8	false	int	KIF11 (int) E2F8
2480	int	SNCA (int) GYPC	false	int	SNCA (int) GYPC
2482	int	SNCA (int) PGAP1	false	int	SNCA (int) PGAP1
2485	int	CXCL1 (int) RNF41	false	int	CXCL1 (int) RNF41
2486	int	CXCL1 (int) TNFAIP3	false	int	CXCL1 (int) TNFAIP3
2488	int	CXCL1 (int) IL8	false	int	CXCL1 (int) IL8
2489	int	CXCL1 (int) VCAM1	false	int	CXCL1 (int) VCAM1
2491	int	CXCL1 (int) IL6	false	int	CXCL1 (int) IL6
2492	int	CXCL1 (int) CXCL6	false	int	CXCL1 (int) CXCL6
2494	int	CXCL1 (int) CXCL3	false	int	CXCL1 (int) CXCL3
2495	int	CXCL1 (int) CXCL2	false	int	CXCL1 (int) CXCL2
2498	int	MMP1 (int) MMP10	false	int	MMP1 (int) MMP10
2500	int	C9orf16 (int) LY6G5C	false	int	C9orf16 (int) LY6G5C
2502	int	PIK3C2B (int) ODZ3	false	int	PIK3C2B (int) ODZ3
2505	int	EPB49 (int) SLC2A1	false	int	EPB49 (int) SLC2A1
2507	int	ELMO1 (int) CYB5B	false	int	ELMO1 (int) CYB5B
2510	int	C12orf24 (int) CD99	false	int	C12orf24 (int) CD99
2512	int	TBC1D8 (int) DPYSL2	false	int	TBC1D8 (int) DPYSL2
2513	int	TBC1D8 (int) CD93	false	int	TBC1D8 (int) CD93
2515	int	TBC1D8 (int) CSTF3	false	int	TBC1D8 (int) CSTF3
2516	int	TBC1D8 (int) C12orf24	false	int	TBC1D8 (int) C12orf24
2517	int	TBC1D8 (int) TAGLN	false	int	TBC1D8 (int) TAGLN
2519	int	TBC1D8 (int) ITGA10	false	int	TBC1D8 (int) ITGA10
2521	int	TBC1D8 (int) MEF2C	false	int	TBC1D8 (int) MEF2C
2523	int	TBC1D8 (int) UAP1	false	int	TBC1D8 (int) UAP1
2525	int	TBC1D8 (int) CEBPB	false	int	TBC1D8 (int) CEBPB
2527	int	TBC1D8 (int) ANGPTL2	false	int	TBC1D8 (int) ANGPTL2
2529	int	TBC1D8 (int) PLCB1	false	int	TBC1D8 (int) PLCB1
2530	int	TBC1D8 (int) TBC1D15	false	int	TBC1D8 (int) TBC1D15
2532	int	TBC1D8 (int) CSGALNACT1	false	int	TBC1D8 (int) CSGALNACT1
2534	int	TBC1D8 (int) NEIL1	false	int	TBC1D8 (int) NEIL1
2536	int	TBC1D8 (int) GIMAP6	false	int	TBC1D8 (int) GIMAP6
2538	int	TBC1D8 (int) APOL3	false	int	TBC1D8 (int) APOL3
2540	int	MYO5A (int) DISC1	false	int	MYO5A (int) DISC1
2543	int	TOX (int) MEST	false	int	TOX (int) MEST
2544	int	TOX (int) GMFG	false	int	TOX (int) GMFG
2546	int	TOX (int) TNIK	false	int	TOX (int) TNIK
2548	int	BRCA1 (int) BRCA2	false	int	BRCA1 (int) BRCA2
2551	int	REST (int) MAP4	false	int	REST (int) MAP4
2554	int	FKBP5 (int) IPO8	false	int	FKBP5 (int) IPO8
2556	int	FKBP5 (int) GLE1	false	int	FKBP5 (int) GLE1
2558	int	FKBP5 (int) SMCHD1	false	int	FKBP5 (int) SMCHD1
2560	int	FKBP5 (int) TRRAP	false	int	FKBP5 (int) TRRAP
2561	int	FKBP5 (int) U2AF2	false	int	FKBP5 (int) U2AF2
2562	int	SELL (int) WSB1	false	int	SELL (int) WSB1
2564	int	SELL (int) F5	false	int	SELL (int) F5
2566	int	SELL (int) SELP	false	int	SELL (int) SELP
2568	int	PPM1D (int) ISOC2	false	int	PPM1D (int) ISOC2
2571	int	STC1 (int) VDR	false	int	STC1 (int) VDR
2574	int	PFTK1 (int) STX1A	false	int	PFTK1 (int) STX1A
2576	int	ACD (int) OGG1	false	int	ACD (int) OGG1
2578	int	ACD (int) DAG1	false	int	ACD (int) DAG1
2580	int	ACD (int) DRAM1	false	int	ACD (int) DRAM1
2582	int	ACD (int) HNRNPUL2	false	int	ACD (int) HNRNPUL2
2584	int	ACD (int) TEAD4	false	int	ACD (int) TEAD4
2586	int	RPS6KA5 (int) FAM117A	false	int	RPS6KA5 (int) FAM117A
2588	int	ADA (int) PLLP	false	int	ADA (int) PLLP
2590	int	NEK2 (int) CCNB2	false	int	NEK2 (int) CCNB2
2592	int	NEK2 (int) BUB1B	false	int	NEK2 (int) BUB1B
2594	int	NEK2 (int) TTK	false	int	NEK2 (int) TTK
2596	int	NEK2 (int) CENPE	false	int	NEK2 (int) CENPE
2598	int	NEK2 (int) AURKA	false	int	NEK2 (int) AURKA
2600	int	NEK2 (int) KIF2C	false	int	NEK2 (int) KIF2C
2602	int	NEK2 (int) CKAP2	false	int	NEK2 (int) CKAP2
2604	int	NEK2 (int) DEPDC1	false	int	NEK2 (int) DEPDC1
2606	int	NEK2 (int) RACGAP1	false	int	NEK2 (int) RACGAP1
2609	int	TFAP2A (int) CYB561	false	int	TFAP2A (int) CYB561
2612	int	RAPGEF5 (int) GBP1	false	int	RAPGEF5 (int) GBP1
2615	int	LTBP2 (int) LIPG	false	int	LTBP2 (int) LIPG
2617	int	CDC25A (int) CDC6	false	int	CDC25A (int) CDC6
2618	int	CDC25A (int) PKMYT1	false	int	CDC25A (int) PKMYT1
2620	int	CDC25A (int) HELLS	false	int	CDC25A (int) HELLS
2622	int	NCK1 (int) GALC	false	int	NCK1 (int) GALC
2624	int	NCK1 (int) B3GNT2	false	int	NCK1 (int) B3GNT2
2626	int	NCK1 (int) TMEM22	false	int	NCK1 (int) TMEM22
2629	int	TGFBR3 (int) ZFP36L2	false	int	TGFBR3 (int) ZFP36L2
2631	int	TGFBR3 (int) SIRPA	false	int	TGFBR3 (int) SIRPA
2633	int	TGFBR3 (int) LIPT1	false	int	TGFBR3 (int) LIPT1
2635	int	TGFBR3 (int) LY75	false	int	TGFBR3 (int) LY75
2637	int	TGFBR3 (int) CLU	false	int	TGFBR3 (int) CLU
2639	int	IFIT3 (int) STOM	false	int	IFIT3 (int) STOM
2641	int	IFIT3 (int) EGR1	false	int	IFIT3 (int) EGR1
2642	int	IFIT3 (int) SMURF2	false	int	IFIT3 (int) SMURF2
2644	int	IFIT3 (int) IFI35	false	int	IFIT3 (int) IFI35
2646	int	IFIT3 (int) HERC6	false	int	IFIT3 (int) HERC6
2648	int	PARP2 (int) RBBP8	false	int	PARP2 (int) RBBP8
2649	int	PARP2 (int) BRCA1	false	int	PARP2 (int) BRCA1
2651	int	PARP2 (int) RAD51	false	int	PARP2 (int) RAD51
2653	int	PARP2 (int) RAD51C	false	int	PARP2 (int) RAD51C
2655	int	PARP2 (int) TUBD1	false	int	PARP2 (int) TUBD1
2657	int	PARP2 (int) BTG3	false	int	PARP2 (int) BTG3
2659	int	FEN1 (int) CDC25A	false	int	FEN1 (int) CDC25A
2660	int	FEN1 (int) PARP2	false	int	FEN1 (int) PARP2
2662	int	FEN1 (int) CDT1	false	int	FEN1 (int) CDT1
2664	int	FEN1 (int) POLE	false	int	FEN1 (int) POLE
2666	int	FEN1 (int) DSCC1	false	int	FEN1 (int) DSCC1
2667	int	FAS (int) ACTA2	false	int	FAS (int) ACTA2
2669	int	FAS (int) TIMP1	false	int	FAS (int) TIMP1
2671	int	SMAD7 (int) BCL3	false	int	SMAD7 (int) BCL3
2673	int	SMAD7 (int) AMPH	false	int	SMAD7 (int) AMPH
2675	int	SMAD7 (int) SMAD6	false	int	SMAD7 (int) SMAD6
2677	int	SMAD7 (int) PTGIS	false	int	SMAD7 (int) PTGIS
2679	int	SMAD7 (int) CORO2B	false	int	SMAD7 (int) CORO2B
2681	int	SMAD7 (int) CCRL2	false	int	SMAD7 (int) CCRL2
2683	int	SMAD7 (int) ATP2B4	false	int	SMAD7 (int) ATP2B4
2685	int	SMAD7 (int) BMPR1A	false	int	SMAD7 (int) BMPR1A
2688	int	H1FX (int) GIT2	false	int	H1FX (int) GIT2
2690	int	TTK (int) KIAA0564	false	int	TTK (int) KIAA0564
2692	int	TTK (int) VPS13B	false	int	TTK (int) VPS13B
2693	int	MELK (int) RAD21	false	int	MELK (int) RAD21
2695	int	MELK (int) MYBL2	false	int	MELK (int) MYBL2
2697	int	MELK (int) TAF5	false	int	MELK (int) TAF5
2699	int	MELK (int) CENPI	false	int	MELK (int) CENPI
2702	int	CCNF (int) KIFC1	false	int	CCNF (int) KIFC1
2703	int	POLA1 (int) ENC1	false	int	POLA1 (int) ENC1
2705	int	POLA1 (int) USP13	false	int	POLA1 (int) USP13
2707	int	POLA1 (int) MAGED2	false	int	POLA1 (int) MAGED2
2709	int	POLA1 (int) HIST1H2AC	false	int	POLA1 (int) HIST1H2AC
2712	int	POP5 (int) QPCT	false	int	POP5 (int) QPCT
2714	int	POP5 (int) MDK	false	int	POP5 (int) MDK
2716	int	POP5 (int) ATR	false	int	POP5 (int) ATR
2718	int	POP5 (int) MDN1	false	int	POP5 (int) MDN1
2720	int	POP5 (int) IP6K2	false	int	POP5 (int) IP6K2
2722	int	POP5 (int) C16orf53	false	int	POP5 (int) C16orf53
2724	int	POP5 (int) RSRC1	false	int	POP5 (int) RSRC1
2726	int	POP5 (int) TSEN2	false	int	POP5 (int) TSEN2
2728	int	POP5 (int) COQ3	false	int	POP5 (int) COQ3
2731	int	GPR162 (int) SCARB1	false	int	GPR162 (int) SCARB1
2732	int	PLK4 (int) PLD3	false	int	PLK4 (int) PLD3
2733	int	PLK4 (int) RAD51AP1	false	int	PLK4 (int) RAD51AP1
2734	int	PLK4 (int) CDK2	false	int	PLK4 (int) CDK2
2736	int	PLK4 (int) BMP1	false	int	PLK4 (int) BMP1
2738	int	PLK4 (int) LARP6	false	int	PLK4 (int) LARP6
2740	int	PLK4 (int) TRPM4	false	int	PLK4 (int) TRPM4
2742	int	PLK4 (int) MARK4	false	int	PLK4 (int) MARK4
2744	int	SAP30 (int) DUSP3	false	int	SAP30 (int) DUSP3
2745	int	SAP30 (int) SMC3	false	int	SAP30 (int) SMC3
2747	int	SAP30 (int) AACS	false	int	SAP30 (int) AACS
2750	int	ZNF274 (int) GPATCH2	false	int	ZNF274 (int) GPATCH2
2752	int	ZNF274 (int) C12orf5	false	int	ZNF274 (int) C12orf5
2754	int	ZNF274 (int) CNNM3	false	int	ZNF274 (int) CNNM3
2757	int	CARD8 (int) DDX17	false	int	CARD8 (int) DDX17
2759	int	CENPA (int) UBE2C	false	int	CENPA (int) UBE2C
2760	int	CENPA (int) DBF4	false	int	CENPA (int) DBF4
2761	int	CENPA (int) FBXO5	false	int	CENPA (int) FBXO5
2763	int	CENPA (int) ERCC6L	false	int	CENPA (int) ERCC6L
2765	int	CENPA (int) ESPL1	false	int	CENPA (int) ESPL1
2768	int	DDX10 (int) PLEK2	false	int	DDX10 (int) PLEK2
2771	int	SLC22A18 (int) IL10RB	false	int	SLC22A18 (int) IL10RB
2773	int	GIT2 (int) H1F0	false	int	GIT2 (int) H1F0
2776	int	TRAPPC6A (int) ABLIM1	false	int	TRAPPC6A (int) ABLIM1
2778	int	TRAPPC6A (int) LBA1	false	int	TRAPPC6A (int) LBA1
2781	int	ITGB4 (int) MEF2A	false	int	ITGB4 (int) MEF2A
2782	int	ATF5 (int) RANBP2	false	int	ATF5 (int) RANBP2
2784	int	DDX3Y (int) EIF1AY	false	int	DDX3Y (int) EIF1AY
2786	int	DDX3Y (int) KDM5D	false	int	DDX3Y (int) KDM5D
2788	int	DDX3Y (int) XIST	false	int	DDX3Y (int) XIST
2790	int	AHDC1 (int) TBC1D5	false	int	AHDC1 (int) TBC1D5
2792	int	AHDC1 (int) PRKD2	false	int	AHDC1 (int) PRKD2
2795	int	DOCK4 (int) SH3BP5	false	int	DOCK4 (int) SH3BP5
2797	int	DOCK4 (int) SEMA5A	false	int	DOCK4 (int) SEMA5A
2799	int	DOCK4 (int) OSBPL10	false	int	DOCK4 (int) OSBPL10
2801	int	DOCK4 (int) MGAT4A	false	int	DOCK4 (int) MGAT4A
2803	int	DOCK4 (int) ARHGAP24	false	int	DOCK4 (int) ARHGAP24
2805	int	NMT2 (int) RPP38	false	int	NMT2 (int) RPP38
2807	int	NMT2 (int) FAM171A1	false	int	NMT2 (int) FAM171A1
2809	int	NMT2 (int) RPP25	false	int	NMT2 (int) RPP25
2812	int	ADORA2A (int) SLC16A5	false	int	ADORA2A (int) SLC16A5
2814	int	ADORA2A (int) DHRS4	false	int	ADORA2A (int) DHRS4
2816	int	RAD51 (int) ACYP1	false	int	RAD51 (int) ACYP1
2817	int	CENPE (int) SPAG5	false	int	CENPE (int) SPAG5
2819	int	CENPE (int) SKA1	false	int	CENPE (int) SKA1
2821	int	ASNS (int) PHGDH	false	int	ASNS (int) PHGDH
2822	int	ASNS (int) PCK2	false	int	ASNS (int) PCK2
2823	int	ASNS (int) PSAT1	false	int	ASNS (int) PSAT1
2824	int	XRCC4 (int) IDH3A	false	int	XRCC4 (int) IDH3A
2825	int	XRCC4 (int) PEX3	false	int	XRCC4 (int) PEX3
2827	int	XRCC4 (int) DIMT1L	false	int	XRCC4 (int) DIMT1L
2828	int	RECQL (int) RAB11A	false	int	RECQL (int) RAB11A
2830	int	MAN2A1 (int) PLS1	false	int	MAN2A1 (int) PLS1
2832	int	EFNA4 (int) RANBP17	false	int	EFNA4 (int) RANBP17
2834	int	TMEFF1 (int) EML2	false	int	TMEFF1 (int) EML2
2837	int	PTGS1 (int) AP1S2	false	int	PTGS1 (int) AP1S2
2839	int	PTGS1 (int) SOCS2	false	int	PTGS1 (int) SOCS2
2841	int	PTGS1 (int) NFIL3	false	int	PTGS1 (int) NFIL3
2842	int	PTGS1 (int) TPST1	false	int	PTGS1 (int) TPST1
2844	int	PTGS1 (int) SMYD2	false	int	PTGS1 (int) SMYD2
2846	int	PTGS1 (int) ENOX1	false	int	PTGS1 (int) ENOX1
2848	int	KAL1 (int) TOX	false	int	KAL1 (int) TOX
2849	int	KAL1 (int) TFAP2A	false	int	KAL1 (int) TFAP2A
2851	int	KAL1 (int) SLC24A1	false	int	KAL1 (int) SLC24A1
2852	int	IL6 (int) PTGS2	false	int	IL6 (int) PTGS2
2854	int	TGFBRAP1 (int) ECE1	false	int	TGFBRAP1 (int) ECE1
2856	int	TGFBRAP1 (int) MAD1L1	false	int	TGFBRAP1 (int) MAD1L1
2858	int	TGFBRAP1 (int) SLC38A2	false	int	TGFBRAP1 (int) SLC38A2
2860	int	TGFBRAP1 (int) TMEM51	false	int	TGFBRAP1 (int) TMEM51
2862	int	TGFBRAP1 (int) UBTD1	false	int	TGFBRAP1 (int) UBTD1
2864	int	TIMM8A (int) GLA	false	int	TIMM8A (int) GLA
2866	int	TIMM8A (int) HOMER3	false	int	TIMM8A (int) HOMER3
2869	int	SURF2 (int) GLDC	false	int	SURF2 (int) GLDC
2871	int	TRMT2B (int) SSR3	false	int	TRMT2B (int) SSR3
2874	int	GPSM2 (int) SPARC	false	int	GPSM2 (int) SPARC
2875	int	GPSM2 (int) HMGB3	false	int	GPSM2 (int) HMGB3
2878	int	PARD6A (int) FKTN	false	int	PARD6A (int) FKTN
2880	int	PARD6A (int) STARD8	false	int	PARD6A (int) STARD8
2883	int	NOTCH4 (int) MCAM	false	int	NOTCH4 (int) MCAM
2885	int	NR3C2 (int) CD302	false	int	NR3C2 (int) CD302
2887	int	NR3C2 (int) CSTF2T	false	int	NR3C2 (int) CSTF2T
2889	int	ACYP1 (int) DR1	false	int	ACYP1 (int) DR1
2891	int	BMP2 (int) SERPINB2	false	int	BMP2 (int) SERPINB2
2893	int	BMP2 (int) PPAP2B	false	int	BMP2 (int) PPAP2B
2896	int	MN1 (int) SYNC	false	int	MN1 (int) SYNC
2899	int	BARD1 (int) GINS3	false	int	BARD1 (int) GINS3
2901	int	TMSB15A (int) CSRP2	false	int	TMSB15A (int) CSRP2
2903	int	TMSB15A (int) TMSB15B	false	int	TMSB15A (int) TMSB15B
2905	int	HOXB6 (int) SYNGR2	false	int	HOXB6 (int) SYNGR2
2907	int	HOXB6 (int) HOXB7	false	int	HOXB6 (int) HOXB7
2909	int	HOXB6 (int) HOXB5	false	int	HOXB6 (int) HOXB5
2911	int	LRRC17 (int) PRKAR2B	false	int	LRRC17 (int) PRKAR2B
2913	int	CCL14 (int) CCL23	false	int	CCL14 (int) CCL23
2915	int	AGPS (int) GMFB	false	int	AGPS (int) GMFB
2917	int	AGPS (int) ELL2	false	int	AGPS (int) ELL2
2919	int	AGPS (int) PRKAG2	false	int	AGPS (int) PRKAG2
2921	int	SEMA5A (int) SYNGR1	false	int	SEMA5A (int) SYNGR1
2922	int	RECK (int) CYBA	false	int	RECK (int) CYBA
2923	int	RECK (int) BAMBI	false	int	RECK (int) BAMBI
2924	int	RECK (int) TOX	false	int	RECK (int) TOX
2926	int	RECK (int) CROT	false	int	RECK (int) CROT
2928	int	RECK (int) ERCC6	false	int	RECK (int) ERCC6
2930	int	RECK (int) PGRMC2	false	int	RECK (int) PGRMC2
2932	int	RECK (int) EVL	false	int	RECK (int) EVL
2934	int	RECK (int) PHF10	false	int	RECK (int) PHF10
2936	int	RECK (int) SPATA7	false	int	RECK (int) SPATA7
2938	int	DAG1 (int) SEC22B	false	int	DAG1 (int) SEC22B
2941	int	FES (int) OBFC1	false	int	FES (int) OBFC1
2944	int	ATF2 (int) TIA1	false	int	ATF2 (int) TIA1
2945	int	ATF2 (int) SMAD4	false	int	ATF2 (int) SMAD4
2947	int	ATF2 (int) FNDC3A	false	int	ATF2 (int) FNDC3A
2948	int	PLAU (int) BHLHE40	false	int	PLAU (int) BHLHE40
2950	int	PLAU (int) SGK1	false	int	PLAU (int) SGK1
2951	int	PLAU (int) FHL2	false	int	PLAU (int) FHL2
2953	int	PLAU (int) TLE1	false	int	PLAU (int) TLE1
2954	int	PLAU (int) PIK3CD	false	int	PLAU (int) PIK3CD
2956	int	PLAU (int) EMP2	false	int	PLAU (int) EMP2
2958	int	PLAU (int) ZNF175	false	int	PLAU (int) ZNF175
2959	int	PLAU (int) SMURF2	false	int	PLAU (int) SMURF2
2961	int	PLAU (int) RUNX1	false	int	PLAU (int) RUNX1
2963	int	PLAU (int) MALT1	false	int	PLAU (int) MALT1
2964	int	PLAU (int) GALNT10	false	int	PLAU (int) GALNT10
2966	int	PLAU (int) PIP5K1C	false	int	PLAU (int) PIP5K1C
2968	int	PLAU (int) SATB2	false	int	PLAU (int) SATB2
2970	int	PLAU (int) PPP1R13L	false	int	PLAU (int) PPP1R13L
2973	int	SCN1B (int) RIPK2	false	int	SCN1B (int) RIPK2
2975	int	SCN1B (int) C1orf27	false	int	SCN1B (int) C1orf27
2977	int	PCDH7 (int) GFPT2	false	int	PCDH7 (int) GFPT2
2979	int	PCDH7 (int) C9orf3	false	int	PCDH7 (int) C9orf3
2981	int	PCDH7 (int) PLEKHO1	false	int	PCDH7 (int) PLEKHO1
2983	int	PCDH7 (int) PCDH9	false	int	PCDH7 (int) PCDH9
2985	int	TAGLN (int) PHEX	false	int	TAGLN (int) PHEX
2988	int	CHST1 (int) MYO1B	false	int	CHST1 (int) MYO1B
2990	int	CHST1 (int) GPR116	false	int	CHST1 (int) GPR116
2992	int	CHST1 (int) TSPAN13	false	int	CHST1 (int) TSPAN13
2995	int	LAMP3 (int) TNNT1	false	int	LAMP3 (int) TNNT1
2997	int	LAMP3 (int) ECHDC2	false	int	LAMP3 (int) ECHDC2
2999	int	LAMP3 (int) IER5	false	int	LAMP3 (int) IER5
3000	int	ANGPT2 (int) RNF13	false	int	ANGPT2 (int) RNF13
3001	int	HRH1 (int) PAWR	false	int	HRH1 (int) PAWR
3003	int	HRH1 (int) CIDEB	false	int	HRH1 (int) CIDEB
3005	int	NOS3 (int) ABCG2	false	int	NOS3 (int) ABCG2
3006	int	SMURF2 (int) DUSP1	false	int	SMURF2 (int) DUSP1
3007	int	SMURF2 (int) TNFRSF1B	false	int	SMURF2 (int) TNFRSF1B
3008	int	SMURF2 (int) ARG2	false	int	SMURF2 (int) ARG2
3010	int	SMURF2 (int) SLC26A2	false	int	SMURF2 (int) SLC26A2
3011	int	SMURF2 (int) MEF2C	false	int	SMURF2 (int) MEF2C
3013	int	SMURF2 (int) PLXNA2	false	int	SMURF2 (int) PLXNA2
3015	int	SMURF2 (int) EDC3	false	int	SMURF2 (int) EDC3
3017	int	HOXB5 (int) POU4F1	false	int	HOXB5 (int) POU4F1
3019	int	TNFSF12 (int) KANK2	false	int	TNFSF12 (int) KANK2
3022	int	MMRN1 (int) CSF2RB	false	int	MMRN1 (int) CSF2RB
3023	int	MMRN1 (int) EMCN	false	int	MMRN1 (int) EMCN
3025	int	MMRN1 (int) CCRL1	false	int	MMRN1 (int) CCRL1
3027	int	MMRN1 (int) PLEKHA5	false	int	MMRN1 (int) PLEKHA5
3029	int	PRRG1 (int) DNAJB9	false	int	PRRG1 (int) DNAJB9
3031	int	TTLL1 (int) MBOAT7	false	int	TTLL1 (int) MBOAT7
3033	int	TTLL1 (int) ABAT	false	int	TTLL1 (int) ABAT
3036	int	PCDH17 (int) PALM	false	int	PCDH17 (int) PALM
3039	int	BCL2A1 (int) USP18	false	int	BCL2A1 (int) USP18
3041	int	IPO8 (int) ARF6	false	int	IPO8 (int) ARF6
3044	int	DIAPH2 (int) ITPKB	false	int	DIAPH2 (int) ITPKB
3047	int	OSMR (int) HCFC1R1	false	int	OSMR (int) HCFC1R1
3050	int	ABLIM3 (int) RANGAP1	false	int	ABLIM3 (int) RANGAP1
3053	int	BLM (int) FUCA1	false	int	BLM (int) FUCA1
3055	int	BLM (int) KNTC1	false	int	BLM (int) KNTC1
3057	int	CYP1A1 (int) TGFBI	false	int	CYP1A1 (int) TGFBI
3058	int	CYP1A1 (int) EDC3	false	int	CYP1A1 (int) EDC3
3060	int	IL7R (int) SERTAD2	false	int	IL7R (int) SERTAD2
3062	int	IL7R (int) FAM46A	false	int	IL7R (int) FAM46A
3064	int	WASL (int) MYST4	false	int	WASL (int) MYST4
3066	int	POLE2 (int) HAT1	false	int	POLE2 (int) HAT1
3067	int	POLE2 (int) RFC4	false	int	POLE2 (int) RFC4
3068	int	POLE2 (int) SMC2	false	int	POLE2 (int) SMC2
3069	int	POLE2 (int) SAP30	false	int	POLE2 (int) SAP30
3071	int	POLE2 (int) GINS4	false	int	POLE2 (int) GINS4
3073	int	SETBP1 (int) IL33	false	int	SETBP1 (int) IL33
3075	int	SETBP1 (int) SOX18	false	int	SETBP1 (int) SOX18
3077	int	SETBP1 (int) GNA14	false	int	SETBP1 (int) GNA14
3080	int	PLCL1 (int) CAMK2N1	false	int	PLCL1 (int) CAMK2N1
3081	int	NMU (int) HRASLS	false	int	NMU (int) HRASLS
3082	int	DISC1 (int) SNCA	false	int	DISC1 (int) SNCA
3084	int	DISC1 (int) NOL12	false	int	DISC1 (int) NOL12
3086	int	DISC1 (int) SEPT6	false	int	DISC1 (int) SEPT6
3088	int	DISC1 (int) IL27RA	false	int	DISC1 (int) IL27RA
3091	int	PRKCH (int) BMX	false	int	PRKCH (int) BMX
3093	int	PRKCH (int) UTRN	false	int	PRKCH (int) UTRN
3095	int	PRKCH (int) ITGA6	false	int	PRKCH (int) ITGA6
3097	int	PRKCH (int) RNF19A	false	int	PRKCH (int) RNF19A
3098	int	GINS1 (int) RRM1	false	int	GINS1 (int) RRM1
3100	int	GINS1 (int) KIAA0101	false	int	GINS1 (int) KIAA0101
3101	int	GINS1 (int) BLM	false	int	GINS1 (int) BLM
3102	int	GINS1 (int) POLE2	false	int	GINS1 (int) POLE2
3104	int	GINS1 (int) NCAPD3	false	int	GINS1 (int) NCAPD3
3106	int	GINS1 (int) PSMC3IP	false	int	GINS1 (int) PSMC3IP
3108	int	GINS1 (int) GMNN	false	int	GINS1 (int) GMNN
3110	int	GINS1 (int) MCM10	false	int	GINS1 (int) MCM10
3112	int	RAB5A (int) VAMP3	false	int	RAB5A (int) VAMP3
3114	int	XAF1 (int) OAS1	false	int	XAF1 (int) OAS1
3115	int	IL3RA (int) LMO2	false	int	IL3RA (int) LMO2
3116	int	IL3RA (int) LDB2	false	int	IL3RA (int) LDB2
3118	int	IL3RA (int) ENTPD1	false	int	IL3RA (int) ENTPD1
3120	int	IL3RA (int) SORT1	false	int	IL3RA (int) SORT1
3123	int	GABPB1 (int) PLSCR1	false	int	GABPB1 (int) PLSCR1
3126	int	GRB14 (int) PSTPIP2	false	int	GRB14 (int) PSTPIP2
3128	int	GRB14 (int) POLM	false	int	GRB14 (int) POLM
3131	int	GPR4 (int) EIF5B	false	int	GPR4 (int) EIF5B
3133	int	GPR4 (int) KIAA0141	false	int	GPR4 (int) KIAA0141
3134	int	GPR4 (int) CCDC86	false	int	GPR4 (int) CCDC86
3136	int	GPR4 (int) CEBPG	false	int	GPR4 (int) CEBPG
3138	int	GPR4 (int) SOLH	false	int	GPR4 (int) SOLH
3140	int	GPR4 (int) RCBTB2	false	int	GPR4 (int) RCBTB2
3142	int	GPR4 (int) DDX21	false	int	GPR4 (int) DDX21
3144	int	GPR4 (int) PWP2	false	int	GPR4 (int) PWP2
3146	int	GPR4 (int) SMAGP	false	int	GPR4 (int) SMAGP
3148	int	GPR4 (int) PDCD11	false	int	GPR4 (int) PDCD11
3150	int	GPR4 (int) KLC1	false	int	GPR4 (int) KLC1
3152	int	GPR4 (int) GATAD2A	false	int	GPR4 (int) GATAD2A
3154	int	GPR4 (int) C2orf18	false	int	GPR4 (int) C2orf18
3157	int	HOXA4 (int) GATA3	false	int	HOXA4 (int) GATA3
3160	int	KIF14 (int) KIF23	false	int	KIF14 (int) KIF23
3162	int	G3BP2 (int) SLC16A1	false	int	G3BP2 (int) SLC16A1
3164	int	G3BP2 (int) NRAS	false	int	G3BP2 (int) NRAS
3165	int	G3BP2 (int) NCK1	false	int	G3BP2 (int) NCK1
3167	int	PDE3A (int) CNN2	false	int	PDE3A (int) CNN2
3169	int	BMX (int) WDR5B	false	int	BMX (int) WDR5B
3170	int	LDB2 (int) ETS2	false	int	LDB2 (int) ETS2
3172	int	LDB2 (int) C16orf88	false	int	LDB2 (int) C16orf88
3175	int	RCC1 (int) PEX12	false	int	RCC1 (int) PEX12
3177	int	RCC1 (int) ACYP2	false	int	RCC1 (int) ACYP2
3179	int	RCC1 (int) ZMYND8	false	int	RCC1 (int) ZMYND8
3181	int	RCC1 (int) TNFRSF10C	false	int	RCC1 (int) TNFRSF10C
3183	int	RCC1 (int) ZKSCAN1	false	int	RCC1 (int) ZKSCAN1
3185	int	RCC1 (int) ZNF277	false	int	RCC1 (int) ZNF277
3187	int	RCC1 (int) ZNF14	false	int	RCC1 (int) ZNF14
3190	int	NUP155 (int) PRKAB1	false	int	NUP155 (int) PRKAB1
3192	int	NUP155 (int) NUP98	false	int	NUP155 (int) NUP98
3194	int	NUP155 (int) PGLS	false	int	NUP155 (int) PGLS
3196	int	EFEMP2 (int) YWHAH	false	int	EFEMP2 (int) YWHAH
3197	int	EFEMP2 (int) LRRC17	false	int	EFEMP2 (int) LRRC17
3199	int	RASA2 (int) UNC5B	false	int	RASA2 (int) UNC5B
3201	int	HTR2B (int) SLC25A4	false	int	HTR2B (int) SLC25A4
3204	int	SCAMP1 (int) AP1S1	false	int	SCAMP1 (int) AP1S1
3206	int	TFEC (int) HOXA1	false	int	TFEC (int) HOXA1
3207	int	CHST7 (int) FLOT2	false	int	CHST7 (int) FLOT2
3209	int	CHST7 (int) NRXN3	false	int	CHST7 (int) NRXN3
3211	int	CHST7 (int) MAP4K4	false	int	CHST7 (int) MAP4K4
3213	int	KCNJ2 (int) SERPINB9	false	int	KCNJ2 (int) SERPINB9
3214	int	ITGA10 (int) BTG1	false	int	ITGA10 (int) BTG1
3215	int	ITGA10 (int) HTR2B	false	int	ITGA10 (int) HTR2B
3217	int	ITGA10 (int) IRS2	false	int	ITGA10 (int) IRS2
3219	int	CUBN (int) CHST11	false	int	CUBN (int) CHST11
3221	int	CUBN (int) CRNKL1	false	int	CUBN (int) CRNKL1
3224	int	SEMA3A (int) PTX3	false	int	SEMA3A (int) PTX3
3227	int	HYAL2 (int) PMP22	false	int	HYAL2 (int) PMP22
3230	int	GCKR (int) ITPR3	false	int	GCKR (int) ITPR3
3233	int	CLDN11 (int) MAB21L2	false	int	CLDN11 (int) MAB21L2
3235	int	GLE1 (int) PIGF	false	int	GLE1 (int) PIGF
3237	int	GLE1 (int) DDX18	false	int	GLE1 (int) DDX18
3239	int	GLE1 (int) FUSIP1	false	int	GLE1 (int) FUSIP1
3241	int	GLE1 (int) PPP2R5D	false	int	GLE1 (int) PPP2R5D
3243	int	GLE1 (int) CARHSP1	false	int	GLE1 (int) CARHSP1
3246	int	PPP3CC (int) ATXN10	false	int	PPP3CC (int) ATXN10
3249	int	ALDH1A2 (int) KCNK1	false	int	ALDH1A2 (int) KCNK1
3251	int	ALDH1A2 (int) RP11-35N6.1	false	int	ALDH1A2 (int) RP11-35N6.1
3254	int	SCN8A (int) C14orf143	false	int	SCN8A (int) C14orf143
3256	int	SMAD6 (int) DNAJC12	false	int	SMAD6 (int) DNAJC12
3258	int	ASS1 (int) IFITM1	false	int	ASS1 (int) IFITM1
3260	int	ASS1 (int) IRF6	false	int	ASS1 (int) IRF6
3262	int	ASS1 (int) FAM189A2	false	int	ASS1 (int) FAM189A2
3263	int	MED6 (int) SNX2	false	int	MED6 (int) SNX2
3264	int	MED6 (int) ATP6V1C1	false	int	MED6 (int) ATP6V1C1
3265	int	MED6 (int) SFRS3	false	int	MED6 (int) SFRS3
3266	int	MED6 (int) FH	false	int	MED6 (int) FH
3267	int	MED6 (int) FKBP5	false	int	MED6 (int) FKBP5
3269	int	MED6 (int) MED21	false	int	MED6 (int) MED21
3271	int	MED6 (int) MAPK14	false	int	MED6 (int) MAPK14
3273	int	MED6 (int) NUDT21	false	int	MED6 (int) NUDT21
3275	int	LETMD1 (int) PLCG2	false	int	LETMD1 (int) PLCG2
3278	int	CDH11 (int) TRIB1	false	int	CDH11 (int) TRIB1
3279	int	CDH11 (int) IL1R1	false	int	CDH11 (int) IL1R1
3281	int	CDH11 (int) PCSK5	false	int	CDH11 (int) PCSK5
3283	int	CDH11 (int) POSTN	false	int	CDH11 (int) POSTN
3285	int	CDH11 (int) HEG1	false	int	CDH11 (int) HEG1
3287	int	CDH11 (int) CFH	false	int	CDH11 (int) CFH
3289	int	ART4 (int) TXNRD2	false	int	ART4 (int) TXNRD2
3291	int	TGFBR2 (int) SCARB2	false	int	TGFBR2 (int) SCARB2
3293	int	TGFBR2 (int) KIAA0494	false	int	TGFBR2 (int) KIAA0494
3295	int	TGFBR2 (int) ATP6V1A	false	int	TGFBR2 (int) ATP6V1A
3296	int	TGFBR2 (int) ADAM10	false	int	TGFBR2 (int) ADAM10
3298	int	TGFBR2 (int) ATP11A	false	int	TGFBR2 (int) ATP11A
3300	int	TGFBR2 (int) C4orf18	false	int	TGFBR2 (int) C4orf18
3302	int	TGFBR2 (int) AHI1	false	int	TGFBR2 (int) AHI1
3305	int	SCN5A (int) DBNDD2	false	int	SCN5A (int) DBNDD2
3307	int	TNFSF4 (int) SDC1	false	int	TNFSF4 (int) SDC1
3308	int	TNFSF4 (int) CEBPD	false	int	TNFSF4 (int) CEBPD
3310	int	TNFSF4 (int) SECTM1	false	int	TNFSF4 (int) SECTM1
3312	int	DEGS1 (int) FZD6	false	int	DEGS1 (int) FZD6
3315	int	MEIS2 (int) HSD17B11	false	int	MEIS2 (int) HSD17B11
3317	int	MEIS2 (int) PELI2	false	int	MEIS2 (int) PELI2
3318	int	IL1RL1 (int) NRCAM	false	int	IL1RL1 (int) NRCAM
3320	int	IL1RL1 (int) VIPR1	false	int	IL1RL1 (int) VIPR1
3321	int	IL1RL1 (int) PLCL1	false	int	IL1RL1 (int) PLCL1
3322	int	IL1RL1 (int) BMPR1A	false	int	IL1RL1 (int) BMPR1A
3323	int	GADD45B (int) RAPGEF5	false	int	GADD45B (int) RAPGEF5
3325	int	GADD45B (int) ERCC2	false	int	GADD45B (int) ERCC2
3327	int	SULT1B1 (int) SERPINB8	false	int	SULT1B1 (int) SERPINB8
3329	int	SLC4A7 (int) MAP1B	false	int	SLC4A7 (int) MAP1B
3330	int	SERPINH1 (int) NEK3	false	int	SERPINH1 (int) NEK3
3332	int	SERPINH1 (int) LMAN2L	false	int	SERPINH1 (int) LMAN2L
3335	int	NCOR2 (int) ANP32A	false	int	NCOR2 (int) ANP32A
3336	int	NCOR2 (int) PKN1	false	int	NCOR2 (int) PKN1
3338	int	NCOR2 (int) LYL1	false	int	NCOR2 (int) LYL1
3340	int	NCOR2 (int) SMOX	false	int	NCOR2 (int) SMOX
3342	int	NCOR2 (int) SSBP2	false	int	NCOR2 (int) SSBP2
3344	int	NCOR2 (int) ZYX	false	int	NCOR2 (int) ZYX
3346	int	NCOR2 (int) PMEPA1	false	int	NCOR2 (int) PMEPA1
3348	int	NCOR2 (int) MAP1S	false	int	NCOR2 (int) MAP1S
3349	int	NCOR2 (int) PPARD	false	int	NCOR2 (int) PPARD
3350	int	METTL7A (int) SLC7A8	false	int	METTL7A (int) SLC7A8
3351	int	PSEN1 (int) TSPAN3	false	int	PSEN1 (int) TSPAN3
3353	int	PSEN1 (int) TNFRSF10B	false	int	PSEN1 (int) TNFRSF10B
3355	int	SORBS3 (int) MAZ	false	int	SORBS3 (int) MAZ
3357	int	PROS1 (int) ABCA8	false	int	PROS1 (int) ABCA8
3358	int	PROS1 (int) TGFBR3	false	int	PROS1 (int) TGFBR3
3359	int	PROS1 (int) CCL14	false	int	PROS1 (int) CCL14
3361	int	PROS1 (int) CITED2	false	int	PROS1 (int) CITED2
3363	int	PROS1 (int) PYCARD	false	int	PROS1 (int) PYCARD
3366	int	FDXR (int) PHLDA3	false	int	FDXR (int) PHLDA3
3369	int	PTK2 (int) FBXW11	false	int	PTK2 (int) FBXW11
3371	int	ID3 (int) ID1	false	int	ID3 (int) ID1
3373	int	ID3 (int) C22orf29	false	int	ID3 (int) C22orf29
3376	int	RBM39 (int) PCF11	false	int	RBM39 (int) PCF11
3378	int	RBM39 (int) CLK4	false	int	RBM39 (int) CLK4
3380	int	RBM39 (int) FUBP1	false	int	RBM39 (int) FUBP1
3382	int	RBM39 (int) ZNF83	false	int	RBM39 (int) ZNF83
3384	int	RBM39 (int) CASP8AP2	false	int	RBM39 (int) CASP8AP2
3386	int	STAG2 (int) EIF3C	false	int	STAG2 (int) EIF3C
3388	int	NFAT5 (int) ZC3H11A	false	int	NFAT5 (int) ZC3H11A
3390	int	NFAT5 (int) CDC42BPA	false	int	NFAT5 (int) CDC42BPA
3393	int	TTC3 (int) RBMS1	false	int	TTC3 (int) RBMS1
3395	int	TTC3 (int) RAC2	false	int	TTC3 (int) RAC2
3397	int	AURKA (int) PSRC1	false	int	AURKA (int) PSRC1
3398	int	AURKA (int) CDC2	false	int	AURKA (int) CDC2
3400	int	AURKA (int) KIF18B	false	int	AURKA (int) KIF18B
3403	int	TMX1 (int) PGRMC1	false	int	TMX1 (int) PGRMC1
3404	int	TMX1 (int) DDX3X	false	int	TMX1 (int) DDX3X
3405	int	TMX1 (int) ERLIN1	false	int	TMX1 (int) ERLIN1
3406	int	TMX1 (int) IPO8	false	int	TMX1 (int) IPO8
3409	int	LAS1L (int) NOC4L	false	int	LAS1L (int) NOC4L
3411	int	PTGIS (int) COL3A1	false	int	PTGIS (int) COL3A1
3414	int	DOHH (int) TAF15	false	int	DOHH (int) TAF15
3416	int	DDX21 (int) SLC16A7	false	int	DDX21 (int) SLC16A7
3418	int	DDX21 (int) TM7SF2	false	int	DDX21 (int) TM7SF2
3420	int	DDX21 (int) C2CD2	false	int	DDX21 (int) C2CD2
3423	int	RBM3 (int) DUSP6	false	int	RBM3 (int) DUSP6
3425	int	RBM3 (int) GSTZ1	false	int	RBM3 (int) GSTZ1
3428	int	ESM1 (int) DKK1	false	int	ESM1 (int) DKK1
3430	int	ESM1 (int) ARL4A	false	int	ESM1 (int) ARL4A
3432	int	ESM1 (int) SCARA3	false	int	ESM1 (int) SCARA3
3434	int	ESM1 (int) CALHM2	false	int	ESM1 (int) CALHM2
3436	int	RRAS2 (int) KIAA0649	false	int	RRAS2 (int) KIAA0649
3438	int	RRAS2 (int) BAG2	false	int	RRAS2 (int) BAG2
3441	int	XPO7 (int) VAMP2	false	int	XPO7 (int) VAMP2
3443	int	XPO7 (int) CSNK2A1	false	int	XPO7 (int) CSNK2A1
3444	int	XPO7 (int) STIP1	false	int	XPO7 (int) STIP1
3446	int	XPO7 (int) CES2	false	int	XPO7 (int) CES2
3448	int	XPO7 (int) SENP2	false	int	XPO7 (int) SENP2
3451	int	DNAJC3 (int) BMPR2	false	int	DNAJC3 (int) BMPR2
3453	int	DNAJC3 (int) GOLT1B	false	int	DNAJC3 (int) GOLT1B
3455	int	SRRM2 (int) AP3D1	false	int	SRRM2 (int) AP3D1
3456	int	SRRM2 (int) ZNF609	false	int	SRRM2 (int) ZNF609
3458	int	FLNB (int) PLEC1	false	int	FLNB (int) PLEC1
3460	int	FLNB (int) NES	false	int	FLNB (int) NES
3463	int	EIF4G1 (int) SEC63	false	int	EIF4G1 (int) SEC63
3464	int	EIF4G1 (int) SFRS8	false	int	EIF4G1 (int) SFRS8
3466	int	EIF4G1 (int) ILF3	false	int	EIF4G1 (int) ILF3
3468	int	EIF4G1 (int) FAF2	false	int	EIF4G1 (int) FAF2
3470	int	EIF4G1 (int) SECISBP2L	false	int	EIF4G1 (int) SECISBP2L
3472	int	EIF4G1 (int) AGFG1	false	int	EIF4G1 (int) AGFG1
3474	int	EIF4G1 (int) GAPVD1	false	int	EIF4G1 (int) GAPVD1
3476	int	HADHA (int) PRPF6	false	int	HADHA (int) PRPF6
3478	int	RNF10 (int) C5orf13	false	int	RNF10 (int) C5orf13
3480	int	CD164 (int) INTS1	false	int	CD164 (int) INTS1
3482	int	CD164 (int) TBL1X	false	int	CD164 (int) TBL1X
3484	int	CD164 (int) CASD1	false	int	CD164 (int) CASD1
3487	int	SEPT9 (int) CCDC69	false	int	SEPT9 (int) CCDC69
3489	int	SEPT9 (int) FNDC4	false	int	SEPT9 (int) FNDC4
3491	int	SEPT9 (int) SIGIRR	false	int	SEPT9 (int) SIGIRR
3493	int	SEPT9 (int) PTPLA	false	int	SEPT9 (int) PTPLA
3495	int	SERINC1 (int) CD46	false	int	SERINC1 (int) CD46
3497	int	SERINC1 (int) C3orf64	false	int	SERINC1 (int) C3orf64
3499	int	BSG (int) GLG1	false	int	BSG (int) GLG1
3502	int	APLP2 (int) RNASE1	false	int	APLP2 (int) RNASE1
3504	int	APLP2 (int) CNTNAP1	false	int	APLP2 (int) CNTNAP1
3506	int	CCND1 (int) JUN	false	int	CCND1 (int) JUN
3508	int	CCND1 (int) ARHGAP22	false	int	CCND1 (int) ARHGAP22
3510	int	CCND1 (int) CDKN2A	false	int	CCND1 (int) CDKN2A
3511	int	OXA1L (int) MAP1B	false	int	OXA1L (int) MAP1B
3512	int	ANAPC5 (int) BZW1	false	int	ANAPC5 (int) BZW1
3513	int	ANAPC5 (int) EPRS	false	int	ANAPC5 (int) EPRS
3514	int	ANAPC5 (int) ARHGDIA	false	int	ANAPC5 (int) ARHGDIA
3516	int	ANAPC5 (int) ARPP19	false	int	ANAPC5 (int) ARPP19
3519	int	C1S (int) TNFAIP2	false	int	C1S (int) TNFAIP2
3520	int	NCSTN (int) EXT2	false	int	NCSTN (int) EXT2
3522	int	NCSTN (int) NEU1	false	int	NCSTN (int) NEU1
3525	int	UBE2I (int) YKT6	false	int	UBE2I (int) YKT6
3526	int	LTA4H (int) MYST2	false	int	LTA4H (int) MYST2
3528	int	LTA4H (int) FOXO1	false	int	LTA4H (int) FOXO1
3530	int	PSMD11 (int) PSMD9	false	int	PSMD11 (int) PSMD9
3532	int	PSMD11 (int) H3F3B	false	int	PSMD11 (int) H3F3B
3534	int	PSMD11 (int) RBM8A	false	int	PSMD11 (int) RBM8A
3536	int	CLU (int) GPX3	false	int	CLU (int) GPX3
3537	int	HMGB2 (int) MMP14	false	int	HMGB2 (int) MMP14
3538	int	HMGB2 (int) USP1	false	int	HMGB2 (int) USP1
3539	int	HMGB2 (int) H1FX	false	int	HMGB2 (int) H1FX
3541	int	HMGB2 (int) PSIP1	false	int	HMGB2 (int) PSIP1
3543	int	HMGB2 (int) WEE1	false	int	HMGB2 (int) WEE1
3546	int	LUC7L3 (int) NKTR	false	int	LUC7L3 (int) NKTR
3548	int	LUC7L3 (int) CDS2	false	int	LUC7L3 (int) CDS2
3550	int	ATRX (int) LYST	false	int	ATRX (int) LYST
3552	int	ATRX (int) NBEA	false	int	ATRX (int) NBEA
3554	int	CSNK1A1 (int) CLIC4	false	int	CSNK1A1 (int) CLIC4
3556	int	CSNK1A1 (int) MBD3	false	int	CSNK1A1 (int) MBD3
3557	int	CSNK1A1 (int) PTK2	false	int	CSNK1A1 (int) PTK2
3559	int	CSNK1A1 (int) MAX	false	int	CSNK1A1 (int) MAX
3561	int	CSNK1A1 (int) DEDD	false	int	CSNK1A1 (int) DEDD
3563	int	CSNK1A1 (int) SOS2	false	int	CSNK1A1 (int) SOS2
3565	int	CSNK1A1 (int) ARPC4	false	int	CSNK1A1 (int) ARPC4
3567	int	CSNK1A1 (int) PXN	false	int	CSNK1A1 (int) PXN
3569	int	CSNK1A1 (int) C20orf30	false	int	CSNK1A1 (int) C20orf30
3572	int	GABARAPL1 (int) TNFAIP1	false	int	GABARAPL1 (int) TNFAIP1
3574	int	DUSP6 (int) PTGER4	false	int	DUSP6 (int) PTGER4
3577	int	TOP1 (int) THOC2	false	int	TOP1 (int) THOC2
3578	int	TOP1 (int) NEK1	false	int	TOP1 (int) NEK1
3580	int	ILF3 (int) PKP4	false	int	ILF3 (int) PKP4
3582	int	ILF3 (int) SART3	false	int	ILF3 (int) SART3
3584	int	ILF3 (int) DCAF16	false	int	ILF3 (int) DCAF16
3586	int	LGALS3 (int) MN1	false	int	LGALS3 (int) MN1
3588	int	LGALS3 (int) IL15	false	int	LGALS3 (int) IL15
3590	int	DUT (int) GAS6	false	int	DUT (int) GAS6
3591	int	DUT (int) NISCH	false	int	DUT (int) NISCH
3592	int	DUT (int) P4HA2	false	int	DUT (int) P4HA2
3594	int	DUT (int) COQ2	false	int	DUT (int) COQ2
3596	int	DUT (int) TMEM132A	false	int	DUT (int) TMEM132A
3598	int	DUT (int) PCYOX1L	false	int	DUT (int) PCYOX1L
3601	int	ERP44 (int) NUCB2	false	int	ERP44 (int) NUCB2
3602	int	ERP44 (int) MIA3	false	int	ERP44 (int) MIA3
3604	int	FADS1 (int) LSS	false	int	FADS1 (int) LSS
3607	int	AK2 (int) TPRKB	false	int	AK2 (int) TPRKB
3608	int	C1orf63 (int) NKTR	false	int	C1orf63 (int) NKTR
3609	int	C1orf63 (int) LUC7L3	false	int	C1orf63 (int) LUC7L3
3611	int	C1orf63 (int) RBBP6	false	int	C1orf63 (int) RBBP6
3613	int	C1orf63 (int) RSL1D1	false	int	C1orf63 (int) RSL1D1
3615	int	C1orf63 (int) ZNF692	false	int	C1orf63 (int) ZNF692
3617	int	TRIO (int) FRMD4A	false	int	TRIO (int) FRMD4A
3619	int	PINK1 (int) ALDH2	false	int	PINK1 (int) ALDH2
3621	int	PINK1 (int) TSPAN9	false	int	PINK1 (int) TSPAN9
3623	int	CADM1 (int) TUSC3	false	int	CADM1 (int) TUSC3
3625	int	CADM1 (int) ITGA4	false	int	CADM1 (int) ITGA4
3627	int	PSMB8 (int) PSMB9	false	int	PSMB8 (int) PSMB9
3629	int	PSMB8 (int) BTN3A3	false	int	PSMB8 (int) BTN3A3
3631	int	PSMB8 (int) ACSL5	false	int	PSMB8 (int) ACSL5
3633	int	RALGDS (int) KANK3	false	int	RALGDS (int) KANK3
3635	int	RALGDS (int) PCDHGA1	false	int	RALGDS (int) PCDHGA1
3636	int	RALGDS (int) C12orf4	false	int	RALGDS (int) C12orf4
3638	int	RALGDS (int) SH3TC1	false	int	RALGDS (int) SH3TC1
3640	int	RALGDS (int) TCF7L1	false	int	RALGDS (int) TCF7L1
3642	int	RALGDS (int) NOD1	false	int	RALGDS (int) NOD1
3644	int	RALGDS (int) HIP1R	false	int	RALGDS (int) HIP1R
3646	int	RALGDS (int) RIN3	false	int	RALGDS (int) RIN3
3649	int	WHSC1 (int) MYL5	false	int	WHSC1 (int) MYL5
3651	int	CDC5L (int) PDLIM5	false	int	CDC5L (int) PDLIM5
3653	int	CDC5L (int) ENSA	false	int	CDC5L (int) ENSA
3656	int	PAIP1 (int) TAP1	false	int	PAIP1 (int) TAP1
3657	int	COL18A1 (int) LDLR	false	int	COL18A1 (int) LDLR
3659	int	COL18A1 (int) GPC1	false	int	COL18A1 (int) GPC1
3661	int	COL18A1 (int) TCFL5	false	int	COL18A1 (int) TCFL5
3662	int	COL18A1 (int) KANK3	false	int	COL18A1 (int) KANK3
3664	int	GBA (int) CD58	false	int	GBA (int) CD58
3667	int	CTGF (int) CDC42EP4	false	int	CTGF (int) CDC42EP4
3668	int	TSPAN6 (int) SRPX2	false	int	TSPAN6 (int) SRPX2
3670	int	TSPAN6 (int) EDIL3	false	int	TSPAN6 (int) EDIL3
3672	int	CDKN1B (int) DIXDC1	false	int	CDKN1B (int) DIXDC1
3673	int	CDKN1B (int) ELK3	false	int	CDKN1B (int) ELK3
3675	int	NR2F2 (int) TMC6	false	int	NR2F2 (int) TMC6
3677	int	NR2F2 (int) CPS1	false	int	NR2F2 (int) CPS1
3678	int	NR2F2 (int) FBXW7	false	int	NR2F2 (int) FBXW7
3680	int	NR2F2 (int) ASAP3	false	int	NR2F2 (int) ASAP3
3682	int	SNAP23 (int) ASB13	false	int	SNAP23 (int) ASB13
3685	int	USP10 (int) PSME4	false	int	USP10 (int) PSME4
3687	int	USP10 (int) SPIN1	false	int	USP10 (int) SPIN1
3690	int	SC4MOL (int) DHCR24	false	int	SC4MOL (int) DHCR24
3691	int	SC4MOL (int) INSIG1	false	int	SC4MOL (int) INSIG1
3692	int	SC4MOL (int) HMGCR	false	int	SC4MOL (int) HMGCR
3694	int	SC4MOL (int) SQLE	false	int	SC4MOL (int) SQLE
3696	int	SC4MOL (int) FDFT1	false	int	SC4MOL (int) FDFT1
3698	int	SC4MOL (int) HMGCS1	false	int	SC4MOL (int) HMGCS1
3700	int	CYB561 (int) SLC22A4	false	int	CYB561 (int) SLC22A4
3702	int	MAN2B1 (int) MEGF8	false	int	MAN2B1 (int) MEGF8
3705	int	C10orf10 (int) UGDH	false	int	C10orf10 (int) UGDH
3707	int	C10orf10 (int) CPA3	false	int	C10orf10 (int) CPA3
3709	int	C10orf10 (int) LAP3	false	int	C10orf10 (int) LAP3
3711	int	IRS2 (int) PTS	false	int	IRS2 (int) PTS
3712	int	IRS2 (int) CDKN1C	false	int	IRS2 (int) CDKN1C
3714	int	MEF2C (int) STC2	false	int	MEF2C (int) STC2
3716	int	MEF2C (int) TNFRSF12A	false	int	MEF2C (int) TNFRSF12A
3718	int	MEF2C (int) LPAR6	false	int	MEF2C (int) LPAR6
3720	int	MEF2C (int) CADPS2	false	int	MEF2C (int) CADPS2
3722	int	SEC22B (int) ZNF688	false	int	SEC22B (int) ZNF688
3724	int	SQLE (int) DHCR7	false	int	SQLE (int) DHCR7
3726	int	SQLE (int) CYP51A1	false	int	SQLE (int) CYP51A1
3728	int	EMG1 (int) WDR77	false	int	EMG1 (int) WDR77
3730	int	EMG1 (int) GBP2	false	int	EMG1 (int) GBP2
3731	int	EMG1 (int) NUP88	false	int	EMG1 (int) NUP88
3732	int	EMG1 (int) PNO1	false	int	EMG1 (int) PNO1
3733	int	EMG1 (int) POP5	false	int	EMG1 (int) POP5
3734	int	EMG1 (int) XRCC4	false	int	EMG1 (int) XRCC4
3736	int	EMG1 (int) NOLC1	false	int	EMG1 (int) NOLC1
3737	int	EMG1 (int) TTC3	false	int	EMG1 (int) TTC3
3738	int	EMG1 (int) LAS1L	false	int	EMG1 (int) LAS1L
3739	int	EMG1 (int) AK2	false	int	EMG1 (int) AK2
3741	int	EMG1 (int) UCK2	false	int	EMG1 (int) UCK2
3743	int	EMG1 (int) RPS6KA2	false	int	EMG1 (int) RPS6KA2
3745	int	EMG1 (int) RPP40	false	int	EMG1 (int) RPP40
3747	int	EMG1 (int) MRPL42	false	int	EMG1 (int) MRPL42
3749	int	EMG1 (int) INF2	false	int	EMG1 (int) INF2
3751	int	EMG1 (int) BCCIP	false	int	EMG1 (int) BCCIP
3752	int	EMG1 (int) C16orf53	false	int	EMG1 (int) C16orf53
3753	int	EMG1 (int) EXOSC5	false	int	EMG1 (int) EXOSC5
3755	int	EMG1 (int) NDUFAF4	false	int	EMG1 (int) NDUFAF4
3757	int	EMG1 (int) C1orf54	false	int	EMG1 (int) C1orf54
3759	int	EMG1 (int) GEMIN6	false	int	EMG1 (int) GEMIN6
3761	int	EMG1 (int) UCHL5	false	int	EMG1 (int) UCHL5
3763	int	EMG1 (int) KLHL24	false	int	EMG1 (int) KLHL24
3766	int	SLC23A2 (int) SMTN	false	int	SLC23A2 (int) SMTN
3768	int	SLC23A2 (int) PPPDE2	false	int	SLC23A2 (int) PPPDE2
3770	int	STX3 (int) SLC30A1	false	int	STX3 (int) SLC30A1
3772	int	TSPAN4 (int) TINAGL1	false	int	TSPAN4 (int) TINAGL1
3775	int	SLC39A8 (int) TSPYL5	false	int	SLC39A8 (int) TSPYL5
3777	int	SLC39A8 (int) YPEL1	false	int	SLC39A8 (int) YPEL1
3779	int	PRKD2 (int) TENC1	false	int	PRKD2 (int) TENC1
3781	int	PWP2 (int) GAL3ST4	false	int	PWP2 (int) GAL3ST4
3782	int	PSIP1 (int) LBR	false	int	PSIP1 (int) LBR
3783	int	PSIP1 (int) IMPA2	false	int	PSIP1 (int) IMPA2
3785	int	PSIP1 (int) SAMHD1	false	int	PSIP1 (int) SAMHD1
3787	int	PSIP1 (int) RNF121	false	int	PSIP1 (int) RNF121
3789	int	UAP1 (int) TCN2	false	int	UAP1 (int) TCN2
3790	int	UAP1 (int) ABLIM3	false	int	UAP1 (int) ABLIM3
3792	int	UAP1 (int) PPP2R3A	false	int	UAP1 (int) PPP2R3A
3794	int	UAP1 (int) PHTF2	false	int	UAP1 (int) PHTF2
3796	int	UAP1 (int) ATP9A	false	int	UAP1 (int) ATP9A
3798	int	UAP1 (int) POP1	false	int	UAP1 (int) POP1
3800	int	UAP1 (int) NOL6	false	int	UAP1 (int) NOL6
3802	int	UAP1 (int) AMDHD2	false	int	UAP1 (int) AMDHD2
3803	int	UAP1 (int) C14orf139	false	int	UAP1 (int) C14orf139
3804	int	UAP1 (int) CNNM3	false	int	UAP1 (int) CNNM3
3806	int	UAP1 (int) TRIM34	false	int	UAP1 (int) TRIM34
3808	int	UAP1 (int) MARCH8	false	int	UAP1 (int) MARCH8
3810	int	UAP1 (int) FAM63A	false	int	UAP1 (int) FAM63A
3812	int	UAP1 (int) ORAI3	false	int	UAP1 (int) ORAI3
3813	int	SIN3B (int) RFK	false	int	SIN3B (int) RFK
3815	int	SIN3B (int) ABCC5	false	int	SIN3B (int) ABCC5
3816	int	ANXA3 (int) GPRC5B	false	int	ANXA3 (int) GPRC5B
3819	int	XPC (int) ALDH7A1	false	int	XPC (int) ALDH7A1
3821	int	XPC (int) HIST3H2A	false	int	XPC (int) HIST3H2A
3823	int	ME2 (int) NR2F2	false	int	ME2 (int) NR2F2
3825	int	ME2 (int) RPRD1A	false	int	ME2 (int) RPRD1A
3826	int	KIF2C (int) TMPO	false	int	KIF2C (int) TMPO
3827	int	KIF2C (int) KIF11	false	int	KIF2C (int) KIF11
3829	int	KIF2C (int) TROAP	false	int	KIF2C (int) TROAP
3831	int	KIF2C (int) CDC25C	false	int	KIF2C (int) CDC25C
3833	int	KIF2C (int) STIL	false	int	KIF2C (int) STIL
3835	int	SMPD1 (int) ITGA5	false	int	SMPD1 (int) ITGA5
3837	int	TANK (int) TBC1D8B	false	int	TANK (int) TBC1D8B
3839	int	FBXW11 (int) KPNA4	false	int	FBXW11 (int) KPNA4
3841	int	FBXW11 (int) SF3A2	false	int	FBXW11 (int) SF3A2
3843	int	AURKB (int) TK1	false	int	AURKB (int) TK1
3845	int	AURKB (int) MDC1	false	int	AURKB (int) MDC1
3847	int	AURKB (int) RAD54L	false	int	AURKB (int) RAD54L
3849	int	AURKB (int) NUDT1	false	int	AURKB (int) NUDT1
3850	int	AURKB (int) BARD1	false	int	AURKB (int) BARD1
3852	int	AURKB (int) SUV39H1	false	int	AURKB (int) SUV39H1
3854	int	POP7 (int) STRA13	false	int	POP7 (int) STRA13
3856	int	POP7 (int) PDCD4	false	int	POP7 (int) PDCD4
3858	int	POP7 (int) FLJ34077	false	int	POP7 (int) FLJ34077
3861	int	RBM4B (int) MTR	false	int	RBM4B (int) MTR
3863	int	RBM4B (int) PRDM2	false	int	RBM4B (int) PRDM2
3865	int	RBM4B (int) MCFD2	false	int	RBM4B (int) MCFD2
3867	int	RBM4B (int) ATP2A2	false	int	RBM4B (int) ATP2A2
3869	int	RBM4B (int) TMEM41B	false	int	RBM4B (int) TMEM41B
3871	int	RBM4B (int) DCP2	false	int	RBM4B (int) DCP2
3873	int	RBM4B (int) DCAF10	false	int	RBM4B (int) DCAF10
3875	int	RBM4B (int) C2orf42	false	int	RBM4B (int) C2orf42
3877	int	RBM4B (int) C19orf42	false	int	RBM4B (int) C19orf42
3879	int	NCBP1 (int) MIPEP	false	int	NCBP1 (int) MIPEP
3881	int	NCBP1 (int) GPER	false	int	NCBP1 (int) GPER
3883	int	NCBP1 (int) TUBGCP4	false	int	NCBP1 (int) TUBGCP4
3885	int	NCBP1 (int) LOC201229	false	int	NCBP1 (int) LOC201229
3887	int	NCBP1 (int) CHCHD7	false	int	NCBP1 (int) CHCHD7
3889	int	CD34 (int) CHST1	false	int	CD34 (int) CHST1
3891	int	RIPK2 (int) MSX1	false	int	RIPK2 (int) MSX1
3893	int	RIPK2 (int) ABCB1	false	int	RIPK2 (int) ABCB1
3896	int	RRS1 (int) DPH2	false	int	RRS1 (int) DPH2
3899	int	POFUT2 (int) SDC3	false	int	POFUT2 (int) SDC3
3901	int	POFUT2 (int) NADSYN1	false	int	POFUT2 (int) NADSYN1
3903	int	POFUT2 (int) RCN3	false	int	POFUT2 (int) RCN3
3905	int	POFUT2 (int) C1orf50	false	int	POFUT2 (int) C1orf50
3907	int	PNMA2 (int) CCND2	false	int	PNMA2 (int) CCND2
3908	int	PNMA2 (int) RHOBTB3	false	int	PNMA2 (int) RHOBTB3
3909	int	PNMA2 (int) ARMCX2	false	int	PNMA2 (int) ARMCX2
3911	int	PPP2R3A (int) LRIG1	false	int	PPP2R3A (int) LRIG1
3914	int	BUB1 (int) SMC1A	false	int	BUB1 (int) SMC1A
3915	int	BUB1 (int) DKK3	false	int	BUB1 (int) DKK3
3917	int	BUB1 (int) CEP76	false	int	BUB1 (int) CEP76
3919	int	PGF (int) EIF2B2	false	int	PGF (int) EIF2B2
3921	int	PGF (int) PCDH1	false	int	PGF (int) PCDH1
3923	int	PGF (int) SCHIP1	false	int	PGF (int) SCHIP1
3924	int	PGF (int) NID2	false	int	PGF (int) NID2
3925	int	PGF (int) CHST1	false	int	PGF (int) CHST1
3927	int	PGF (int) GATA6	false	int	PGF (int) GATA6
3928	int	PGF (int) DHRS7	false	int	PGF (int) DHRS7
3930	int	PGF (int) CXCR4	false	int	PGF (int) CXCR4
3932	int	PGF (int) C13orf15	false	int	PGF (int) C13orf15
3934	int	PGF (int) AGXT2L1	false	int	PGF (int) AGXT2L1
3935	int	KPNA4 (int) MTFR1	false	int	KPNA4 (int) MTFR1
3936	int	KPNA4 (int) AGPS	false	int	KPNA4 (int) AGPS
3938	int	KPNA4 (int) PPFIA1	false	int	KPNA4 (int) PPFIA1
3940	int	KPNA4 (int) KPNA6	false	int	KPNA4 (int) KPNA6
3942	int	KPNA4 (int) SELT	false	int	KPNA4 (int) SELT
3944	int	TMEM47 (int) TGFBI	false	int	TMEM47 (int) TGFBI
3946	int	TMEM47 (int) EVI2B	false	int	TMEM47 (int) EVI2B
3948	int	TMEM47 (int) PDLIM7	false	int	TMEM47 (int) PDLIM7
3950	int	TMEM47 (int) NAMPT	false	int	TMEM47 (int) NAMPT
3951	int	KIFC1 (int) RCC1	false	int	KIFC1 (int) RCC1
3953	int	CDKN3 (int) RAD51	false	int	CDKN3 (int) RAD51
3954	int	CDKN3 (int) DUT	false	int	CDKN3 (int) DUT
3955	int	EVI5 (int) MBNL2	false	int	EVI5 (int) MBNL2
3957	int	EVI5 (int) GCH1	false	int	EVI5 (int) GCH1
3959	int	CLEC2B (int) PIP4K2C	false	int	CLEC2B (int) PIP4K2C
3961	int	KIAA0922 (int) C17orf68	false	int	KIAA0922 (int) C17orf68
3964	int	RRM2 (int) IDS	false	int	RRM2 (int) IDS
3965	int	CXCL2 (int) NFKBIA	false	int	CXCL2 (int) NFKBIA
3966	int	CXCL2 (int) CEBPD	false	int	CXCL2 (int) CEBPD
3968	int	CXCL2 (int) LMCD1	false	int	CXCL2 (int) LMCD1
3970	int	PHTF2 (int) ASPH	false	int	PHTF2 (int) ASPH
3971	int	CORO2B (int) CLDN5	false	int	CORO2B (int) CLDN5
3973	int	CORO2B (int) HIP1	false	int	CORO2B (int) HIP1
3975	int	CORO2B (int) AIM1	false	int	CORO2B (int) AIM1
3977	int	PRKAA1 (int) ENO2	false	int	PRKAA1 (int) ENO2
3979	int	PRKAA1 (int) RBM38	false	int	PRKAA1 (int) RBM38
3982	int	HIST1H2BK (int) BTK	false	int	HIST1H2BK (int) BTK
3984	int	HIST1H2BK (int) PRUNE2	false	int	HIST1H2BK (int) PRUNE2
3986	int	IL33 (int) PTPRD	false	int	IL33 (int) PTPRD
3988	int	UCK2 (int) PHYH	false	int	UCK2 (int) PHYH
3989	int	UCK2 (int) SPG11	false	int	UCK2 (int) SPG11
3990	int	UCK2 (int) PNO1	false	int	UCK2 (int) PNO1
3992	int	UCK2 (int) MAGOHB	false	int	UCK2 (int) MAGOHB
3994	int	UCK2 (int) TMEM140	false	int	UCK2 (int) TMEM140
3995	int	CHST3 (int) DPYSL2	false	int	CHST3 (int) DPYSL2
3996	int	CHST3 (int) PRSS23	false	int	CHST3 (int) PRSS23
3999	int	CDC42EP2 (int) CHAC1	false	int	CDC42EP2 (int) CHAC1
4002	int	SPC25 (int) YPEL5	false	int	SPC25 (int) YPEL5
4004	int	LEPR (int) PALM2-AKAP2	false	int	LEPR (int) PALM2-AKAP2
4005	int	LEPR (int) TMOD1	false	int	LEPR (int) TMOD1
4006	int	LEPR (int) GCA	false	int	LEPR (int) GCA
4008	int	LEPR (int) SIPA1L3	false	int	LEPR (int) SIPA1L3
4010	int	LEPR (int) ZSCAN18	false	int	LEPR (int) ZSCAN18
4013	int	SLIT2 (int) SLC1A1	false	int	SLIT2 (int) SLC1A1
4015	int	ATR (int) PAAF1	false	int	ATR (int) PAAF1
4017	int	SLC7A11 (int) SLC3A2	false	int	SLC7A11 (int) SLC3A2
4019	int	GSK3B (int) SWAP70	false	int	GSK3B (int) SWAP70
4022	int	GABBR2 (int) TBC1D4	false	int	GABBR2 (int) TBC1D4
4023	int	GABBR2 (int) ZNF185	false	int	GABBR2 (int) ZNF185
4025	int	GABBR2 (int) PLIN2	false	int	GABBR2 (int) PLIN2
4027	int	GABBR2 (int) DCHS1	false	int	GABBR2 (int) DCHS1
4028	int	GATA6 (int) KAL1	false	int	GATA6 (int) KAL1
4030	int	GATA6 (int) MAP2K6	false	int	GATA6 (int) MAP2K6
4031	int	GATA6 (int) CDH11	false	int	GATA6 (int) CDH11
4032	int	GATA6 (int) ME2	false	int	GATA6 (int) ME2
4034	int	GATA6 (int) NEK7	false	int	GATA6 (int) NEK7
4036	int	GATA6 (int) LGR4	false	int	GATA6 (int) LGR4
4038	int	GATA6 (int) ADAMTS1	false	int	GATA6 (int) ADAMTS1
4041	int	ABHD14A (int) FAM57A	false	int	ABHD14A (int) FAM57A
4044	int	GOSR2 (int) MYCBP2	false	int	GOSR2 (int) MYCBP2
4046	int	PGM3 (int) GOLT1B	false	int	PGM3 (int) GOLT1B
4048	int	PGM3 (int) C1orf115	false	int	PGM3 (int) C1orf115
4050	int	LYL1 (int) RARA	false	int	LYL1 (int) RARA
4051	int	LYL1 (int) SLC23A2	false	int	LYL1 (int) SLC23A2
4053	int	LYL1 (int) NSDHL	false	int	LYL1 (int) NSDHL
4055	int	LYL1 (int) NT5DC2	false	int	LYL1 (int) NT5DC2
4057	int	LYL1 (int) LRRC16A	false	int	LYL1 (int) LRRC16A
4059	int	LYL1 (int) C11orf24	false	int	LYL1 (int) C11orf24
4062	int	TPX2 (int) ABCA3	false	int	TPX2 (int) ABCA3
4064	int	TPX2 (int) PXDN	false	int	TPX2 (int) PXDN
4066	int	TPX2 (int) LAMB2	false	int	TPX2 (int) LAMB2
4068	int	TPX2 (int) C13orf34	false	int	TPX2 (int) C13orf34
4070	int	TPX2 (int) NCAPG2	false	int	TPX2 (int) NCAPG2
4072	int	TPX2 (int) ATP5O	false	int	TPX2 (int) ATP5O
4074	int	TAF5 (int) ---	false	int	TAF5 (int) ---
4076	int	TAF5 (int) PRDM10	false	int	TAF5 (int) PRDM10
4078	int	RND1 (int) TRIB2	false	int	RND1 (int) TRIB2
4080	int	RND1 (int) RBL2	false	int	RND1 (int) RBL2
4082	int	FYN (int) PKIG	false	int	FYN (int) PKIG
4083	int	FYN (int) MAP4K4	false	int	FYN (int) MAP4K4
4085	int	FYN (int) SFXN3	false	int	FYN (int) SFXN3
4088	int	RPL39L (int) ACAT2	false	int	RPL39L (int) ACAT2
4090	int	IL1A (int) IL1B	false	int	IL1A (int) IL1B
4092	int	IL1A (int) NTHL1	false	int	IL1A (int) NTHL1
4094	int	IL1A (int) SYNM	false	int	IL1A (int) SYNM
4096	int	PMP22 (int) LOX	false	int	PMP22 (int) LOX
4098	int	PMP22 (int) RAGE	false	int	PMP22 (int) RAGE
4099	int	PLA2G4A (int) PTGS2	false	int	PLA2G4A (int) PTGS2
4101	int	FUSIP1 (int) PBX2	false	int	FUSIP1 (int) PBX2
4103	int	FKBP1A (int) TM6SF1	false	int	FKBP1A (int) TM6SF1
4105	int	NOL12 (int) ASAP2	false	int	NOL12 (int) ASAP2
4107	int	NOL12 (int) AHNAK2	false	int	NOL12 (int) AHNAK2
4109	int	MAP3K7IP2 (int) RASA1	false	int	MAP3K7IP2 (int) RASA1
4111	int	MAP3K7IP2 (int) TOR1AIP1	false	int	MAP3K7IP2 (int) TOR1AIP1
4113	int	WTAP (int) ZC3H7B	false	int	WTAP (int) ZC3H7B
4114	int	WTAP (int) PRKAA1	false	int	WTAP (int) PRKAA1
4116	int	WTAP (int) FBXO17	false	int	WTAP (int) FBXO17
4117	int	CLK4 (int) C1orf9	false	int	CLK4 (int) C1orf9
4120	int	GPR125 (int) DYNC1I1	false	int	GPR125 (int) DYNC1I1
4121	int	INHBA (int) LOXL2	false	int	INHBA (int) LOXL2
4123	int	INHBA (int) FNDC3B	false	int	INHBA (int) FNDC3B
4125	int	INHBA (int) ASRGL1	false	int	INHBA (int) ASRGL1
4127	int	INHBA (int) RAB38	false	int	INHBA (int) RAB38
4129	int	INHBA (int) MOCOS	false	int	INHBA (int) MOCOS
4131	int	INHBA (int) FZD5	false	int	INHBA (int) FZD5
4133	int	SAT1 (int) DDR1	false	int	SAT1 (int) DDR1
4135	int	SAT1 (int) STAT1	false	int	SAT1 (int) STAT1
4137	int	SAT1 (int) IER3	false	int	SAT1 (int) IER3
4139	int	SAT1 (int) B4GALT1	false	int	SAT1 (int) B4GALT1
4140	int	SAT1 (int) ARMCX2	false	int	SAT1 (int) ARMCX2
4141	int	SAT1 (int) GABBR2	false	int	SAT1 (int) GABBR2
4143	int	SAT1 (int) VEGFA	false	int	SAT1 (int) VEGFA
4145	int	RASA1 (int) ZBTB1	false	int	RASA1 (int) ZBTB1
4148	int	ATG5 (int) FLNC	false	int	ATG5 (int) FLNC
4150	int	ATG5 (int) MFN1	false	int	ATG5 (int) MFN1
4152	int	FLI1 (int) PRKCH	false	int	FLI1 (int) PRKCH
4154	int	FLI1 (int) HHEX	false	int	FLI1 (int) HHEX
4156	int	FLI1 (int) ZFYVE21	false	int	FLI1 (int) ZFYVE21
4158	int	DHRS7 (int) ITGBL1	false	int	DHRS7 (int) ITGBL1
4160	int	DIMT1L (int) ZNF862	false	int	DIMT1L (int) ZNF862
4161	int	POSTN (int) MYH10	false	int	POSTN (int) MYH10
4163	int	SSBP2 (int) GMPR	false	int	SSBP2 (int) GMPR
4165	int	SSBP2 (int) PCTP	false	int	SSBP2 (int) PCTP
4167	int	SSBP2 (int) C1GALT1	false	int	SSBP2 (int) C1GALT1
4170	int	PON2 (int) SMARCD2	false	int	PON2 (int) SMARCD2
4172	int	PON2 (int) HIPK2	false	int	PON2 (int) HIPK2
4175	int	PLAUR (int) CEP57	false	int	PLAUR (int) CEP57
4177	int	GTF2I (int) DGKA	false	int	GTF2I (int) DGKA
4179	int	RNF6 (int) KDM6A	false	int	RNF6 (int) KDM6A
4181	int	RNF6 (int) RAB1A	false	int	RNF6 (int) RAB1A
4183	int	RNF6 (int) LOC653390	false	int	RNF6 (int) LOC653390
4185	int	WDR1 (int) ATP6V1C1	false	int	WDR1 (int) ATP6V1C1
4187	int	WDR1 (int) SLK	false	int	WDR1 (int) SLK
4189	int	WDR1 (int) MPDU1	false	int	WDR1 (int) MPDU1
4191	int	WDR1 (int) RBM9	false	int	WDR1 (int) RBM9
4193	int	WDR1 (int) TMEM185B	false	int	WDR1 (int) TMEM185B
4195	int	WDR1 (int) ANKFY1	false	int	WDR1 (int) ANKFY1
4197	int	WDR1 (int) FAM108B1	false	int	WDR1 (int) FAM108B1
4199	int	WDR1 (int) LDB1	false	int	WDR1 (int) LDB1
4200	int	FDFT1 (int) FADS2	false	int	FDFT1 (int) FADS2
4202	int	FDFT1 (int) NRIP1	false	int	FDFT1 (int) NRIP1
4205	int	MCM7 (int) HIRIP3	false	int	MCM7 (int) HIRIP3
4206	int	MCM7 (int) MCM4	false	int	MCM7 (int) MCM4
4208	int	MCM7 (int) MCM5	false	int	MCM7 (int) MCM5
4210	int	MCM7 (int) MNS1	false	int	MCM7 (int) MNS1
4212	int	TPM1 (int) IGFBP7	false	int	TPM1 (int) IGFBP7
4213	int	TPM1 (int) NNMT	false	int	TPM1 (int) NNMT
4214	int	TPM1 (int) SLC16A3	false	int	TPM1 (int) SLC16A3
4216	int	TPM1 (int) DMD	false	int	TPM1 (int) DMD
4218	int	TPM1 (int) SNAPC1	false	int	TPM1 (int) SNAPC1
4220	int	TPM1 (int) SLC35D1	false	int	TPM1 (int) SLC35D1
4222	int	TPM1 (int) CALD1	false	int	TPM1 (int) CALD1
4224	int	TPM1 (int) SGPL1	false	int	TPM1 (int) SGPL1
4226	int	TPM1 (int) TMEM45A	false	int	TPM1 (int) TMEM45A
4228	int	ZNF271 (int) PPP3CC	false	int	ZNF271 (int) PPP3CC
4230	int	MGLL (int) PAMR1	false	int	MGLL (int) PAMR1
4232	int	PDIA4 (int) NUCB2	false	int	PDIA4 (int) NUCB2
4235	int	MLLT11 (int) RAI14	false	int	MLLT11 (int) RAI14
4237	int	MLLT11 (int) DPYD	false	int	MLLT11 (int) DPYD
4238	int	MLLT11 (int) NR3C2	false	int	MLLT11 (int) NR3C2
4240	int	MLLT11 (int) FBXL7	false	int	MLLT11 (int) FBXL7
[truncated: 1,369 more rows]
