# Supplementary material for: Oxidized phospholipids regulate amino acid metabolism through MTHFD2 to facilitate nucleotide release in endothelial cells
Source: Nat Commun. 2018 Jun 12;9:2292. doi: 10.1038/s41467-018-04602-0 (PMC5997752; doi:10.1038/s41467-018-04602-0)
Supplement: Supplementary file 4 — Supplementary Data 2 [file 41467_2018_4602_MOESM4_ESM.xlsx]

## Sheet: Edge_table_oxPAPC_Bayesian_netw
SUID	interaction	name	selected	shared interaction	shared name
13226	int	UBA7 (int) UBE2L6	false	int	UBA7 (int) UBE2L6
13228	int	UBA7 (int) SNX19	false	int	UBA7 (int) SNX19
13230	int	UBA7 (int) HDAC5	false	int	UBA7 (int) HDAC5
13232	int	UBA7 (int) GALT	false	int	UBA7 (int) GALT
13234	int	UBA7 (int) RCBTB2	false	int	UBA7 (int) RCBTB2
13236	int	UBA7 (int) BTN3A3	false	int	UBA7 (int) BTN3A3
13238	int	UBA7 (int) MPDZ	false	int	UBA7 (int) MPDZ
13240	int	UBA7 (int) SP110	false	int	UBA7 (int) SP110
13242	int	UBA7 (int) KLC1	false	int	UBA7 (int) KLC1
13244	int	UBA7 (int) SLC2A10	false	int	UBA7 (int) SLC2A10
13246	int	UBA7 (int) SPSB3	false	int	UBA7 (int) SPSB3
13249	int	GAS6 (int) COL5A1	false	int	GAS6 (int) COL5A1
13252	int	PRKAR1A (int) ADSS	false	int	PRKAR1A (int) ADSS
13255	int	RAD21 (int) ARMCX3	false	int	RAD21 (int) ARMCX3
13258	int	MLEC (int) TBC1D8	false	int	MLEC (int) TBC1D8
13260	int	MLEC (int) EPS15	false	int	MLEC (int) EPS15
13263	int	YWHAZ (int) BZW1	false	int	YWHAZ (int) BZW1
13265	int	YWHAZ (int) DDX3X	false	int	YWHAZ (int) DDX3X
13267	int	YWHAZ (int) API5	false	int	YWHAZ (int) API5
13269	int	YWHAZ (int) LANCL1	false	int	YWHAZ (int) LANCL1
13271	int	YWHAZ (int) KPNA1	false	int	YWHAZ (int) KPNA1
13273	int	YWHAZ (int) ERLIN1	false	int	YWHAZ (int) ERLIN1
13275	int	YWHAZ (int) RAB35	false	int	YWHAZ (int) RAB35
13277	int	YWHAZ (int) SORBS3	false	int	YWHAZ (int) SORBS3
13279	int	YWHAZ (int) FERMT2	false	int	YWHAZ (int) FERMT2
13281	int	YWHAZ (int) WTAP	false	int	YWHAZ (int) WTAP
13283	int	YWHAZ (int) GTF2I	false	int	YWHAZ (int) GTF2I
13285	int	YWHAZ (int) PAFAH1B1	false	int	YWHAZ (int) PAFAH1B1
13287	int	YWHAZ (int) CDV3	false	int	YWHAZ (int) CDV3
13289	int	YWHAZ (int) ARFGAP1	false	int	YWHAZ (int) ARFGAP1
13291	int	YWHAZ (int) DCTN4	false	int	YWHAZ (int) DCTN4
13293	int	YWHAZ (int) TNPO2	false	int	YWHAZ (int) TNPO2
13296	int	GLUL (int) ZYX	false	int	GLUL (int) ZYX
13298	int	GLUL (int) SLC38A10	false	int	GLUL (int) SLC38A10
13301	int	CTSA (int) CTSD	false	int	CTSA (int) CTSD
13303	int	CTSA (int) GM2A	false	int	CTSA (int) GM2A
13305	int	CTSA (int) SGSH	false	int	CTSA (int) SGSH
13308	int	DNAJB1 (int) HSPA1A	false	int	DNAJB1 (int) HSPA1A
13310	int	DNAJB1 (int) MTR	false	int	DNAJB1 (int) MTR
13312	int	DNAJB1 (int) TMEM41B	false	int	DNAJB1 (int) TMEM41B
13314	int	DNAJB1 (int) BAG3	false	int	DNAJB1 (int) BAG3
13316	int	DNAJB1 (int) C2orf42	false	int	DNAJB1 (int) C2orf42
13318	int	DNAJB1 (int) LRRC49	false	int	DNAJB1 (int) LRRC49
13320	int	DNAJB1 (int) PKNOX1	false	int	DNAJB1 (int) PKNOX1
13322	int	DNAJB1 (int) MECOM	false	int	DNAJB1 (int) MECOM
13325	int	XBP1 (int) HSPA13	false	int	XBP1 (int) HSPA13
13328	int	GRN (int) NUCB1	false	int	GRN (int) NUCB1
13329	int	GRN (int) CTSA	false	int	GRN (int) CTSA
13331	int	GRN (int) TPP1	false	int	GRN (int) TPP1
13333	int	GRN (int) PSAP	false	int	GRN (int) PSAP
13335	int	GRN (int) PDIA5	false	int	GRN (int) PDIA5
13337	int	GRN (int) TCEA2	false	int	GRN (int) TCEA2
13339	int	GRN (int) TRAPPC6A	false	int	GRN (int) TRAPPC6A
13341	int	GRN (int) ABLIM3	false	int	GRN (int) ABLIM3
13343	int	GRN (int) MAN2B1	false	int	GRN (int) MAN2B1
13345	int	GRN (int) GNS	false	int	GRN (int) GNS
13347	int	GRN (int) CD59	false	int	GRN (int) CD59
13349	int	GRN (int) MAN2B2	false	int	GRN (int) MAN2B2
13351	int	GRN (int) HGSNAT	false	int	GRN (int) HGSNAT
13353	int	GRN (int) NPDC1	false	int	GRN (int) NPDC1
13355	int	GRN (int) ISOC1	false	int	GRN (int) ISOC1
13357	int	GRN (int) EDEM2	false	int	GRN (int) EDEM2
13359	int	GRN (int) BBS1	false	int	GRN (int) BBS1
13361	int	GRN (int) FCGRT	false	int	GRN (int) FCGRT
13363	int	GRN (int) C1orf54	false	int	GRN (int) C1orf54
13365	int	GRN (int) TSPAN9	false	int	GRN (int) TSPAN9
13367	int	GRN (int) GDPD5	false	int	GRN (int) GDPD5
13370	int	GSN (int) ABLIM1	false	int	GSN (int) ABLIM1
13372	int	GSN (int) PLCG2	false	int	GSN (int) PLCG2
13374	int	GSN (int) ITGA10	false	int	GSN (int) ITGA10
13376	int	GSN (int) TNFRSF14	false	int	GSN (int) TNFRSF14
13378	int	GSN (int) ZCCHC24	false	int	GSN (int) ZCCHC24
13381	int	PRKCSH (int) HSPG2	false	int	PRKCSH (int) HSPG2
13384	int	CAPRIN1 (int) ATP6V1C1	false	int	CAPRIN1 (int) ATP6V1C1
13386	int	CAPRIN1 (int) MED20	false	int	CAPRIN1 (int) MED20
13388	int	CAPRIN1 (int) WDR1	false	int	CAPRIN1 (int) WDR1
13391	int	PTP4A1 (int) ARF6	false	int	PTP4A1 (int) ARF6
13393	int	PTP4A1 (int) RBMS3	false	int	PTP4A1 (int) RBMS3
13395	int	PTP4A1 (int) CYP51A1	false	int	PTP4A1 (int) CYP51A1
13397	int	PTP4A1 (int) LIN7C	false	int	PTP4A1 (int) LIN7C
13398	int	TPP1 (int) UBA7	false	int	TPP1 (int) UBA7
13400	int	TPP1 (int) HLA-E	false	int	TPP1 (int) HLA-E
13402	int	TPP1 (int) LAMP2	false	int	TPP1 (int) LAMP2
13404	int	TPP1 (int) COQ2	false	int	TPP1 (int) COQ2
13406	int	TPP1 (int) HS1BP3	false	int	TPP1 (int) HS1BP3
13408	int	TPP1 (int) KLHL7	false	int	TPP1 (int) KLHL7
13410	int	TPP1 (int) MRTO4	false	int	TPP1 (int) MRTO4
13413	int	CALU (int) MBD3	false	int	CALU (int) MBD3
13415	int	CALU (int) TNFRSF10D	false	int	CALU (int) TNFRSF10D
13417	int	CALU (int) YIPF5	false	int	CALU (int) YIPF5
13419	int	CALU (int) DNAJC10	false	int	CALU (int) DNAJC10
13422	int	DPYSL2 (int) SH3BP5	false	int	DPYSL2 (int) SH3BP5
13424	int	DPYSL2 (int) MEST	false	int	DPYSL2 (int) MEST
13426	int	DPYSL2 (int) WIPF1	false	int	DPYSL2 (int) WIPF1
13428	int	DPYSL2 (int) INPP5D	false	int	DPYSL2 (int) INPP5D
13430	int	DPYSL2 (int) GRK5	false	int	DPYSL2 (int) GRK5
13432	int	DPYSL2 (int) PHKA1	false	int	DPYSL2 (int) PHKA1
13434	int	DPYSL2 (int) TNFSF12	false	int	DPYSL2 (int) TNFSF12
13436	int	DPYSL2 (int) SLC39A8	false	int	DPYSL2 (int) SLC39A8
13438	int	DPYSL2 (int) PNMA2	false	int	DPYSL2 (int) PNMA2
13440	int	DPYSL2 (int) MYO5C	false	int	DPYSL2 (int) MYO5C
13442	int	DPYSL2 (int) FKBP11	false	int	DPYSL2 (int) FKBP11
13444	int	CTSD (int) CLSTN1	false	int	CTSD (int) CLSTN1
13447	int	MAT2A (int) INTS1	false	int	MAT2A (int) INTS1
13450	int	IQGAP1 (int) FBXO34	false	int	IQGAP1 (int) FBXO34
13453	int	MCL1 (int) B4GALT6	false	int	MCL1 (int) B4GALT6
13455	int	HSPA1A (int) FKBP4	false	int	HSPA1A (int) FKBP4
13457	int	HSPA1A (int) NCRNA00094	false	int	HSPA1A (int) NCRNA00094
13459	int	HSPA1A (int) TSC22D2	false	int	HSPA1A (int) TSC22D2
13461	int	HSPA1A (int) HSPH1	false	int	HSPA1A (int) HSPH1
13463	int	HSPA1A (int) JMJD6	false	int	HSPA1A (int) JMJD6
13465	int	HSPA1A (int) SLC5A3	false	int	HSPA1A (int) SLC5A3
13467	int	HSPA1A (int) DIDO1	false	int	HSPA1A (int) DIDO1
13469	int	HSPA1A (int) BANP	false	int	HSPA1A (int) BANP
13472	int	HSPD1 (int) PPID	false	int	HSPD1 (int) PPID
13474	int	HSPD1 (int) NAGLU	false	int	HSPD1 (int) NAGLU
13476	int	HSPD1 (int) HSPA4L	false	int	HSPD1 (int) HSPA4L
13478	int	ZYX (int) PDLIM7	false	int	ZYX (int) PDLIM7
13480	int	ZYX (int) PMEPA1	false	int	ZYX (int) PMEPA1
13483	int	CIRBP (int) FASTKD1	false	int	CIRBP (int) FASTKD1
13486	int	HYOU1 (int) DNAJC3	false	int	HYOU1 (int) DNAJC3
13488	int	HYOU1 (int) MOGS	false	int	HYOU1 (int) MOGS
13490	int	HYOU1 (int) CRELD2	false	int	HYOU1 (int) CRELD2
13492	int	HYOU1 (int) SDF2L1	false	int	HYOU1 (int) SDF2L1
13495	int	MAP4 (int) ZEB1	false	int	MAP4 (int) ZEB1
13498	int	RAB11A (int) SLK	false	int	RAB11A (int) SLK
13500	int	RAB11A (int) C3orf64	false	int	RAB11A (int) C3orf64
13502	int	PSAP (int) ATP6AP1	false	int	PSAP (int) ATP6AP1
13505	int	EPAS1 (int) SORBS2	false	int	EPAS1 (int) SORBS2
13507	int	EPAS1 (int) FLRT2	false	int	EPAS1 (int) FLRT2
13509	int	EPAS1 (int) SORT1	false	int	EPAS1 (int) SORT1
13512	int	DNAJA1 (int) IER5	false	int	DNAJA1 (int) IER5
13514	int	DNAJA1 (int) TMEM39A	false	int	DNAJA1 (int) TMEM39A
13517	int	STAT1 (int) NP	false	int	STAT1 (int) NP
13519	int	STAT1 (int) SMAD6	false	int	STAT1 (int) SMAD6
13521	int	STAT1 (int) TMEM158	false	int	STAT1 (int) TMEM158
13524	int	SSR1 (int) KIAA0090	false	int	SSR1 (int) KIAA0090
13526	int	SSR1 (int) IMPAD1	false	int	SSR1 (int) IMPAD1
13528	int	SSR1 (int) SPCS3	false	int	SSR1 (int) SPCS3
13531	int	TRA2B (int) GALNS	false	int	TRA2B (int) GALNS
13534	int	MGEA5 (int) ZNF217	false	int	MGEA5 (int) ZNF217
13536	int	MGEA5 (int) RGS10	false	int	MGEA5 (int) RGS10
13538	int	MGEA5 (int) KDM3A	false	int	MGEA5 (int) KDM3A
13540	int	MGEA5 (int) EXOSC4	false	int	MGEA5 (int) EXOSC4
13542	int	HLA-E (int) MGAT4B	false	int	HLA-E (int) MGAT4B
13545	int	BTG1 (int) NID1	false	int	BTG1 (int) NID1
13548	int	SLC3A2 (int) OSGIN1	false	int	SLC3A2 (int) OSGIN1
13551	int	DEK (int) THBS3	false	int	DEK (int) THBS3
13553	int	DEK (int) TST	false	int	DEK (int) TST
13556	int	CCND2 (int) EPB41L3	false	int	CCND2 (int) EPB41L3
13559	int	ANXA6 (int) ADRB2	false	int	ANXA6 (int) ADRB2
13561	int	CKAP4 (int) MLEC	false	int	CKAP4 (int) MLEC
13563	int	CKAP4 (int) GSK3B	false	int	CKAP4 (int) GSK3B
13565	int	CKAP4 (int) PARD3	false	int	CKAP4 (int) PARD3
13568	int	AARS (int) ARHGEF2	false	int	AARS (int) ARHGEF2
13570	int	AARS (int) CARS	false	int	AARS (int) CARS
13572	int	AARS (int) PLSCR4	false	int	AARS (int) PLSCR4
13575	int	PAICS (int) NUP98	false	int	PAICS (int) NUP98
13577	int	PAICS (int) UCHL5	false	int	PAICS (int) UCHL5
13580	int	JUP (int) WDR45	false	int	JUP (int) WDR45
13583	int	EIF5B (int) MDN1	false	int	EIF5B (int) MDN1
13585	int	EIF5B (int) PFAS	false	int	EIF5B (int) PFAS
13587	int	EIF5B (int) FTH1	false	int	EIF5B (int) FTH1
13590	int	CD99 (int) SERINC3	false	int	CD99 (int) SERINC3
13593	int	ADD3 (int) ECM1	false	int	ADD3 (int) ECM1
13595	int	ADD3 (int) SEMA3F	false	int	ADD3 (int) SEMA3F
13598	int	DUSP1 (int) NAGA	false	int	DUSP1 (int) NAGA
13600	int	DUSP1 (int) EXTL2	false	int	DUSP1 (int) EXTL2
13603	int	PLD3 (int) FAM38A	false	int	PLD3 (int) FAM38A
13606	int	MYL9 (int) TPM2	false	int	MYL9 (int) TPM2
13608	int	MYL9 (int) TAGLN	false	int	MYL9 (int) TAGLN
13611	int	MMP2 (int) HTRA1	false	int	MMP2 (int) HTRA1
13613	int	MMP2 (int) CBR1	false	int	MMP2 (int) CBR1
13615	int	MMP2 (int) GALNT10	false	int	MMP2 (int) GALNT10
13617	int	MMP2 (int) SPSB1	false	int	MMP2 (int) SPSB1
13619	int	MMP2 (int) CCDC68	false	int	MMP2 (int) CCDC68
13621	int	MMP2 (int) GPR124	false	int	MMP2 (int) GPR124
13624	int	SMARCC1 (int) EIF4G1	false	int	SMARCC1 (int) EIF4G1
13626	int	SMARCC1 (int) TOP1	false	int	SMARCC1 (int) TOP1
13628	int	SMARCC1 (int) SECISBP2L	false	int	SMARCC1 (int) SECISBP2L
13630	int	SMARCC1 (int) MYO10	false	int	SMARCC1 (int) MYO10
13633	int	TM9SF2 (int) ZMYM6	false	int	TM9SF2 (int) ZMYM6
13636	int	CPE (int) DIP2C	false	int	CPE (int) DIP2C
13639	int	MBNL1 (int) CES2	false	int	MBNL1 (int) CES2
13641	int	MBNL1 (int) FHOD1	false	int	MBNL1 (int) FHOD1
13644	int	IGFBP7 (int) PTPRF	false	int	IGFBP7 (int) PTPRF
13647	int	CHD4 (int) KTN1	false	int	CHD4 (int) KTN1
13649	int	CHD4 (int) BAT2D1	false	int	CHD4 (int) BAT2D1
13651	int	HTRA1 (int) ADAM19	false	int	HTRA1 (int) ADAM19
13653	int	HTRA1 (int) C22orf9	false	int	HTRA1 (int) C22orf9
13656	int	LRPAP1 (int) GLG1	false	int	LRPAP1 (int) GLG1
13658	int	SLC7A5 (int) AARS	false	int	SLC7A5 (int) AARS
13660	int	SLC7A5 (int) PCK2	false	int	SLC7A5 (int) PCK2
13662	int	SLC7A5 (int) TRIB3	false	int	SLC7A5 (int) TRIB3
13665	int	PCNA (int) MSH6	false	int	PCNA (int) MSH6
13667	int	PCNA (int) CDKN1B	false	int	PCNA (int) CDKN1B
13670	int	RRBP1 (int) TRPV2	false	int	RRBP1 (int) TRPV2
13673	int	TNFAIP1 (int) RELB	false	int	TNFAIP1 (int) RELB
13675	int	TNFAIP1 (int) MTMR4	false	int	TNFAIP1 (int) MTMR4
13677	int	DDX3X (int) G3BP2	false	int	DDX3X (int) G3BP2
13679	int	DDX3X (int) HP1BP3	false	int	DDX3X (int) HP1BP3
13682	int	BTG2 (int) SOX4	false	int	BTG2 (int) SOX4
13684	int	BTG2 (int) TNFSF10	false	int	BTG2 (int) TNFSF10
13686	int	BTG2 (int) LRRC32	false	int	BTG2 (int) LRRC32
13688	int	BTG2 (int) PPM1D	false	int	BTG2 (int) PPM1D
13690	int	BTG2 (int) SERPINB8	false	int	BTG2 (int) SERPINB8
13692	int	BTG2 (int) SLC16A7	false	int	BTG2 (int) SLC16A7
13694	int	BTG2 (int) TNFRSF10C	false	int	BTG2 (int) TNFRSF10C
13696	int	BTG2 (int) A2M	false	int	BTG2 (int) A2M
13698	int	BTG2 (int) SESN1	false	int	BTG2 (int) SESN1
13700	int	BTG2 (int) FAM124B	false	int	BTG2 (int) FAM124B
13702	int	BTG2 (int) JAG2	false	int	BTG2 (int) JAG2
13704	int	SYPL1 (int) GLUL	false	int	SYPL1 (int) GLUL
13706	int	SYPL1 (int) TGFBR2	false	int	SYPL1 (int) TGFBR2
13708	int	SYPL1 (int) PSEN1	false	int	SYPL1 (int) PSEN1
13710	int	SYPL1 (int) CD164	false	int	SYPL1 (int) CD164
13712	int	SYPL1 (int) AP3D1	false	int	SYPL1 (int) AP3D1
13714	int	SYPL1 (int) B3GALNT1	false	int	SYPL1 (int) B3GALNT1
13716	int	SYPL1 (int) DAZAP2	false	int	SYPL1 (int) DAZAP2
13718	int	SYPL1 (int) ARFRP1	false	int	SYPL1 (int) ARFRP1
13720	int	SYPL1 (int) NF2	false	int	SYPL1 (int) NF2
13722	int	SYPL1 (int) EIF4B	false	int	SYPL1 (int) EIF4B
13724	int	SYPL1 (int) SGPP1	false	int	SYPL1 (int) SGPP1
13727	int	AKR1B1 (int) DCN	false	int	AKR1B1 (int) DCN
13728	int	AKR1B1 (int) TRPV2	false	int	AKR1B1 (int) TRPV2
13731	int	TOP2A (int) DNMT1	false	int	TOP2A (int) DNMT1
13733	int	TOP2A (int) GTSE1	false	int	TOP2A (int) GTSE1
13736	int	PRNP (int) PLVAP	false	int	PRNP (int) PLVAP
13739	int	SEPT11 (int) SCARB1	false	int	SEPT11 (int) SCARB1
13742	int	SH3BGRL (int) EFEMP1	false	int	SH3BGRL (int) EFEMP1
13744	int	SH3BGRL (int) SMARCA1	false	int	SH3BGRL (int) SMARCA1
13746	int	SH3BGRL (int) LY96	false	int	SH3BGRL (int) LY96
13748	int	SH3BGRL (int) APP	false	int	SH3BGRL (int) APP
13751	int	EBNA1BP2 (int) GBP2	false	int	EBNA1BP2 (int) GBP2
13753	int	EBNA1BP2 (int) THOP1	false	int	EBNA1BP2 (int) THOP1
13755	int	EBNA1BP2 (int) GPR4	false	int	EBNA1BP2 (int) GPR4
13757	int	EBNA1BP2 (int) PIGO	false	int	EBNA1BP2 (int) PIGO
13759	int	EBNA1BP2 (int) BBS4	false	int	EBNA1BP2 (int) BBS4
13761	int	EBNA1BP2 (int) FAM136A	false	int	EBNA1BP2 (int) FAM136A
13763	int	EBNA1BP2 (int) EXOSC5	false	int	EBNA1BP2 (int) EXOSC5
13765	int	EBNA1BP2 (int) NARG1	false	int	EBNA1BP2 (int) NARG1
13767	int	EBNA1BP2 (int) SLC41A3	false	int	EBNA1BP2 (int) SLC41A3
13770	int	ENC1 (int) RPGR	false	int	ENC1 (int) RPGR
13772	int	ENC1 (int) PIK3R1	false	int	ENC1 (int) PIK3R1
13774	int	ENC1 (int) WHAMML1	false	int	ENC1 (int) WHAMML1
13777	int	CST3 (int) IGFBP6	false	int	CST3 (int) IGFBP6
13779	int	CST3 (int) TBC1D2	false	int	CST3 (int) TBC1D2
13782	int	NBR1 (int) EHD2	false	int	NBR1 (int) EHD2
13784	int	NBR1 (int) ADD1	false	int	NBR1 (int) ADD1
13786	int	NBR1 (int) SRPK2	false	int	NBR1 (int) SRPK2
13788	int	NBR1 (int) RYK	false	int	NBR1 (int) RYK
13790	int	NBR1 (int) KLF3	false	int	NBR1 (int) KLF3
13793	int	UCHL1 (int) POPDC3	false	int	UCHL1 (int) POPDC3
13795	int	ITGA5 (int) RRBP1	false	int	ITGA5 (int) RRBP1
13797	int	ITGA5 (int) TGFB1	false	int	ITGA5 (int) TGFB1
13799	int	ITGA5 (int) SC65	false	int	ITGA5 (int) SC65
13801	int	ITGA5 (int) SMPD1	false	int	ITGA5 (int) SMPD1
13803	int	ITGA5 (int) GBAP	false	int	ITGA5 (int) GBAP
13805	int	ITGA5 (int) FNDC3B	false	int	ITGA5 (int) FNDC3B
13807	int	ITGA5 (int) LEPRE1	false	int	ITGA5 (int) LEPRE1
13810	int	PHGDH (int) CBS	false	int	PHGDH (int) CBS
13812	int	TRAM1 (int) CAPRIN1	false	int	TRAM1 (int) CAPRIN1
13814	int	TRAM1 (int) THBS1	false	int	TRAM1 (int) THBS1
13816	int	TRAM1 (int) ENTPD5	false	int	TRAM1 (int) ENTPD5
13818	int	TRAM1 (int) SPAST	false	int	TRAM1 (int) SPAST
13820	int	TRAM1 (int) PRPF4B	false	int	TRAM1 (int) PRPF4B
13822	int	TRAM1 (int) TJP1	false	int	TRAM1 (int) TJP1
13824	int	TRAM1 (int) ANKFY1	false	int	TRAM1 (int) ANKFY1
13827	int	LRP10 (int) PPP3R1	false	int	LRP10 (int) PPP3R1
13828	int	LRP10 (int) SLC38A10	false	int	LRP10 (int) SLC38A10
13830	int	SOX4 (int) C5orf13	false	int	SOX4 (int) C5orf13
13832	int	SOX4 (int) LRRFIP1	false	int	SOX4 (int) LRRFIP1
13834	int	SOX4 (int) RGS2	false	int	SOX4 (int) RGS2
13836	int	SOX4 (int) HES1	false	int	SOX4 (int) HES1
13838	int	SOX4 (int) CERK	false	int	SOX4 (int) CERK
13840	int	SOX4 (int) C12orf5	false	int	SOX4 (int) C12orf5
13843	int	TIA1 (int) C21orf66	false	int	TIA1 (int) C21orf66
13846	int	SCRN1 (int) ROR1	false	int	SCRN1 (int) ROR1
13849	int	NQO1 (int) CHST2	false	int	NQO1 (int) CHST2
13851	int	NQO1 (int) SPHK1	false	int	NQO1 (int) SPHK1
13854	int	MARS (int) TIMM44	false	int	MARS (int) TIMM44
13856	int	MARS (int) FOSL1	false	int	MARS (int) FOSL1
13858	int	MARS (int) LTA4H	false	int	MARS (int) LTA4H
13860	int	MARS (int) YARS	false	int	MARS (int) YARS
13862	int	MARS (int) PDCD4	false	int	MARS (int) PDCD4
13864	int	MARS (int) CCNJ	false	int	MARS (int) CCNJ
13867	int	QSOX1 (int) DNASE1L1	false	int	QSOX1 (int) DNASE1L1
13869	int	QSOX1 (int) NLGN1	false	int	QSOX1 (int) NLGN1
13872	int	AHSA1 (int) CD58	false	int	AHSA1 (int) CD58
13875	int	PRCP (int) ART4	false	int	PRCP (int) ART4
13877	int	PRCP (int) CYB561	false	int	PRCP (int) CYB561
13880	int	NFKBIA (int) JUNB	false	int	NFKBIA (int) JUNB
13882	int	NFKBIA (int) TNIP1	false	int	NFKBIA (int) TNIP1
13885	int	TSN (int) HN1L	false	int	TSN (int) HN1L
13888	int	LAMB1 (int) GLCE	false	int	LAMB1 (int) GLCE
13891	int	IGFBP4 (int) SIRPA	false	int	IGFBP4 (int) SIRPA
13892	int	IGFBP4 (int) ABLIM3	false	int	IGFBP4 (int) ABLIM3
13894	int	IGFBP4 (int) ANGPTL2	false	int	IGFBP4 (int) ANGPTL2
13897	int	SRM (int) RPS6KB2	false	int	SRM (int) RPS6KB2
13899	int	SRM (int) OGG1	false	int	SRM (int) OGG1
13901	int	SRM (int) BOP1	false	int	SRM (int) BOP1
13904	int	ZFP36 (int) PARP12	false	int	ZFP36 (int) PARP12
13907	int	DUSP3 (int) UAP1L1	false	int	DUSP3 (int) UAP1L1
13910	int	PABPN1 (int) BSG	false	int	PABPN1 (int) BSG
13912	int	PABPN1 (int) ASXL2	false	int	PABPN1 (int) ASXL2
13915	int	CLIC4 (int) RIOK3	false	int	CLIC4 (int) RIOK3
13916	int	CLIC4 (int) TGFBR2	false	int	CLIC4 (int) TGFBR2
13918	int	CLIC4 (int) FKBP1A	false	int	CLIC4 (int) FKBP1A
13920	int	CLIC4 (int) SDHC	false	int	CLIC4 (int) SDHC
13922	int	CLIC4 (int) MBTPS1	false	int	CLIC4 (int) MBTPS1
13924	int	CLIC4 (int) PDCD1LG2	false	int	CLIC4 (int) PDCD1LG2
13926	int	CLIC4 (int) STX16	false	int	CLIC4 (int) STX16
13928	int	CLSTN1 (int) APBA2	false	int	CLSTN1 (int) APBA2
13931	int	ID2 (int) AMPH	false	int	ID2 (int) AMPH
13933	int	ID2 (int) ID3	false	int	ID2 (int) ID3
13935	int	ID2 (int) GATA2	false	int	ID2 (int) GATA2
13937	int	ID2 (int) MAPRE2	false	int	ID2 (int) MAPRE2
13939	int	GLB1 (int) PABPN1	false	int	GLB1 (int) PABPN1
13942	int	TMX4 (int) TMEM87A	false	int	TMX4 (int) TMEM87A
13945	int	NISCH (int) ABCC1	false	int	NISCH (int) ABCC1
13947	int	NISCH (int) EFEMP2	false	int	NISCH (int) EFEMP2
13949	int	NISCH (int) NINL	false	int	NISCH (int) NINL
13951	int	NISCH (int) AGRN	false	int	NISCH (int) AGRN
13953	int	NISCH (int) ZNF862	false	int	NISCH (int) ZNF862
13955	int	NISCH (int) SPG7	false	int	NISCH (int) SPG7
13957	int	NISCH (int) C6orf106	false	int	NISCH (int) C6orf106
13959	int	NISCH (int) LOC728392	false	int	NISCH (int) LOC728392
13961	int	NISCH (int) PCYOX1L	false	int	NISCH (int) PCYOX1L
13963	int	NISCH (int) LRDD	false	int	NISCH (int) LRDD
13965	int	NISCH (int) TNFRSF25	false	int	NISCH (int) TNFRSF25
13966	int	NISCH (int) KLHL7	false	int	NISCH (int) KLHL7
13968	int	NISCH (int) P4HTM	false	int	NISCH (int) P4HTM
13970	int	NISCH (int) SGSM2	false	int	NISCH (int) SGSM2
13973	int	IFITM1 (int) PGM1	false	int	IFITM1 (int) PGM1
13975	int	IFITM1 (int) LYRM1	false	int	IFITM1 (int) LYRM1
13978	int	CNN2 (int) AACS	false	int	CNN2 (int) AACS
13981	int	INSIG1 (int) LDLR	false	int	INSIG1 (int) LDLR
13984	int	IER3 (int) FLOT1	false	int	IER3 (int) FLOT1
13987	int	CYB5B (int) ZBTB20	false	int	CYB5B (int) ZBTB20
13990	int	JAK1 (int) ANO10	false	int	JAK1 (int) ANO10
13992	int	UBE2L6 (int) PSMB10	false	int	UBE2L6 (int) PSMB10
13994	int	UBE2L6 (int) RARRES3	false	int	UBE2L6 (int) RARRES3
13996	int	UBE2L6 (int) PSMB8	false	int	UBE2L6 (int) PSMB8
13998	int	UBE2L6 (int) APOL1	false	int	UBE2L6 (int) APOL1
14000	int	UBE2L6 (int) APOL3	false	int	UBE2L6 (int) APOL3
14002	int	HSPG2 (int) VGLL4	false	int	HSPG2 (int) VGLL4
14004	int	SMC4 (int) DEK	false	int	SMC4 (int) DEK
14005	int	SMC4 (int) CNN2	false	int	SMC4 (int) CNN2
14007	int	SMC4 (int) SMC3	false	int	SMC4 (int) SMC3
14009	int	SMC4 (int) NCAPD3	false	int	SMC4 (int) NCAPD3
14011	int	SMC4 (int) ATAD2	false	int	SMC4 (int) ATAD2
14014	int	MARCKS (int) CLMN	false	int	MARCKS (int) CLMN
14017	int	GYS1 (int) MAP1A	false	int	GYS1 (int) MAP1A
14019	int	GYS1 (int) MME	false	int	GYS1 (int) MME
14021	int	GYS1 (int) STX1A	false	int	GYS1 (int) STX1A
14023	int	GYS1 (int) CLEC2B	false	int	GYS1 (int) CLEC2B
14025	int	GYS1 (int) DZIP3	false	int	GYS1 (int) DZIP3
14027	int	GYS1 (int) OAZ3	false	int	GYS1 (int) OAZ3
14030	int	MYBL2 (int) TMSB15A	false	int	MYBL2 (int) TMSB15A
14032	int	TUBG1 (int) SRM	false	int	TUBG1 (int) SRM
14034	int	TUBG1 (int) CTNNB1	false	int	TUBG1 (int) CTNNB1
14036	int	TUBG1 (int) CTPS	false	int	TUBG1 (int) CTPS
14038	int	TUBG1 (int) STRA13	false	int	TUBG1 (int) STRA13
14040	int	TUBG1 (int) C21orf45	false	int	TUBG1 (int) C21orf45
14042	int	TUBG1 (int) GMPPB	false	int	TUBG1 (int) GMPPB
14045	int	SFRS1 (int) NET1	false	int	SFRS1 (int) NET1
14047	int	SFRS1 (int) CPSF6	false	int	SFRS1 (int) CPSF6
14049	int	SFRS1 (int) SFRS3	false	int	SFRS1 (int) SFRS3
14051	int	SFRS1 (int) TFDP1	false	int	SFRS1 (int) TFDP1
14053	int	SFRS1 (int) STIP1	false	int	SFRS1 (int) STIP1
14055	int	SFRS1 (int) NUDT21	false	int	SFRS1 (int) NUDT21
14057	int	SFRS1 (int) SPATA2L	false	int	SFRS1 (int) SPATA2L
14059	int	SFRS1 (int) MAST4	false	int	SFRS1 (int) MAST4
14062	int	ECE1 (int) PNPLA6	false	int	ECE1 (int) PNPLA6
14064	int	ECE1 (int) THBD	false	int	ECE1 (int) THBD
14066	int	ECE1 (int) DDX3Y	false	int	ECE1 (int) DDX3Y
14068	int	ECE1 (int) ARHGEF15	false	int	ECE1 (int) ARHGEF15
14070	int	ECE1 (int) MCAM	false	int	ECE1 (int) MCAM
14072	int	ECE1 (int) OS9	false	int	ECE1 (int) OS9
14074	int	ECE1 (int) PCDHGA1	false	int	ECE1 (int) PCDHGA1
14076	int	ECE1 (int) RHBDF1	false	int	ECE1 (int) RHBDF1
14079	int	MTHFD2 (int) CEBPG	false	int	MTHFD2 (int) CEBPG
14081	int	MTHFD2 (int) GOT1	false	int	MTHFD2 (int) GOT1
14083	int	MTHFD2 (int) VEGFA	false	int	MTHFD2 (int) VEGFA
14085	int	MTHFD2 (int) CEBPB	false	int	MTHFD2 (int) CEBPB
14087	int	MTHFD2 (int) ZCCHC8	false	int	MTHFD2 (int) ZCCHC8
14089	int	MTHFD2 (int) THG1L	false	int	MTHFD2 (int) THG1L
14091	int	MTHFD2 (int) PSAT1	false	int	MTHFD2 (int) PSAT1
14094	int	CLINT1 (int) TRRAP	false	int	CLINT1 (int) TRRAP
14096	int	CLINT1 (int) LIMD1	false	int	CLINT1 (int) LIMD1
14099	int	AIP (int) ADNP	false	int	AIP (int) ADNP
14102	int	LBR (int) CUBN	false	int	LBR (int) CUBN
14104	int	VARS (int) EIF5B	false	int	VARS (int) EIF5B
14105	int	VARS (int) THOP1	false	int	VARS (int) THOP1
14107	int	VARS (int) C16orf35	false	int	VARS (int) C16orf35
14109	int	VARS (int) HIPK1	false	int	VARS (int) HIPK1
14111	int	VARS (int) NCLN	false	int	VARS (int) NCLN
14113	int	VARS (int) STOML1	false	int	VARS (int) STOML1
14116	int	ENG (int) FSTL1	false	int	ENG (int) FSTL1
14118	int	SH3BP5 (int) DOCK4	false	int	SH3BP5 (int) DOCK4
14121	int	TBC1D5 (int) MFSD10	false	int	TBC1D5 (int) MFSD10
14124	int	LPCAT1 (int) ELF1	false	int	LPCAT1 (int) ELF1
14126	int	NET1 (int) FLJ42627	false	int	NET1 (int) FLJ42627
14129	int	SUPT7L (int) RANBP2	false	int	SUPT7L (int) RANBP2
14132	int	LIPA (int) SSBP2	false	int	LIPA (int) SSBP2
14135	int	PLAT (int) IKBKB	false	int	PLAT (int) IKBKB
14137	int	PLAT (int) AHNAK2	false	int	PLAT (int) AHNAK2
14139	int	PLAT (int) ZDHHC13	false	int	PLAT (int) ZDHHC13
14141	int	PLAT (int) LPCAT4	false	int	PLAT (int) LPCAT4
14143	int	LRRFIP1 (int) CCDC91	false	int	LRRFIP1 (int) CCDC91
14145	int	LRRFIP1 (int) ECT2	false	int	LRRFIP1 (int) ECT2
14148	int	NR3C1 (int) PCBD1	false	int	NR3C1 (int) PCBD1
14150	int	NR3C1 (int) FST	false	int	NR3C1 (int) FST
14152	int	NR3C1 (int) RBMS1	false	int	NR3C1 (int) RBMS1
14155	int	CKS1B (int) CALCOCO1	false	int	CKS1B (int) CALCOCO1
14157	int	CKS1B (int) PLXND1	false	int	CKS1B (int) PLXND1
14159	int	CKS1B (int) PBXIP1	false	int	CKS1B (int) PBXIP1
14161	int	CKS1B (int) CCDC99	false	int	CKS1B (int) CCDC99
14164	int	CTDSPL (int) PTPN4	false	int	CTDSPL (int) PTPN4
14167	int	SEC63 (int) HIRA	false	int	SEC63 (int) HIRA
14170	int	MCM6 (int) MCM3	false	int	MCM6 (int) MCM3
14172	int	MCM6 (int) MCM2	false	int	MCM6 (int) MCM2
14174	int	MCM6 (int) TP53I3	false	int	MCM6 (int) TP53I3
14177	int	CPD (int) LMBRD1	false	int	CPD (int) LMBRD1
14180	int	CCT2 (int) NOLC1	false	int	CCT2 (int) NOLC1
14182	int	ATP6V1A (int) PRKAR1A	false	int	ATP6V1A (int) PRKAR1A
14184	int	ATP6V1A (int) CNN3	false	int	ATP6V1A (int) CNN3
14186	int	ATP6V1A (int) HIPK3	false	int	ATP6V1A (int) HIPK3
14188	int	ATP6V1A (int) FLOT2	false	int	ATP6V1A (int) FLOT2
14190	int	ATP6V1A (int) ARPC4	false	int	ATP6V1A (int) ARPC4
14192	int	ATP6V1A (int) MYOF	false	int	ATP6V1A (int) MYOF
14193	int	ATP6V1A (int) INTS1	false	int	ATP6V1A (int) INTS1
14195	int	ATP6V1A (int) COPA	false	int	ATP6V1A (int) COPA
14197	int	ATP6V1A (int) MED28	false	int	ATP6V1A (int) MED28
14199	int	ATP6V1A (int) KIAA1033	false	int	ATP6V1A (int) KIAA1033
14201	int	ATP6V1A (int) ARFGEF1	false	int	ATP6V1A (int) ARFGEF1
14204	int	CREBL2 (int) GDE1	false	int	CREBL2 (int) GDE1
14206	int	CREBL2 (int) CDYL	false	int	CREBL2 (int) CDYL
14209	int	HNRPDL (int) MAP2K3	false	int	HNRPDL (int) MAP2K3
14212	int	SPEN (int) KIAA0562	false	int	SPEN (int) KIAA0562
14214	int	SPEN (int) WASL	false	int	SPEN (int) WASL
14216	int	SPEN (int) NFAT5	false	int	SPEN (int) NFAT5
14218	int	SPEN (int) SFRS2IP	false	int	SPEN (int) SFRS2IP
14220	int	ST6GAL1 (int) STAT1	false	int	ST6GAL1 (int) STAT1
14221	int	ST6GAL1 (int) PRCP	false	int	ST6GAL1 (int) PRCP
14223	int	ST6GAL1 (int) RARB	false	int	ST6GAL1 (int) RARB
14225	int	ST6GAL1 (int) COLEC12	false	int	ST6GAL1 (int) COLEC12
14227	int	NID1 (int) SGCE	false	int	NID1 (int) SGCE
14229	int	LANCL1 (int) APC	false	int	LANCL1 (int) APC
14232	int	ALDOC (int) C19orf54	false	int	ALDOC (int) C19orf54
14234	int	KPNA1 (int) MAZ	false	int	KPNA1 (int) MAZ
14236	int	LDLR (int) TBC1D4	false	int	LDLR (int) TBC1D4
14238	int	LDLR (int) NPTX1	false	int	LDLR (int) NPTX1
14240	int	LDLR (int) EHD4	false	int	LDLR (int) EHD4
14243	int	IDH3A (int) TCF7L2	false	int	IDH3A (int) TCF7L2
14246	int	OPTN (int) RPA2	false	int	OPTN (int) RPA2
14248	int	OPTN (int) TIMP2	false	int	OPTN (int) TIMP2
14250	int	OPTN (int) DLEU1	false	int	OPTN (int) DLEU1
14252	int	OPTN (int) GABARAPL1	false	int	OPTN (int) GABARAPL1
14254	int	OPTN (int) RRAS	false	int	OPTN (int) RRAS
14256	int	OPTN (int) E2F8	false	int	OPTN (int) E2F8
14258	int	OPTN (int) SLC2A6	false	int	OPTN (int) SLC2A6
14260	int	OPTN (int) SSH1	false	int	OPTN (int) SSH1
14263	int	SLC39A6 (int) RAB32	false	int	SLC39A6 (int) RAB32
14265	int	SLC39A6 (int) PLK3	false	int	SLC39A6 (int) PLK3
14267	int	SLC39A6 (int) HPCAL1	false	int	SLC39A6 (int) HPCAL1
14269	int	SLC39A6 (int) FN1	false	int	SLC39A6 (int) FN1
14271	int	SLC39A6 (int) MYRIP	false	int	SLC39A6 (int) MYRIP
14273	int	SLC39A6 (int) PIGG	false	int	SLC39A6 (int) PIGG
14275	int	SLC39A6 (int) MIR21	false	int	SLC39A6 (int) MIR21
14278	int	RALB (int) PROSC	false	int	RALB (int) PROSC
14280	int	RALB (int) ADAM15	false	int	RALB (int) ADAM15
14282	int	BRD4 (int) PRKCSH	false	int	BRD4 (int) PRKCSH
14283	int	BRD4 (int) TBC1D5	false	int	BRD4 (int) TBC1D5
14285	int	BRD4 (int) SEC14L1	false	int	BRD4 (int) SEC14L1
14287	int	BRD4 (int) NFIC	false	int	BRD4 (int) NFIC
14289	int	BRD4 (int) MINPP1	false	int	BRD4 (int) MINPP1
14291	int	BRD4 (int) LARP1	false	int	BRD4 (int) LARP1
14293	int	BRD4 (int) MTDH	false	int	BRD4 (int) MTDH
14295	int	BRD4 (int) ZNF609	false	int	BRD4 (int) ZNF609
14297	int	BRD4 (int) ANKRD11	false	int	BRD4 (int) ANKRD11
14299	int	BRD4 (int) MED16	false	int	BRD4 (int) MED16
14301	int	MCM2 (int) MCM5	false	int	MCM2 (int) MCM5
14304	int	SNX2 (int) TMEM135	false	int	SNX2 (int) TMEM135
14306	int	RIOK3 (int) UBE2G2	false	int	RIOK3 (int) UBE2G2
14309	int	WWTR1 (int) FAM190B	false	int	WWTR1 (int) FAM190B
14312	int	IFRD1 (int) NFIL3	false	int	IFRD1 (int) NFIL3
14314	int	IFRD1 (int) DDIT3	false	int	IFRD1 (int) DDIT3
14317	int	PYCR1 (int) ROBO3	false	int	PYCR1 (int) ROBO3
14320	int	CUGBP2 (int) SLC9A3R2	false	int	CUGBP2 (int) SLC9A3R2
14323	int	KIF22 (int) ADD2	false	int	KIF22 (int) ADD2
14326	int	PPP2R5A (int) SERPINB1	false	int	PPP2R5A (int) SERPINB1
14328	int	SRPK1 (int) IMPAD1	false	int	SRPK1 (int) IMPAD1
14331	int	FADS2 (int) DHCR24	false	int	FADS2 (int) DHCR24
14333	int	FADS2 (int) LSS	false	int	FADS2 (int) LSS
14335	int	FADS2 (int) FADS1	false	int	FADS2 (int) FADS1
14338	int	KIAA0907 (int) RBBP6	false	int	KIAA0907 (int) RBBP6
14340	int	KIAA0907 (int) C1orf63	false	int	KIAA0907 (int) C1orf63
14342	int	KIAA0907 (int) SEC24A	false	int	KIAA0907 (int) SEC24A
14344	int	KIAA0907 (int) ZFC3H1	false	int	KIAA0907 (int) ZFC3H1
14347	int	SLC16A1 (int) MAP3K3	false	int	SLC16A1 (int) MAP3K3
14349	int	SLC16A1 (int) ERO1L	false	int	SLC16A1 (int) ERO1L
14352	int	NNMT (int) WARS	false	int	NNMT (int) WARS
14354	int	NNMT (int) SAV1	false	int	NNMT (int) SAV1
14357	int	PLK1 (int) CDKN3	false	int	PLK1 (int) CDKN3
14360	int	TSPAN7 (int) MGP	false	int	TSPAN7 (int) MGP
14362	int	TSPAN7 (int) DPP4	false	int	TSPAN7 (int) DPP4
14364	int	TSPAN7 (int) CFI	false	int	TSPAN7 (int) CFI
14366	int	TSPAN7 (int) MGMT	false	int	TSPAN7 (int) MGMT
14368	int	TSPAN7 (int) PDGFRL	false	int	TSPAN7 (int) PDGFRL
14370	int	TSPAN7 (int) RUNX1T1	false	int	TSPAN7 (int) RUNX1T1
14372	int	TSPAN7 (int) IL33	false	int	TSPAN7 (int) IL33
14374	int	TSPAN7 (int) FOXC1	false	int	TSPAN7 (int) FOXC1
14376	int	TSPAN7 (int) ATP2B1	false	int	TSPAN7 (int) ATP2B1
14378	int	TSPAN7 (int) JAM2	false	int	TSPAN7 (int) JAM2
14381	int	SPTLC1 (int) TM9SF4	false	int	SPTLC1 (int) TM9SF4
14384	int	CDKN1A (int) IP6K2	false	int	CDKN1A (int) IP6K2
14386	int	CDKN1A (int) GDF15	false	int	CDKN1A (int) GDF15
14389	int	MTHFD1 (int) TUBGCP4	false	int	MTHFD1 (int) TUBGCP4
14392	int	COL1A1 (int) COL1A2	false	int	COL1A1 (int) COL1A2
14394	int	COL1A1 (int) VCAN	false	int	COL1A1 (int) VCAN
14397	int	TK1 (int) STMN1	false	int	TK1 (int) STMN1
14399	int	TK1 (int) DHRS1	false	int	TK1 (int) DHRS1
14402	int	FABP5 (int) FABP4	false	int	FABP5 (int) FABP4
14404	int	FABP5 (int) TRAF3IP2	false	int	FABP5 (int) TRAF3IP2
14406	int	FABP5 (int) LAP3	false	int	FABP5 (int) LAP3
14408	int	ITGAV (int) SLC39A6	false	int	ITGAV (int) SLC39A6
14410	int	ITGAV (int) ING3	false	int	ITGAV (int) ING3
14412	int	ITGAV (int) SAT1	false	int	ITGAV (int) SAT1
14414	int	ITGAV (int) TPM1	false	int	ITGAV (int) TPM1
14416	int	ITGAV (int) RHOB	false	int	ITGAV (int) RHOB
14418	int	ITGAV (int) PVR	false	int	ITGAV (int) PVR
14420	int	ITGAV (int) OSTM1	false	int	ITGAV (int) OSTM1
14422	int	ITGAV (int) LIPG	false	int	ITGAV (int) LIPG
14425	int	MXI1 (int) FAM149B1	false	int	MXI1 (int) FAM149B1
14428	int	TRAM2 (int) ARL4C	false	int	TRAM2 (int) ARL4C
14430	int	TRAM2 (int) EFHC1	false	int	TRAM2 (int) EFHC1
14432	int	TRAM2 (int) FAM131A	false	int	TRAM2 (int) FAM131A
14435	int	TCOF1 (int) TM2D1	false	int	TCOF1 (int) TM2D1
14437	int	TCOF1 (int) CTBS	false	int	TCOF1 (int) CTBS
14439	int	COL1A2 (int) S100A4	false	int	COL1A2 (int) S100A4
14441	int	COL1A2 (int) IGFBP5	false	int	COL1A2 (int) IGFBP5
14444	int	PRPF31 (int) C1orf144	false	int	PRPF31 (int) C1orf144
14447	int	IFI27 (int) BST2	false	int	IFI27 (int) BST2
14450	int	USP1 (int) TAOK2	false	int	USP1 (int) TAOK2
14452	int	PPP3CA (int) LIPA	false	int	PPP3CA (int) LIPA
14454	int	PPP3CA (int) GCA	false	int	PPP3CA (int) GCA
14456	int	PPP3CA (int) DACH1	false	int	PPP3CA (int) DACH1
14458	int	PPP3CA (int) LY75	false	int	PPP3CA (int) LY75
14460	int	PPP3CA (int) SETBP1	false	int	PPP3CA (int) SETBP1
14462	int	PPP3CA (int) LYPD1	false	int	PPP3CA (int) LYPD1
14464	int	PPP3CA (int) MAN1A1	false	int	PPP3CA (int) MAN1A1
14466	int	PPP3CA (int) FLT1	false	int	PPP3CA (int) FLT1
14469	int	NOTCH2 (int) SMOX	false	int	NOTCH2 (int) SMOX
14470	int	ERLIN1 (int) CYB5B	false	int	ERLIN1 (int) CYB5B
14472	int	ERLIN1 (int) DDX18	false	int	ERLIN1 (int) DDX18
14474	int	ERLIN1 (int) TMX1	false	int	ERLIN1 (int) TMX1
14476	int	ERLIN1 (int) EZR	false	int	ERLIN1 (int) EZR
14478	int	ERLIN1 (int) ARPP19	false	int	ERLIN1 (int) ARPP19
14480	int	ERLIN1 (int) LDB1	false	int	ERLIN1 (int) LDB1
14482	int	HDAC5 (int) CEP170	false	int	HDAC5 (int) CEP170
14483	int	HDAC5 (int) ANGPTL2	false	int	HDAC5 (int) ANGPTL2
14485	int	HDAC5 (int) NOL6	false	int	HDAC5 (int) NOL6
14488	int	PRSS23 (int) SPOCK1	false	int	PRSS23 (int) SPOCK1
14491	int	EIF2B2 (int) CDC42EP3	false	int	EIF2B2 (int) CDC42EP3
14493	int	EIF2B2 (int) NXN	false	int	EIF2B2 (int) NXN
14496	int	RANBP1 (int) MRPL42	false	int	RANBP1 (int) MRPL42
14499	int	SLC2A3 (int) SLC2A14	false	int	SLC2A3 (int) SLC2A14
14501	int	DLG1 (int) LDLR	false	int	DLG1 (int) LDLR
14503	int	DLG1 (int) LAMA3	false	int	DLG1 (int) LAMA3
14506	int	GMFB (int) RNF14	false	int	GMFB (int) RNF14
14508	int	GMFB (int) PXMP3	false	int	GMFB (int) PXMP3
14510	int	GMFB (int) PHTF1	false	int	GMFB (int) PHTF1
14513	int	PRKCD (int) RRP1B	false	int	PRKCD (int) RRP1B
14516	int	MYLK (int) QPCT	false	int	MYLK (int) QPCT
14518	int	MYLK (int) PDE10A	false	int	MYLK (int) PDE10A
14521	int	SVIL (int) DBN1	false	int	SVIL (int) DBN1
14524	int	DLGAP4 (int) LIN37	false	int	DLGAP4 (int) LIN37
14526	int	DLGAP4 (int) SNX5	false	int	DLGAP4 (int) SNX5
14529	int	FOXM1 (int) ABCG1	false	int	FOXM1 (int) ABCG1
14531	int	FOXM1 (int) MAGED2	false	int	FOXM1 (int) MAGED2
14533	int	FOXM1 (int) COL4A5	false	int	FOXM1 (int) COL4A5
14535	int	FOXM1 (int) LMNB2	false	int	FOXM1 (int) LMNB2
14538	int	NRIP1 (int) DUSP6	false	int	NRIP1 (int) DUSP6
14541	int	ADAM10 (int) NOC4L	false	int	ADAM10 (int) NOC4L
14544	int	EPS8 (int) HMOX2	false	int	EPS8 (int) HMOX2
14546	int	PLOD2 (int) QSOX1	false	int	PLOD2 (int) QSOX1
14548	int	PLOD2 (int) ZNF124	false	int	PLOD2 (int) ZNF124
14550	int	PLOD2 (int) CD44	false	int	PLOD2 (int) CD44
14552	int	PLOD2 (int) THOC6	false	int	PLOD2 (int) THOC6
14555	int	SERPINE1 (int) ANP32A	false	int	SERPINE1 (int) ANP32A
14557	int	SERPINE1 (int) CALD1	false	int	SERPINE1 (int) CALD1
14558	int	SERPINE1 (int) LBR	false	int	SERPINE1 (int) LBR
14560	int	SERPINE1 (int) PLAU	false	int	SERPINE1 (int) PLAU
14562	int	SERPINE1 (int) SMURF2	false	int	SERPINE1 (int) SMURF2
14564	int	SERPINE1 (int) METTL7A	false	int	SERPINE1 (int) METTL7A
14566	int	SERPINE1 (int) GPR37	false	int	SERPINE1 (int) GPR37
14568	int	SERPINE1 (int) ZNF395	false	int	SERPINE1 (int) ZNF395
14571	int	APPBP2 (int) BSCL2	false	int	APPBP2 (int) BSCL2
14573	int	APPBP2 (int) RPL31	false	int	APPBP2 (int) RPL31
14575	int	ICAM1 (int) NFKBIA	false	int	ICAM1 (int) NFKBIA
14577	int	ICAM1 (int) SDC4	false	int	ICAM1 (int) SDC4
14579	int	ICAM1 (int) GPRC5B	false	int	ICAM1 (int) GPRC5B
14582	int	TNFAIP3 (int) GADD45A	false	int	TNFAIP3 (int) GADD45A
14584	int	TNFAIP3 (int) NFKBIE	false	int	TNFAIP3 (int) NFKBIE
14587	int	NRAS (int) GABPA	false	int	NRAS (int) GABPA
14589	int	NRAS (int) IKZF5	false	int	NRAS (int) IKZF5
14592	int	MARCH7 (int) TWSG1	false	int	MARCH7 (int) TWSG1
14594	int	MANF (int) HYOU1	false	int	MANF (int) HYOU1
14596	int	MANF (int) DNAJB9	false	int	MANF (int) DNAJB9
14598	int	MANF (int) HSPA5	false	int	MANF (int) HSPA5
14600	int	MANF (int) PDE4DIP	false	int	MANF (int) PDE4DIP
14602	int	MANF (int) SRPRB	false	int	MANF (int) SRPRB
14605	int	EFNB2 (int) MERTK	false	int	EFNB2 (int) MERTK
14607	int	ATF3 (int) NNMT	false	int	ATF3 (int) NNMT
14609	int	ATF3 (int) ARID5B	false	int	ATF3 (int) ARID5B
14612	int	AXL (int) UPP1	false	int	AXL (int) UPP1
14614	int	AXL (int) PRKCA	false	int	AXL (int) PRKCA
14616	int	TNFSF10 (int) EFNA1	false	int	TNFSF10 (int) EFNA1
14617	int	TNFSF10 (int) EFNB2	false	int	TNFSF10 (int) EFNB2
14619	int	TNFSF10 (int) IFNGR1	false	int	TNFSF10 (int) IFNGR1
14621	int	TNFSF10 (int) IFIH1	false	int	TNFSF10 (int) IFIH1
14624	int	CCNB2 (int) BIRC5	false	int	CCNB2 (int) BIRC5
14625	int	CCNB2 (int) TK1	false	int	CCNB2 (int) TK1
14627	int	CCNB2 (int) UBE2C	false	int	CCNB2 (int) UBE2C
14629	int	CCNB2 (int) HMGB3	false	int	CCNB2 (int) HMGB3
14631	int	CCNB2 (int) NDC80	false	int	CCNB2 (int) NDC80
14633	int	CCNB2 (int) PLK4	false	int	CCNB2 (int) PLK4
14635	int	CCNB2 (int) CENPA	false	int	CCNB2 (int) CENPA
14637	int	CCNB2 (int) WHSC1	false	int	CCNB2 (int) WHSC1
14639	int	CCNB2 (int) AURKB	false	int	CCNB2 (int) AURKB
14641	int	CCNB2 (int) RPA3	false	int	CCNB2 (int) RPA3
14643	int	CCNB2 (int) CCNB1	false	int	CCNB2 (int) CCNB1
14645	int	CCNB2 (int) ERCC6L	false	int	CCNB2 (int) ERCC6L
14648	int	UMPS (int) DKC1	false	int	UMPS (int) DKC1
14650	int	UMPS (int) RCL1	false	int	UMPS (int) RCL1
14653	int	BET1 (int) CTSL1	false	int	BET1 (int) CTSL1
14656	int	GFPT1 (int) SR140	false	int	GFPT1 (int) SR140
14659	int	LTBP1 (int) VAMP8	false	int	LTBP1 (int) VAMP8
14661	int	LTBP1 (int) GATA3	false	int	LTBP1 (int) GATA3
14664	int	PHKB (int) TMEM149	false	int	PHKB (int) TMEM149
14666	int	PIK3R3 (int) ENC1	false	int	PIK3R3 (int) ENC1
14668	int	PIK3R3 (int) DFNA5	false	int	PIK3R3 (int) DFNA5
14669	int	GBP2 (int) GSN	false	int	GBP2 (int) GSN
14671	int	GBP2 (int) RPS6KA2	false	int	GBP2 (int) RPS6KA2
14673	int	GBP2 (int) TMEM140	false	int	GBP2 (int) TMEM140
14676	int	AKAP2 (int) S1PR1	false	int	AKAP2 (int) S1PR1
14678	int	PALM2-AKAP2 (int) DUSP1	false	int	PALM2-AKAP2 (int) DUSP1
14680	int	PALM2-AKAP2 (int) PLEC1	false	int	PALM2-AKAP2 (int) PLEC1
14682	int	PALM2-AKAP2 (int) SGK1	false	int	PALM2-AKAP2 (int) SGK1
14683	int	PALM2-AKAP2 (int) AKAP2	false	int	PALM2-AKAP2 (int) AKAP2
14685	int	PALM2-AKAP2 (int) PNPLA4	false	int	PALM2-AKAP2 (int) PNPLA4
14687	int	PALM2-AKAP2 (int) PLAUR	false	int	PALM2-AKAP2 (int) PLAUR
14689	int	PALM2-AKAP2 (int) SASH1	false	int	PALM2-AKAP2 (int) SASH1
14691	int	PALM2-AKAP2 (int) GALNT6	false	int	PALM2-AKAP2 (int) GALNT6
14694	int	SYNE2 (int) SYNM	false	int	SYNE2 (int) SYNM
14697	int	CASP3 (int) RWDD2B	false	int	CASP3 (int) RWDD2B
14700	int	FBN1 (int) F2R	false	int	FBN1 (int) F2R
14702	int	FBN1 (int) NUAK1	false	int	FBN1 (int) NUAK1
14704	int	FBN1 (int) JAG1	false	int	FBN1 (int) JAG1
14706	int	FBN1 (int) COL5A2	false	int	FBN1 (int) COL5A2
14709	int	CCNG2 (int) FAM164A	false	int	CCNG2 (int) FAM164A
14711	int	CCNG2 (int) PHF15	false	int	CCNG2 (int) PHF15
14714	int	HMGCL (int) NIPSNAP1	false	int	HMGCL (int) NIPSNAP1
14716	int	HMGCL (int) PRMT2	false	int	HMGCL (int) PRMT2
14718	int	HMGCL (int) NME3	false	int	HMGCL (int) NME3
14720	int	HMGCL (int) TM7SF2	false	int	HMGCL (int) TM7SF2
14722	int	HMGCL (int) CLASP2	false	int	HMGCL (int) CLASP2
14724	int	HMGCL (int) ERCC2	false	int	HMGCL (int) ERCC2
14725	int	HMGCL (int) C19orf54	false	int	HMGCL (int) C19orf54
14727	int	HMGCL (int) ASMTL	false	int	HMGCL (int) ASMTL
14730	int	UBE2S (int) PLP2	false	int	UBE2S (int) PLP2
14732	int	UBE2S (int) ADARB1	false	int	UBE2S (int) ADARB1
14734	int	UBE2S (int) C12orf35	false	int	UBE2S (int) C12orf35
14736	int	UBE2S (int) CRYL1	false	int	UBE2S (int) CRYL1
14738	int	UBE2S (int) C19orf66	false	int	UBE2S (int) C19orf66
14740	int	STK39 (int) NOTCH2	false	int	STK39 (int) NOTCH2
14743	int	SYNPO (int) EHD1	false	int	SYNPO (int) EHD1
14745	int	SYNPO (int) SPRED2	false	int	SYNPO (int) SPRED2
14747	int	DBN1 (int) DYNC1H1	false	int	DBN1 (int) DYNC1H1
14750	int	HEXIM1 (int) ANKRD55	false	int	HEXIM1 (int) ANKRD55
14752	int	DNAJB9 (int) SLC33A1	false	int	DNAJB9 (int) SLC33A1
14754	int	DNAJB9 (int) HERPUD1	false	int	DNAJB9 (int) HERPUD1
14756	int	DNAJB9 (int) EIF2AK3	false	int	DNAJB9 (int) EIF2AK3
14758	int	DNAJB9 (int) FICD	false	int	DNAJB9 (int) FICD
14759	int	PCK2 (int) PHGDH	false	int	PCK2 (int) PHGDH
14761	int	PCK2 (int) SLC1A5	false	int	PCK2 (int) SLC1A5
14763	int	PCK2 (int) SHMT2	false	int	PCK2 (int) SHMT2
14765	int	SLC16A3 (int) SYNE2	false	int	SLC16A3 (int) SYNE2
14767	int	SLC16A3 (int) EEF1A2	false	int	SLC16A3 (int) EEF1A2
14769	int	SLC16A3 (int) TBC1D15	false	int	SLC16A3 (int) TBC1D15
14772	int	IL8 (int) CXCL3	false	int	IL8 (int) CXCL3
14775	int	OAS1 (int) HYAL1	false	int	OAS1 (int) HYAL1
14777	int	CDC20 (int) SH3BGRL	false	int	CDC20 (int) SH3BGRL
14778	int	CDC20 (int) TUBG1	false	int	CDC20 (int) TUBG1
14780	int	CDC20 (int) LAMA4	false	int	CDC20 (int) LAMA4
14781	int	CDC20 (int) UBE2S	false	int	CDC20 (int) UBE2S
14783	int	CDC20 (int) DHRS12	false	int	CDC20 (int) DHRS12
14785	int	CDC20 (int) KIAA0586	false	int	CDC20 (int) KIAA0586
14787	int	CDC20 (int) CSE1L	false	int	CDC20 (int) CSE1L
14789	int	CDC20 (int) MKI67	false	int	CDC20 (int) MKI67
14791	int	CDC20 (int) PAM	false	int	CDC20 (int) PAM
14793	int	CDC20 (int) TMEM8A	false	int	CDC20 (int) TMEM8A
14795	int	CDC20 (int) WRAP53	false	int	CDC20 (int) WRAP53
14798	int	TRAF4 (int) EIF3C	false	int	TRAF4 (int) EIF3C
14801	int	DDIT4 (int) TSC22D3	false	int	DDIT4 (int) TSC22D3
14803	int	ANPEP (int) CST3	false	int	ANPEP (int) CST3
14805	int	ANPEP (int) CCND1	false	int	ANPEP (int) CCND1
14807	int	ANPEP (int) SEPT6	false	int	ANPEP (int) SEPT6
14809	int	ANPEP (int) ABHD4	false	int	ANPEP (int) ABHD4
14811	int	ANPEP (int) SOBP	false	int	ANPEP (int) SOBP
14814	int	UNC13B (int) EPB49	false	int	UNC13B (int) EPB49
14816	int	UNC13B (int) PLEKHM1	false	int	UNC13B (int) PLEKHM1
14818	int	UNC13B (int) ANGEL1	false	int	UNC13B (int) ANGEL1
14820	int	UNC13B (int) YPEL1	false	int	UNC13B (int) YPEL1
14822	int	UNC13B (int) ALAD	false	int	UNC13B (int) ALAD
14824	int	UNC13B (int) RGNEF	false	int	UNC13B (int) RGNEF
14827	int	CTSS (int) ISG20	false	int	CTSS (int) ISG20
14830	int	LSM5 (int) FPGT	false	int	LSM5 (int) FPGT
14832	int	LSM5 (int) CETN3	false	int	LSM5 (int) CETN3
14834	int	LSM5 (int) IPO5	false	int	LSM5 (int) IPO5
14837	int	WFS1 (int) ARHGAP22	false	int	WFS1 (int) ARHGAP22
14839	int	WFS1 (int) ORAI2	false	int	WFS1 (int) ORAI2
14841	int	WFS1 (int) RHBDF2	false	int	WFS1 (int) RHBDF2
14844	int	HK2 (int) IL15	false	int	HK2 (int) IL15
14846	int	HK2 (int) NOP16	false	int	HK2 (int) NOP16
14848	int	HK2 (int) NOP2	false	int	HK2 (int) NOP2
14850	int	HK2 (int) NOC3L	false	int	HK2 (int) NOC3L
14853	int	IL1R1 (int) C10orf116	false	int	IL1R1 (int) C10orf116
14855	int	IL1R1 (int) PDLIM3	false	int	IL1R1 (int) PDLIM3
14857	int	IL1R1 (int) HEG1	false	int	IL1R1 (int) HEG1
14859	int	IL1R1 (int) DIXDC1	false	int	IL1R1 (int) DIXDC1
14861	int	IL1R1 (int) CCRL1	false	int	IL1R1 (int) CCRL1
14863	int	UBE2C (int) IDUA	false	int	UBE2C (int) IDUA
14865	int	UBE2C (int) GPSM2	false	int	UBE2C (int) GPSM2
14867	int	UBE2C (int) CDCA8	false	int	UBE2C (int) CDCA8
14870	int	MPP1 (int) SERTAD2	false	int	MPP1 (int) SERTAD2
14872	int	MPP1 (int) HOMER1	false	int	MPP1 (int) HOMER1
14874	int	MPP1 (int) PDGFC	false	int	MPP1 (int) PDGFC
14876	int	MPP1 (int) KLHL3	false	int	MPP1 (int) KLHL3
14878	int	SSX2IP (int) NR3C1	false	int	SSX2IP (int) NR3C1
14880	int	SSX2IP (int) RNF41	false	int	SSX2IP (int) RNF41
14882	int	SSX2IP (int) PLS1	false	int	SSX2IP (int) PLS1
14884	int	SSX2IP (int) WWC3	false	int	SSX2IP (int) WWC3
14887	int	FH (int) FUSIP1	false	int	FH (int) FUSIP1
14889	int	FH (int) BRCC3	false	int	FH (int) BRCC3
14891	int	FH (int) hCG_2024410	false	int	FH (int) hCG_2024410
14893	int	FH (int) AIDA	false	int	FH (int) AIDA
14895	int	FH (int) GPHN	false	int	FH (int) GPHN
14897	int	FH (int) LYRM2	false	int	FH (int) LYRM2
14899	int	LAMP2 (int) PPAP2A	false	int	LAMP2 (int) PPAP2A
14901	int	TTC37 (int) KTN1	false	int	TTC37 (int) KTN1
14903	int	TTC37 (int) MAGT1	false	int	TTC37 (int) MAGT1
14906	int	CHST15 (int) SULT1B1	false	int	CHST15 (int) SULT1B1
14908	int	CHST15 (int) CORO2B	false	int	CHST15 (int) CORO2B
14911	int	KLHL21 (int) TSEN2	false	int	KLHL21 (int) TSEN2
14914	int	MYO1E (int) GBP1	false	int	MYO1E (int) GBP1
14917	int	CTNNBIP1 (int) ME3	false	int	CTNNBIP1 (int) ME3
14919	int	CTNNBIP1 (int) APBB2	false	int	CTNNBIP1 (int) APBB2
14921	int	TIMM44 (int) PCMTD2	false	int	TIMM44 (int) PCMTD2
14924	int	MTIF2 (int) NIT1	false	int	MTIF2 (int) NIT1
14927	int	GPRC5A (int) BDNF	false	int	GPRC5A (int) BDNF
14929	int	GPRC5A (int) ANXA3	false	int	GPRC5A (int) ANXA3
14932	int	SSSCA1 (int) DVL3	false	int	SSSCA1 (int) DVL3
14933	int	SSSCA1 (int) APPBP2	false	int	SSSCA1 (int) APPBP2
14935	int	SSSCA1 (int) DKK1	false	int	SSSCA1 (int) DKK1
14938	int	CCDC86 (int) POLRMT	false	int	CCDC86 (int) POLRMT
14940	int	CCDC86 (int) AKAP9	false	int	CCDC86 (int) AKAP9
14943	int	IMPA2 (int) UNG	false	int	IMPA2 (int) UNG
14946	int	SPAG5 (int) NCAPD2	false	int	SPAG5 (int) NCAPD2
14948	int	SPAG5 (int) NCAPG	false	int	SPAG5 (int) NCAPG
14950	int	SPAG5 (int) CEP70	false	int	SPAG5 (int) CEP70
14953	int	PVRL2 (int) CTSZ	false	int	PVRL2 (int) CTSZ
14955	int	GLS (int) HNRPDL	false	int	GLS (int) HNRPDL
14957	int	GLS (int) PRDM2	false	int	GLS (int) PRDM2
14959	int	GLS (int) ST7	false	int	GLS (int) ST7
14961	int	TIMP2 (int) CLIP3	false	int	TIMP2 (int) CLIP3
14963	int	TIMP2 (int) DDAH2	false	int	TIMP2 (int) DDAH2
14965	int	TIMP2 (int) TSR1	false	int	TIMP2 (int) TSR1
14968	int	RRP8 (int) NFYA	false	int	RRP8 (int) NFYA
14970	int	RRP8 (int) JHDM1D	false	int	RRP8 (int) JHDM1D
14972	int	GALT (int) TRAF5	false	int	GALT (int) TRAF5
14975	int	RASSF2 (int) CXADR	false	int	RASSF2 (int) CXADR
14978	int	DOCK1 (int) POLR2L	false	int	DOCK1 (int) POLR2L
14981	int	KRR1 (int) RECQL	false	int	KRR1 (int) RECQL
14983	int	KRR1 (int) IFT57	false	int	KRR1 (int) IFT57
14986	int	CDC2 (int) SNAPC4	false	int	CDC2 (int) SNAPC4
14988	int	UPP1 (int) HUS1	false	int	UPP1 (int) HUS1
14990	int	THOP1 (int) MITF	false	int	THOP1 (int) MITF
14992	int	THOP1 (int) SLFN12	false	int	THOP1 (int) SLFN12
14994	int	NCRNA00094 (int) FKBP1B	false	int	NCRNA00094 (int) FKBP1B
14996	int	NCRNA00094 (int) ROGDI	false	int	NCRNA00094 (int) ROGDI
14999	int	TLN1 (int) ATN1	false	int	TLN1 (int) ATN1
15001	int	DTYMK (int) MYBL2	false	int	DTYMK (int) MYBL2
15003	int	DTYMK (int) RFC4	false	int	DTYMK (int) RFC4
15005	int	DTYMK (int) RAD51	false	int	DTYMK (int) RAD51
15007	int	DTYMK (int) KDM5B	false	int	DTYMK (int) KDM5B
15010	int	F8A1 (int) SLC25A20	false	int	F8A1 (int) SLC25A20
15012	int	F8A1 (int) NLRX1	false	int	F8A1 (int) NLRX1
15014	int	LMAN1 (int) SSR1	false	int	LMAN1 (int) SSR1
15016	int	LMAN1 (int) GPR176	false	int	LMAN1 (int) GPR176
15018	int	LMAN1 (int) OCRL	false	int	LMAN1 (int) OCRL
15020	int	LMAN1 (int) TOR1AIP1	false	int	LMAN1 (int) TOR1AIP1
15023	int	DMTF1 (int) NEAT1	false	int	DMTF1 (int) NEAT1
15026	int	BAMBI (int) EPHX1	false	int	BAMBI (int) EPHX1
15027	int	BAMBI (int) HEXIM1	false	int	BAMBI (int) HEXIM1
15029	int	BAMBI (int) ENAH	false	int	BAMBI (int) ENAH
15031	int	BAMBI (int) CYBRD1	false	int	BAMBI (int) CYBRD1
15033	int	ARF6 (int) DICER1	false	int	ARF6 (int) DICER1
15035	int	INPP5D (int) GLYR1	false	int	INPP5D (int) GLYR1
15037	int	RBBP8 (int) CTNNBIP1	false	int	RBBP8 (int) CTNNBIP1
15039	int	RBBP8 (int) MYO6	false	int	RBBP8 (int) MYO6
15041	int	RBBP8 (int) DOCK6	false	int	RBBP8 (int) DOCK6
15044	int	ETV5 (int) ACTA2	false	int	ETV5 (int) ACTA2
15046	int	ETV5 (int) FAS	false	int	ETV5 (int) FAS
15048	int	ETV5 (int) SLC4A7	false	int	ETV5 (int) SLC4A7
15051	int	EZH2 (int) NDST1	false	int	EZH2 (int) NDST1
15053	int	EZH2 (int) NQO2	false	int	EZH2 (int) NQO2
15055	int	MYCBP (int) C1orf144	false	int	MYCBP (int) C1orf144
15057	int	MAD2L1 (int) PAICS	false	int	MAD2L1 (int) PAICS
15059	int	MAD2L1 (int) RFC3	false	int	MAD2L1 (int) RFC3
15061	int	HES1 (int) ANGPTL4	false	int	HES1 (int) ANGPTL4
15063	int	ARMCX2 (int) ID2	false	int	ARMCX2 (int) ID2
15065	int	ARMCX2 (int) PLTP	false	int	ARMCX2 (int) PLTP
15067	int	ARMCX2 (int) ITPR2	false	int	ARMCX2 (int) ITPR2
15069	int	ARMCX2 (int) CYBA	false	int	ARMCX2 (int) CYBA
15071	int	ARMCX2 (int) NRGN	false	int	ARMCX2 (int) NRGN
15073	int	ARMCX2 (int) RECK	false	int	ARMCX2 (int) RECK
15075	int	ARMCX2 (int) LRRC6	false	int	ARMCX2 (int) LRRC6
15076	int	ARMCX2 (int) SAT1	false	int	ARMCX2 (int) SAT1
15078	int	ARMCX2 (int) SULF1	false	int	ARMCX2 (int) SULF1
15080	int	ARMCX2 (int) AIM1	false	int	ARMCX2 (int) AIM1
15082	int	ARMCX2 (int) ANKRD28	false	int	ARMCX2 (int) ANKRD28
15083	int	ARMCX2 (int) ARMCX3	false	int	ARMCX2 (int) ARMCX3
15085	int	ARMCX2 (int) DCHS1	false	int	ARMCX2 (int) DCHS1
15088	int	MMD (int) ZNF532	false	int	MMD (int) ZNF532
15091	int	CCNA2 (int) EXOSC2	false	int	CCNA2 (int) EXOSC2
15094	int	RBP1 (int) PCDH17	false	int	RBP1 (int) PCDH17
15096	int	RBP1 (int) CADM1	false	int	RBP1 (int) CADM1
15098	int	RBP1 (int) BCAM	false	int	RBP1 (int) BCAM
15101	int	STC2 (int) TUFT1	false	int	STC2 (int) TUFT1
15103	int	STC2 (int) LDB2	false	int	STC2 (int) LDB2
15106	int	CDH2 (int) PALLD	false	int	CDH2 (int) PALLD
15108	int	CDH2 (int) TGFBI	false	int	CDH2 (int) TGFBI
15109	int	CDH2 (int) CTDSPL	false	int	CDH2 (int) CTDSPL
15111	int	CDH2 (int) EGFR	false	int	CDH2 (int) EGFR
15113	int	CDH2 (int) TPST1	false	int	CDH2 (int) TPST1
15115	int	CDH2 (int) D4S234E	false	int	CDH2 (int) D4S234E
15116	int	CDH2 (int) LYPD1	false	int	CDH2 (int) LYPD1
15118	int	CDH2 (int) LRP12	false	int	CDH2 (int) LRP12
15121	int	MRPL19 (int) KDELC1	false	int	MRPL19 (int) KDELC1
15124	int	TNFRSF1B (int) CIDEB	false	int	TNFRSF1B (int) CIDEB
15126	int	MAP3K3 (int) BAG2	false	int	MAP3K3 (int) BAG2
15128	int	APC (int) PGAP1	false	int	APC (int) PGAP1
15131	int	ZHX2 (int) ORC5L	false	int	ZHX2 (int) ORC5L
15133	int	ZHX2 (int) NFATC1	false	int	ZHX2 (int) NFATC1
15135	int	FEZ1 (int) MXI1	false	int	FEZ1 (int) MXI1
15138	int	FANCG (int) BRCA1	false	int	FANCG (int) BRCA1
15141	int	AGL (int) KIF1B	false	int	AGL (int) KIF1B
15144	int	LOXL1 (int) FSTL3	false	int	LOXL1 (int) FSTL3
15146	int	C10orf116 (int) PCDH9	false	int	C10orf116 (int) PCDH9
15148	int	CSNK2A2 (int) RAB11A	false	int	CSNK2A2 (int) RAB11A
15150	int	ZNF185 (int) PLAT	false	int	ZNF185 (int) PLAT
15151	int	FSTL3 (int) AKR1B1	false	int	FSTL3 (int) AKR1B1
15153	int	TERF2 (int) HNRPDL	false	int	TERF2 (int) HNRPDL
15155	int	TERF2 (int) SLC48A1	false	int	TERF2 (int) SLC48A1
15157	int	SFRS17A (int) LPCAT1	false	int	SFRS17A (int) LPCAT1
15158	int	SFRS17A (int) ARMCX3	false	int	SFRS17A (int) ARMCX3
15160	int	SFRS17A (int) AKAP8L	false	int	SFRS17A (int) AKAP8L
15162	int	SFRS17A (int) ARHGAP24	false	int	SFRS17A (int) ARHGAP24
15165	int	SKP2 (int) DNASE2	false	int	SKP2 (int) DNASE2
15167	int	GPRC5B (int) IQCK	false	int	GPRC5B (int) IQCK
15169	int	GPRC5B (int) PDP1	false	int	GPRC5B (int) PDP1
15172	int	MON1B (int) TNS3	false	int	MON1B (int) TNS3
15175	int	MAP3K11 (int) CBFB	false	int	MAP3K11 (int) CBFB
15178	int	CTSF (int) MIPEP	false	int	CTSF (int) MIPEP
15181	int	TMOD1 (int) SDC1	false	int	TMOD1 (int) SDC1
15183	int	TMOD1 (int) ABAT	false	int	TMOD1 (int) ABAT
15185	int	TMOD1 (int) LEPR	false	int	TMOD1 (int) LEPR
15188	int	NUCB2 (int) HSP90B1	false	int	NUCB2 (int) HSP90B1
15189	int	NUCB2 (int) MAGT1	false	int	NUCB2 (int) MAGT1
15192	int	RFC2 (int) POLA2	false	int	RFC2 (int) POLA2
15194	int	RFC2 (int) LMBR1L	false	int	RFC2 (int) LMBR1L
15197	int	PDE4B (int) SNRK	false	int	PDE4B (int) SNRK
15200	int	KIAA0020 (int) PNO1	false	int	KIAA0020 (int) PNO1
15202	int	PNPLA6 (int) TIE1	false	int	PNPLA6 (int) TIE1
15204	int	PNPLA6 (int) TRA2A	false	int	PNPLA6 (int) TRA2A
15206	int	PNPLA6 (int) SEC22B	false	int	PNPLA6 (int) SEC22B
15208	int	PNPLA6 (int) FAM176B	false	int	PNPLA6 (int) FAM176B
15211	int	ITPKB (int) ATP2B4	false	int	ITPKB (int) ATP2B4
15213	int	HMGB3 (int) CHPF2	false	int	HMGB3 (int) CHPF2
15215	int	BUB1B (int) CDC2	false	int	BUB1B (int) CDC2
15217	int	BUB1B (int) SHCBP1	false	int	BUB1B (int) SHCBP1
15219	int	BUB1B (int) KIF18B	false	int	BUB1B (int) KIF18B
15222	int	DLGAP5 (int) ORC2L	false	int	DLGAP5 (int) ORC2L
15224	int	DLGAP5 (int) KIF20A	false	int	DLGAP5 (int) KIF20A
15226	int	DLGAP5 (int) MNS1	false	int	DLGAP5 (int) MNS1
15228	int	DLGAP5 (int) ANP32E	false	int	DLGAP5 (int) ANP32E
15230	int	GCA (int) GIPC2	false	int	GCA (int) GIPC2
15232	int	MTR (int) GRB10	false	int	MTR (int) GRB10
15234	int	POLRMT (int) TTLL12	false	int	POLRMT (int) TTLL12
15237	int	SEMA3C (int) CFDP1	false	int	SEMA3C (int) CFDP1
15238	int	SEMA3C (int) CDH2	false	int	SEMA3C (int) CDH2
15240	int	SEMA3C (int) BST1	false	int	SEMA3C (int) BST1
15242	int	SEMA3C (int) HYI	false	int	SEMA3C (int) HYI
15244	int	CD302 (int) IMPA2	false	int	CD302 (int) IMPA2
15246	int	CD302 (int) FAT4	false	int	CD302 (int) FAT4
15249	int	DNAJB4 (int) PIK3CD	false	int	DNAJB4 (int) PIK3CD
15251	int	DNAJB4 (int) NKX3-1	false	int	DNAJB4 (int) NKX3-1
15253	int	DNAJB4 (int) LARP6	false	int	DNAJB4 (int) LARP6
15256	int	HBEGF (int) CD9	false	int	HBEGF (int) CD9
15258	int	HBEGF (int) HIVEP2	false	int	HBEGF (int) HIVEP2
15260	int	HBEGF (int) SMURF1	false	int	HBEGF (int) SMURF1
15263	int	RGS3 (int) PDGFB	false	int	RGS3 (int) PDGFB
15266	int	WIPI1 (int) PHLDA1	false	int	WIPI1 (int) PHLDA1
15268	int	IL32 (int) CTSS	false	int	IL32 (int) CTSS
15270	int	IL32 (int) MMP10	false	int	IL32 (int) MMP10
15273	int	MAP3K5 (int) NOS3	false	int	MAP3K5 (int) NOS3
15276	int	VRK1 (int) TOPBP1	false	int	VRK1 (int) TOPBP1
15278	int	PDIA5 (int) SCPEP1	false	int	PDIA5 (int) SCPEP1
15281	int	PALM (int) HEPH	false	int	PALM (int) HEPH
15283	int	ADARB1 (int) TCFL5	false	int	ADARB1 (int) TCFL5
15285	int	ADARB1 (int) TBC1D2B	false	int	ADARB1 (int) TBC1D2B
15287	int	ADARB1 (int) RCBTB1	false	int	ADARB1 (int) RCBTB1
15289	int	ADARB1 (int) RRP15	false	int	ADARB1 (int) RRP15
15291	int	ADARB1 (int) DENND1A	false	int	ADARB1 (int) DENND1A
15293	int	PIK3CD (int) NEDD9	false	int	PIK3CD (int) NEDD9
15295	int	PIK3CD (int) IDS	false	int	PIK3CD (int) IDS
15298	int	FBLN2 (int) RP11-138L21.1	false	int	FBLN2 (int) RP11-138L21.1
15301	int	DAPK3 (int) TBC1D9	false	int	DAPK3 (int) TBC1D9
15303	int	DAPK3 (int) PHF17	false	int	DAPK3 (int) PHF17
15305	int	DNASE1L1 (int) ASRGL1	false	int	DNASE1L1 (int) ASRGL1
15308	int	PCDH1 (int) KIAA0247	false	int	PCDH1 (int) KIAA0247
15310	int	PCDH1 (int) COL4A2	false	int	PCDH1 (int) COL4A2
15312	int	TCEA2 (int) PINK1	false	int	TCEA2 (int) PINK1
15314	int	TCEA2 (int) ICA1	false	int	TCEA2 (int) ICA1
15316	int	KDR (int) DPYSL2	false	int	KDR (int) DPYSL2
15318	int	KDR (int) PODXL	false	int	KDR (int) PODXL
15319	int	KDR (int) JAK1	false	int	KDR (int) JAK1
15321	int	KDR (int) PFKFB3	false	int	KDR (int) PFKFB3
15323	int	KDR (int) GNG11	false	int	KDR (int) GNG11
15325	int	KDR (int) PRRG1	false	int	KDR (int) PRRG1
15327	int	KDR (int) COL18A1	false	int	KDR (int) COL18A1
15329	int	VASH1 (int) CHST15	false	int	VASH1 (int) CHST15
15331	int	VASH1 (int) UGDH	false	int	VASH1 (int) UGDH
15333	int	VASH1 (int) NID2	false	int	VASH1 (int) NID2
15335	int	VASH1 (int) MGST2	false	int	VASH1 (int) MGST2
15336	int	VASH1 (int) CORO2B	false	int	VASH1 (int) CORO2B
15338	int	VASH1 (int) PLCB1	false	int	VASH1 (int) PLCB1
15340	int	VASH1 (int) BMPR1A	false	int	VASH1 (int) BMPR1A
15342	int	VASH1 (int) CSGALNACT1	false	int	VASH1 (int) CSGALNACT1
15344	int	VASH1 (int) PPM1F	false	int	VASH1 (int) PPM1F
15347	int	CSTF3 (int) GIT2	false	int	CSTF3 (int) GIT2
15349	int	CDC6 (int) SNX5	false	int	CDC6 (int) SNX5
15350	int	CDC6 (int) ATAD2	false	int	CDC6 (int) ATAD2
15352	int	CDC6 (int) MIS12	false	int	CDC6 (int) MIS12
15354	int	CEBPD (int) IER3	false	int	CEBPD (int) IER3
15356	int	CEBPD (int) TNFAIP2	false	int	CEBPD (int) TNFAIP2
15358	int	CEBPD (int) SELL	false	int	CEBPD (int) SELL
15360	int	CEBPD (int) FNBP1	false	int	CEBPD (int) FNBP1
15363	int	HDHD1A (int) ECHDC3	false	int	HDHD1A (int) ECHDC3
15366	int	CHAF1A (int) TRIM2	false	int	CHAF1A (int) TRIM2
15368	int	FABP4 (int) PTPRE	false	int	FABP4 (int) PTPRE
15371	int	KDELR3 (int) PCBP2	false	int	KDELR3 (int) PCBP2
15373	int	RFC4 (int) NPM3	false	int	RFC4 (int) NPM3
15375	int	RFC4 (int) ATIC	false	int	RFC4 (int) ATIC
15377	int	RFC4 (int) DSCC1	false	int	RFC4 (int) DSCC1
15380	int	ZWINT (int) HEXA	false	int	ZWINT (int) HEXA
15382	int	TRIP13 (int) FANCG	false	int	TRIP13 (int) FANCG
15384	int	TRIP13 (int) HNRNPH3	false	int	TRIP13 (int) HNRNPH3
15386	int	TRIP13 (int) OIP5	false	int	TRIP13 (int) OIP5
15388	int	TRIP13 (int) PDSS1	false	int	TRIP13 (int) PDSS1
15389	int	RARRES3 (int) PSMB10	false	int	RARRES3 (int) PSMB10
15391	int	RARRES3 (int) ENPP1	false	int	RARRES3 (int) ENPP1
15394	int	CLN5 (int) ERLIN2	false	int	CLN5 (int) ERLIN2
15395	int	CLN5 (int) C3orf64	false	int	CLN5 (int) C3orf64
15398	int	P2RX4 (int) PTX3	false	int	P2RX4 (int) PTX3
15401	int	MAP3K4 (int) UBTF	false	int	MAP3K4 (int) UBTF
15404	int	NRCAM (int) TPD52	false	int	NRCAM (int) TPD52
15406	int	NID2 (int) TOX	false	int	NID2 (int) TOX
15408	int	NID2 (int) PLCL1	false	int	NID2 (int) PLCL1
15410	int	NID2 (int) SMAD1	false	int	NID2 (int) SMAD1
15412	int	NID2 (int) CAMK2N1	false	int	NID2 (int) CAMK2N1
15413	int	GNG11 (int) ADD3	false	int	GNG11 (int) ADD3
15414	int	GNG11 (int) FABP5	false	int	GNG11 (int) FABP5
15415	int	GNG11 (int) PDE4B	false	int	GNG11 (int) PDE4B
15417	int	GNG11 (int) TNFSF4	false	int	GNG11 (int) TNFSF4
15419	int	GNG11 (int) TFPI2	false	int	GNG11 (int) TFPI2
15422	int	CDC45L (int) MCM7	false	int	CDC45L (int) MCM7
15423	int	CDC45L (int) MCM5	false	int	CDC45L (int) MCM5
15425	int	CDC45L (int) GINS2	false	int	CDC45L (int) GINS2
15426	int	RFC3 (int) TRA2B	false	int	RFC3 (int) TRA2B
15428	int	RFC3 (int) PIP5K1C	false	int	RFC3 (int) PIP5K1C
15430	int	RFC3 (int) CDCA4	false	int	RFC3 (int) CDCA4
15432	int	PDE2A (int) DLG1	false	int	PDE2A (int) DLG1
15434	int	PDE2A (int) DUSP4	false	int	PDE2A (int) DUSP4
15436	int	PDE2A (int) STC1	false	int	PDE2A (int) STC1
15438	int	PDE2A (int) CCDC69	false	int	PDE2A (int) CCDC69
15440	int	PDE2A (int) TMEM51	false	int	PDE2A (int) TMEM51
15443	int	GPR137B (int) TSPAN31	false	int	GPR137B (int) TSPAN31
15446	int	TUBB2A (int) CUL4B	false	int	TUBB2A (int) CUL4B
15448	int	TUBB2A (int) ZNF274	false	int	TUBB2A (int) ZNF274
15450	int	TUBB2A (int) CCNA1	false	int	TUBB2A (int) CCNA1
15452	int	TUBB2A (int) SIL1	false	int	TUBB2A (int) SIL1
15454	int	RAD51AP1 (int) USP1	false	int	RAD51AP1 (int) USP1
15456	int	RAD51AP1 (int) KIAA0101	false	int	RAD51AP1 (int) KIAA0101
15458	int	RAD51AP1 (int) PRPS2	false	int	RAD51AP1 (int) PRPS2
15459	int	RAD51AP1 (int) BRCA1	false	int	RAD51AP1 (int) BRCA1
15461	int	RAD51AP1 (int) BMP1	false	int	RAD51AP1 (int) BMP1
15463	int	RAD51AP1 (int) LHFPL2	false	int	RAD51AP1 (int) LHFPL2
15465	int	RAD51AP1 (int) MYBL1	false	int	RAD51AP1 (int) MYBL1
15468	int	MFNG (int) NFIB	false	int	MFNG (int) NFIB
15469	int	NDC80 (int) TOP2A	false	int	NDC80 (int) TOP2A
15470	int	NDC80 (int) SMC4	false	int	NDC80 (int) SMC4
15471	int	NDC80 (int) MCM6	false	int	NDC80 (int) MCM6
15472	int	NDC80 (int) MAD2L1	false	int	NDC80 (int) MAD2L1
15473	int	NDC80 (int) CCNA2	false	int	NDC80 (int) CCNA2
15475	int	NDC80 (int) TMPO	false	int	NDC80 (int) TMPO
15477	int	NDC80 (int) CDKN2C	false	int	NDC80 (int) CDKN2C
15479	int	NDC80 (int) KIF11	false	int	NDC80 (int) KIF11
15481	int	NDC80 (int) HIRIP3	false	int	NDC80 (int) HIRIP3
15483	int	NDC80 (int) MCM4	false	int	NDC80 (int) MCM4
15485	int	NDC80 (int) NCAPH	false	int	NDC80 (int) NCAPH
15487	int	NDC80 (int) KIF15	false	int	NDC80 (int) KIF15
15489	int	MGST2 (int) KIAA0040	false	int	MGST2 (int) KIAA0040
15491	int	MGST2 (int) SLC7A7	false	int	MGST2 (int) SLC7A7
15494	int	CKS2 (int) HYAL2	false	int	CKS2 (int) HYAL2
15496	int	CKS2 (int) RAD51C	false	int	CKS2 (int) RAD51C
15498	int	CKS2 (int) CACYBP	false	int	CKS2 (int) CACYBP
15500	int	PPID (int) PIGF	false	int	PPID (int) PIGF
15502	int	PPID (int) RPAP3	false	int	PPID (int) RPAP3
15504	int	PPID (int) SLC30A5	false	int	PPID (int) SLC30A5
15507	int	GMFG (int) ALCAM	false	int	GMFG (int) ALCAM
15508	int	GMFG (int) MYLK	false	int	GMFG (int) MYLK
15510	int	GMFG (int) LYN	false	int	GMFG (int) LYN
15511	int	GMFG (int) SEMA3C	false	int	GMFG (int) SEMA3C
15513	int	GMFG (int) CLEC1A	false	int	GMFG (int) CLEC1A
15515	int	GMFG (int) ZFPM2	false	int	GMFG (int) ZFPM2
15517	int	GMFG (int) PHF11	false	int	GMFG (int) PHF11
15520	int	SMC2 (int) CHEK1	false	int	SMC2 (int) CHEK1
15522	int	SMC2 (int) EBP	false	int	SMC2 (int) EBP
15525	int	DBF4 (int) NUPL1	false	int	DBF4 (int) NUPL1
15527	int	DBF4 (int) PPP2R5B	false	int	DBF4 (int) PPP2R5B
15529	int	DBF4 (int) RMI1	false	int	DBF4 (int) RMI1
15531	int	DBF4 (int) TTC4	false	int	DBF4 (int) TTC4
15534	int	LMO2 (int) RGS4	false	int	LMO2 (int) RGS4
15536	int	LMO2 (int) GGT5	false	int	LMO2 (int) GGT5
15538	int	LMO2 (int) IL3RA	false	int	LMO2 (int) IL3RA
15540	int	LMO2 (int) SEMA3A	false	int	LMO2 (int) SEMA3A
15542	int	LMO2 (int) ENTPD1	false	int	LMO2 (int) ENTPD1
15544	int	LMO2 (int) NRIP3	false	int	LMO2 (int) NRIP3
15547	int	FADS3 (int) MLXIP	false	int	FADS3 (int) MLXIP
15548	int	FADS3 (int) MAP3K5	false	int	FADS3 (int) MAP3K5
15550	int	FADS3 (int) ZNF193	false	int	FADS3 (int) ZNF193
15553	int	CPT2 (int) TRIM68	false	int	CPT2 (int) TRIM68
15556	int	EDNRB (int) CPS1	false	int	EDNRB (int) CPS1
15559	int	PSMB9 (int) CASP1	false	int	PSMB9 (int) CASP1
15561	int	PSMB9 (int) ACSL5	false	int	PSMB9 (int) ACSL5
15563	int	PSMB9 (int) DDX60	false	int	PSMB9 (int) DDX60
15566	int	PMAIP1 (int) ZNF419	false	int	PMAIP1 (int) ZNF419
15569	int	TECPR2 (int) CUX1	false	int	TECPR2 (int) CUX1
15570	int	TECPR2 (int) PHKB	false	int	TECPR2 (int) PHKB
15572	int	TECPR2 (int) RIN3	false	int	TECPR2 (int) RIN3
15575	int	CREB1 (int) GSR	false	int	CREB1 (int) GSR
15577	int	CREB1 (int) UBE4B	false	int	CREB1 (int) UBE4B
15579	int	GTSE1 (int) RNASEH2A	false	int	GTSE1 (int) RNASEH2A
15580	int	GTSE1 (int) MCM5	false	int	GTSE1 (int) MCM5
15582	int	GTSE1 (int) TACC3	false	int	GTSE1 (int) TACC3
15584	int	GTSE1 (int) SUV39H1	false	int	GTSE1 (int) SUV39H1
15586	int	GTSE1 (int) CDK5RAP2	false	int	GTSE1 (int) CDK5RAP2
15588	int	GTSE1 (int) ITFG1	false	int	GTSE1 (int) ITFG1
15591	int	TMC6 (int) SYNGR2	false	int	TMC6 (int) SYNGR2
15593	int	RGS4 (int) RGS5	false	int	RGS4 (int) RGS5
15595	int	SEC23A (int) CALU	false	int	SEC23A (int) CALU
15597	int	SEC23A (int) NMD3	false	int	SEC23A (int) NMD3
15600	int	POT1 (int) FLNC	false	int	POT1 (int) FLNC
15602	int	POT1 (int) ADH5	false	int	POT1 (int) ADH5
15604	int	POT1 (int) PRIM2	false	int	POT1 (int) PRIM2
15605	int	FLRT2 (int) SLC4A7	false	int	FLRT2 (int) SLC4A7
15607	int	FLRT2 (int) C16orf5	false	int	FLRT2 (int) C16orf5
15609	int	EIF1AY (int) DDX3Y	false	int	EIF1AY (int) DDX3Y
15611	int	EIF1AY (int) KDM5D	false	int	EIF1AY (int) KDM5D
15614	int	IFI6 (int) MX1	false	int	IFI6 (int) MX1
15616	int	IFI6 (int) INPP4B	false	int	IFI6 (int) INPP4B
15618	int	IFI6 (int) ISG15	false	int	IFI6 (int) ISG15
15619	int	IFI6 (int) IFIH1	false	int	IFI6 (int) IFIH1
15621	int	FOSL1 (int) CDC42EP2	false	int	FOSL1 (int) CDC42EP2
15624	int	TMED2 (int) KIAA0100	false	int	TMED2 (int) KIAA0100
15625	int	TMED2 (int) SLC16A1	false	int	TMED2 (int) SLC16A1
15626	int	TMED2 (int) LMAN1	false	int	TMED2 (int) LMAN1
15627	int	TMED2 (int) SEC23A	false	int	TMED2 (int) SEC23A
15629	int	TMED2 (int) DEGS1	false	int	TMED2 (int) DEGS1
15631	int	TMED2 (int) PTK2	false	int	TMED2 (int) PTK2
15633	int	TMED2 (int) SNAP23	false	int	TMED2 (int) SNAP23
15635	int	TMED2 (int) PPFIA1	false	int	TMED2 (int) PPFIA1
15637	int	TMED2 (int) LOC100272216	false	int	TMED2 (int) LOC100272216
15638	int	TMED2 (int) CDV3	false	int	TMED2 (int) CDV3
15640	int	TMED2 (int) SELT	false	int	TMED2 (int) SELT
15643	int	LCAT (int) ZNF264	false	int	LCAT (int) ZNF264
15645	int	LCAT (int) ABCC5	false	int	LCAT (int) ABCC5
15647	int	LCAT (int) VAMP1	false	int	LCAT (int) VAMP1
15649	int	LCAT (int) CRKRS	false	int	LCAT (int) CRKRS
15651	int	LCAT (int) ZNF337	false	int	LCAT (int) ZNF337
15653	int	LCAT (int) TSPYL2	false	int	LCAT (int) TSPYL2
15655	int	LCAT (int) ZNF432	false	int	LCAT (int) ZNF432
15656	int	KIF11 (int) TRIP13	false	int	KIF11 (int) TRIP13
15658	int	KIF11 (int) PXDN	false	int	KIF11 (int) PXDN
15660	int	KIF11 (int) DNAJC9	false	int	KIF11 (int) DNAJC9
15662	int	KIF11 (int) CEP55	false	int	KIF11 (int) CEP55
15664	int	KIF11 (int) C1orf135	false	int	KIF11 (int) C1orf135
15667	int	RAD1 (int) PHLDB1	false	int	RAD1 (int) PHLDB1
15669	int	TIE1 (int) NOTCH1	false	int	TIE1 (int) NOTCH1
15672	int	CXCL1 (int) CXCL6	false	int	CXCL1 (int) CXCL6
15674	int	CXCL1 (int) CXCL2	false	int	CXCL1 (int) CXCL2
15676	int	MMP1 (int) MMP10	false	int	MMP1 (int) MMP10
15679	int	CLDN5 (int) CD93	false	int	CLDN5 (int) CD93
15682	int	PIK3C2B (int) GJA4	false	int	PIK3C2B (int) GJA4
15684	int	PIK3C2B (int) CHST7	false	int	PIK3C2B (int) CHST7
15686	int	PIK3C2B (int) ZCCHC2	false	int	PIK3C2B (int) ZCCHC2
15688	int	PIK3C2B (int) PPARD	false	int	PIK3C2B (int) PPARD
15691	int	C15orf39 (int) SERPINB9	false	int	C15orf39 (int) SERPINB9
15692	int	C15orf39 (int) CDC42EP2	false	int	C15orf39 (int) CDC42EP2
15694	int	C15orf39 (int) KLF2	false	int	C15orf39 (int) KLF2
15696	int	C15orf39 (int) KLF13	false	int	C15orf39 (int) KLF13
15698	int	EPB49 (int) CREG1	false	int	EPB49 (int) CREG1
15700	int	TBC1D8 (int) PPP2R3A	false	int	TBC1D8 (int) PPP2R3A
15702	int	MYO5A (int) FBLN2	false	int	MYO5A (int) FBLN2
15704	int	MYO5A (int) CSRP2	false	int	MYO5A (int) CSRP2
15706	int	MYO5A (int) TUSC3	false	int	MYO5A (int) TUSC3
15708	int	MYO5A (int) GABBR2	false	int	MYO5A (int) GABBR2
15710	int	MYO5A (int) RORA	false	int	MYO5A (int) RORA
15711	int	TOX (int) GMFG	false	int	TOX (int) GMFG
15713	int	TOX (int) PTGIR	false	int	TOX (int) PTGIR
15715	int	TOX (int) RANGAP1	false	int	TOX (int) RANGAP1
15717	int	TOX (int) TP53I11	false	int	TOX (int) TP53I11
15719	int	TOX (int) C21orf7	false	int	TOX (int) C21orf7
15722	int	REST (int) MED4	false	int	REST (int) MED4
15724	int	REST (int) KRIT1	false	int	REST (int) KRIT1
15727	int	FKBP5 (int) ATF5	false	int	FKBP5 (int) ATF5
15729	int	FKBP5 (int) SMCHD1	false	int	FKBP5 (int) SMCHD1
15731	int	FKBP5 (int) CCDC88A	false	int	FKBP5 (int) CCDC88A
15733	int	SELL (int) F5	false	int	SELL (int) F5
15735	int	SELL (int) SELP	false	int	SELL (int) SELP
15736	int	SELL (int) LEPR	false	int	SELL (int) LEPR
15738	int	PPM1D (int) MYST2	false	int	PPM1D (int) MYST2
15740	int	ABCG1 (int) ABCA1	false	int	ABCG1 (int) ABCA1
15743	int	SMCR7L (int) METTL13	false	int	SMCR7L (int) METTL13
15745	int	SMCR7L (int) C1orf50	false	int	SMCR7L (int) C1orf50
15747	int	STC1 (int) MAP4K4	false	int	STC1 (int) MAP4K4
15749	int	EXO1 (int) CDC6	false	int	EXO1 (int) CDC6
15751	int	EXO1 (int) WDR76	false	int	EXO1 (int) WDR76
15753	int	ACD (int) MTIF2	false	int	ACD (int) MTIF2
15755	int	VCAN (int) PTK7	false	int	VCAN (int) PTK7
15757	int	S1PR1 (int) FZD2	false	int	S1PR1 (int) FZD2
15760	int	TROAP (int) CDC25B	false	int	TROAP (int) CDC25B
15762	int	TROAP (int) KIF2C	false	int	TROAP (int) KIF2C
15765	int	TFAP2A (int) KAL1	false	int	TFAP2A (int) KAL1
15767	int	TFAP2A (int) CDH11	false	int	TFAP2A (int) CDH11
15769	int	TFAP2A (int) CFH	false	int	TFAP2A (int) CFH
15771	int	TFAP2A (int) SPATA7	false	int	TFAP2A (int) SPATA7
15773	int	RNF24 (int) EIF1AY	false	int	RNF24 (int) EIF1AY
15775	int	RNF24 (int) VAMP2	false	int	RNF24 (int) VAMP2
15778	int	KCNK1 (int) SNAPC1	false	int	KCNK1 (int) SNAPC1
15781	int	RAPGEF5 (int) PTGER4	false	int	RAPGEF5 (int) PTGER4
15783	int	RAPGEF5 (int) PPAP2B	false	int	RAPGEF5 (int) PPAP2B
15786	int	LTBP2 (int) HRASLS	false	int	LTBP2 (int) HRASLS
15788	int	SGCE (int) PEG10	false	int	SGCE (int) PEG10
15790	int	CDC25A (int) SKP2	false	int	CDC25A (int) SKP2
15792	int	CDC25A (int) KLF7	false	int	CDC25A (int) KLF7
15794	int	CDC25A (int) GINS1	false	int	CDC25A (int) GINS1
15797	int	KIF23 (int) STIL	false	int	KIF23 (int) STIL
15798	int	KIF23 (int) ECT2	false	int	KIF23 (int) ECT2
15800	int	F5 (int) TPD52L1	false	int	F5 (int) TPD52L1
15803	int	NCK1 (int) PDE3A	false	int	NCK1 (int) PDE3A
15805	int	NCK1 (int) MALT1	false	int	NCK1 (int) MALT1
15807	int	STX1A (int) CENPT	false	int	STX1A (int) CENPT
15810	int	TGFBR3 (int) LRRC16A	false	int	TGFBR3 (int) LRRC16A
15813	int	PTGS2 (int) PLA2G4A	false	int	PTGS2 (int) PLA2G4A
15815	int	PTGS2 (int) ZNF238	false	int	PTGS2 (int) ZNF238
15817	int	PTGS2 (int) YRDC	false	int	PTGS2 (int) YRDC
15819	int	PTGS2 (int) NR1D1	false	int	PTGS2 (int) NR1D1
15821	int	FEN1 (int) CDC25A	false	int	FEN1 (int) CDC25A
15823	int	FEN1 (int) HELLS	false	int	FEN1 (int) HELLS
15824	int	FAS (int) ACTA2	false	int	FAS (int) ACTA2
15827	int	NR2C1 (int) PIK3R4	false	int	NR2C1 (int) PIK3R4
15829	int	NR2C1 (int) ISOC2	false	int	NR2C1 (int) ISOC2
15832	int	H1FX (int) P4HA1	false	int	H1FX (int) P4HA1
15834	int	H1FX (int) HIST1H1C	false	int	H1FX (int) HIST1H1C
15836	int	TTK (int) GLB1	false	int	TTK (int) GLB1
15839	int	NAV3 (int) ZFP36L2	false	int	NAV3 (int) ZFP36L2
15841	int	NAV3 (int) BCL2A1	false	int	NAV3 (int) BCL2A1
15843	int	NAV3 (int) TNFSF9	false	int	NAV3 (int) TNFSF9
15845	int	NAV3 (int) MTUS1	false	int	NAV3 (int) MTUS1
15847	int	NAV3 (int) SOX18	false	int	NAV3 (int) SOX18
15849	int	MELK (int) SPAG5	false	int	MELK (int) SPAG5
15851	int	MELK (int) ITGB3BP	false	int	MELK (int) ITGB3BP
15852	int	MELK (int) TNIP1	false	int	MELK (int) TNIP1
15854	int	MELK (int) SKA1	false	int	MELK (int) SKA1
15856	int	MELK (int) NCAPG2	false	int	MELK (int) NCAPG2
15858	int	MELK (int) ATP5O	false	int	MELK (int) ATP5O
15860	int	POLA1 (int) MAGED2	false	int	POLA1 (int) MAGED2
15863	int	POP5 (int) FARS2	false	int	POP5 (int) FARS2
15865	int	POP5 (int) ODF2	false	int	POP5 (int) ODF2
15867	int	POP5 (int) C17orf68	false	int	POP5 (int) C17orf68
15870	int	ZBTB11 (int) MPHOSPH8	false	int	ZBTB11 (int) MPHOSPH8
15872	int	ORC2L (int) ACACA	false	int	ORC2L (int) ACACA
15874	int	NME3 (int) TGIF1	false	int	NME3 (int) TGIF1
15876	int	NME3 (int) TMEM47	false	int	NME3 (int) TMEM47
15879	int	GCHFR (int) ROBO1	false	int	GCHFR (int) ROBO1
15881	int	GCHFR (int) SLC35F2	false	int	GCHFR (int) SLC35F2
15883	int	PLK4 (int) CDK2	false	int	PLK4 (int) CDK2
15885	int	PLK4 (int) CGGBP1	false	int	PLK4 (int) CGGBP1
15887	int	PLK4 (int) GRINA	false	int	PLK4 (int) GRINA
15888	int	PLK4 (int) SPCS3	false	int	PLK4 (int) SPCS3
15890	int	PLK4 (int) CEP76	false	int	PLK4 (int) CEP76
15893	int	SAP30 (int) LMO4	false	int	SAP30 (int) LMO4
15895	int	SAP30 (int) PLA2G4C	false	int	SAP30 (int) PLA2G4C
15897	int	SAP30 (int) PIK3IP1	false	int	SAP30 (int) PIK3IP1
15900	int	VAMP5 (int) C18orf10	false	int	VAMP5 (int) C18orf10
15902	int	VAMP5 (int) PIP4K2C	false	int	VAMP5 (int) PIP4K2C
15904	int	ICAM3 (int) RANBP2	false	int	ICAM3 (int) RANBP2
15906	int	ORC5L (int) SQSTM1	false	int	ORC5L (int) SQSTM1
15907	int	CENPA (int) CKS1B	false	int	CENPA (int) CKS1B
15908	int	CENPA (int) RGS3	false	int	CENPA (int) RGS3
15909	int	CENPA (int) CDC45L	false	int	CENPA (int) CDC45L
15911	int	CENPA (int) S100A2	false	int	CENPA (int) S100A2
15913	int	CENPA (int) HMGB2	false	int	CENPA (int) HMGB2
15914	int	CENPA (int) OIP5	false	int	CENPA (int) OIP5
15916	int	CENPA (int) C13orf34	false	int	CENPA (int) C13orf34
15919	int	SHROOM2 (int) NRG1	false	int	SHROOM2 (int) NRG1
15921	int	SHROOM2 (int) CASP7	false	int	SHROOM2 (int) CASP7
15923	int	SHROOM2 (int) PIR	false	int	SHROOM2 (int) PIR
15925	int	SHROOM2 (int) KLF5	false	int	SHROOM2 (int) KLF5
15927	int	SHROOM2 (int) TRIM34	false	int	SHROOM2 (int) TRIM34
15929	int	MAFG (int) SLC2A3	false	int	MAFG (int) SLC2A3
15930	int	MAFG (int) FAM164A	false	int	MAFG (int) FAM164A
15932	int	MAFG (int) MOSPD2	false	int	MAFG (int) MOSPD2
15935	int	OAS2 (int) IFIT3	false	int	OAS2 (int) IFIT3
15938	int	ITGB4 (int) NOL12	false	int	ITGB4 (int) NOL12
15940	int	ITGB4 (int) LIMS2	false	int	ITGB4 (int) LIMS2
15942	int	DDX3Y (int) XIST	false	int	DDX3Y (int) XIST
15945	int	AHDC1 (int) KIAA0649	false	int	AHDC1 (int) KIAA0649
15947	int	AHDC1 (int) POR	false	int	AHDC1 (int) POR
15949	int	AHDC1 (int) OBSL1	false	int	AHDC1 (int) OBSL1
15951	int	AHDC1 (int) INSR	false	int	AHDC1 (int) INSR
15953	int	AHDC1 (int) GPR161	false	int	AHDC1 (int) GPR161
15955	int	AHDC1 (int) PRKD2	false	int	AHDC1 (int) PRKD2
15957	int	DOCK4 (int) TACC2	false	int	DOCK4 (int) TACC2
15959	int	DOCK4 (int) MID1	false	int	DOCK4 (int) MID1
15961	int	DOCK4 (int) NRP1	false	int	DOCK4 (int) NRP1
15963	int	DOCK4 (int) MGAT4A	false	int	DOCK4 (int) MGAT4A
15966	int	NMT2 (int) UGGT1	false	int	NMT2 (int) UGGT1
15969	int	ADORA2A (int) SAMSN1	false	int	ADORA2A (int) SAMSN1
15971	int	MBNL2 (int) PTP4A1	false	int	MBNL2 (int) PTP4A1
15972	int	MBNL2 (int) SNAP23	false	int	MBNL2 (int) SNAP23
15974	int	MBNL2 (int) MYCT1	false	int	MBNL2 (int) MYCT1
15976	int	MBNL2 (int) RAB23	false	int	MBNL2 (int) RAB23
15978	int	MBNL2 (int) SCYL2	false	int	MBNL2 (int) SCYL2
15980	int	RAD51 (int) MDC1	false	int	RAD51 (int) MDC1
15982	int	RAD51 (int) FANCA	false	int	RAD51 (int) FANCA
15984	int	RAD51 (int) PKMYT1	false	int	RAD51 (int) PKMYT1
15986	int	RAD51 (int) PSMC3IP	false	int	RAD51 (int) PSMC3IP
15989	int	CCNE2 (int) GINS3	false	int	CCNE2 (int) GINS3
15991	int	CENPE (int) SPAG5	false	int	CENPE (int) SPAG5
15992	int	CENPE (int) MELK	false	int	CENPE (int) MELK
15994	int	CENPE (int) DNAJC4	false	int	CENPE (int) DNAJC4
15996	int	CENPE (int) NUP205	false	int	CENPE (int) NUP205
15998	int	CENPE (int) NUP107	false	int	CENPE (int) NUP107
16000	int	ASNS (int) MTHFD2	false	int	ASNS (int) MTHFD2
16001	int	ASNS (int) PCK2	false	int	ASNS (int) PCK2
16003	int	ASNS (int) DEAF1	false	int	ASNS (int) DEAF1
16005	int	ASNS (int) CTH	false	int	ASNS (int) CTH
16007	int	ASNS (int) STYK1	false	int	ASNS (int) STYK1
16009	int	PRIM1 (int) RAD51AP1	false	int	PRIM1 (int) RAD51AP1
16011	int	PRIM1 (int) POLE2	false	int	PRIM1 (int) POLE2
16013	int	PRIM1 (int) TIPIN	false	int	PRIM1 (int) TIPIN
16015	int	PRIM1 (int) DCLRE1C	false	int	PRIM1 (int) DCLRE1C
16017	int	PRIM1 (int) MARK4	false	int	PRIM1 (int) MARK4
16019	int	IDUA (int) PTDSS2	false	int	IDUA (int) PTDSS2
16022	int	ARHGAP26 (int) HERC6	false	int	ARHGAP26 (int) HERC6
16023	int	ING3 (int) GFPT1	false	int	ING3 (int) GFPT1
16025	int	PEX12 (int) CPT2	false	int	PEX12 (int) CPT2
16028	int	EFNA4 (int) EPHB2	false	int	EFNA4 (int) EPHB2
16031	int	PTGS1 (int) AP1S2	false	int	PTGS1 (int) AP1S2
16033	int	PTGS1 (int) SOCS2	false	int	PTGS1 (int) SOCS2
16035	int	PTGS1 (int) HMGA2	false	int	PTGS1 (int) HMGA2
16037	int	PTGS1 (int) MICAL2	false	int	PTGS1 (int) MICAL2
16039	int	PTGS1 (int) SMYD2	false	int	PTGS1 (int) SMYD2
16041	int	PTGS1 (int) MBOAT2	false	int	PTGS1 (int) MBOAT2
16043	int	PTGS1 (int) ENOX1	false	int	PTGS1 (int) ENOX1
16046	int	CDC25C (int) FANCI	false	int	CDC25C (int) FANCI
16048	int	RBBP6 (int) SNHG3	false	int	RBBP6 (int) SNHG3
16050	int	PLS1 (int) STK17A	false	int	PLS1 (int) STK17A
16052	int	PLS1 (int) PECI	false	int	PLS1 (int) PECI
16054	int	PLS1 (int) C11orf71	false	int	PLS1 (int) C11orf71
16056	int	RELB (int) PLCXD1	false	int	RELB (int) PLCXD1
16058	int	IL6 (int) IL8	false	int	IL6 (int) IL8
16060	int	IL6 (int) VCAM1	false	int	IL6 (int) VCAM1
16061	int	IL6 (int) CXCL1	false	int	IL6 (int) CXCL1
16062	int	IL6 (int) PTGS2	false	int	IL6 (int) PTGS2
16065	int	TIMM8A (int) MNT	false	int	TIMM8A (int) MNT
16067	int	TIMM8A (int) LGR4	false	int	TIMM8A (int) LGR4
16070	int	KIF20B (int) MRPL22	false	int	KIF20B (int) MRPL22
16071	int	GPSM2 (int) RAD21	false	int	GPSM2 (int) RAD21
16074	int	NOTCH4 (int) ANGPT2	false	int	NOTCH4 (int) ANGPT2
16077	int	PITRM1 (int) PLAGL1	false	int	PITRM1 (int) PLAGL1
16079	int	PRDM2 (int) CDC2L6	false	int	PRDM2 (int) CDC2L6
16081	int	BMP2 (int) DUSP6	false	int	BMP2 (int) DUSP6
16084	int	MN1 (int) TEK	false	int	MN1 (int) TEK
16086	int	MN1 (int) SYNC	false	int	MN1 (int) SYNC
16087	int	TMSB15A (int) CSRP2	false	int	TMSB15A (int) CSRP2
16089	int	TMSB15A (int) TMSB15B	false	int	TMSB15A (int) TMSB15B
16091	int	TMSB15A (int) SNW1	false	int	TMSB15A (int) SNW1
16094	int	HOXB6 (int) HOXB7	false	int	HOXB6 (int) HOXB7
16096	int	HOXB6 (int) HOXB5	false	int	HOXB6 (int) HOXB5
16098	int	HOXB6 (int) POU4F1	false	int	HOXB6 (int) POU4F1
16100	int	HOXB6 (int) ACP6	false	int	HOXB6 (int) ACP6
16103	int	LRRC17 (int) ATP1B1	false	int	LRRC17 (int) ATP1B1
16106	int	AGPS (int) SFRP1	false	int	AGPS (int) SFRP1
16108	int	AGPS (int) NETO2	false	int	AGPS (int) NETO2
16111	int	SEMA5A (int) PTGIS	false	int	SEMA5A (int) PTGIS
16113	int	SEMA5A (int) SYNGR1	false	int	SEMA5A (int) SYNGR1
16115	int	RECK (int) PGRMC2	false	int	RECK (int) PGRMC2
16117	int	RECK (int) HIST1H2AC	false	int	RECK (int) HIST1H2AC
16119	int	RECK (int) GALNT2	false	int	RECK (int) GALNT2
16122	int	H2AFX (int) C12orf24	false	int	H2AFX (int) C12orf24
16125	int	ATF2 (int) RIT1	false	int	ATF2 (int) RIT1
16126	int	PLAU (int) MMP2	false	int	PLAU (int) MMP2
16128	int	PLAU (int) BHLHE40	false	int	PLAU (int) BHLHE40
16129	int	PLAU (int) PRNP	false	int	PLAU (int) PRNP
16131	int	PLAU (int) EGR1	false	int	PLAU (int) EGR1
16133	int	PLAU (int) TMEFF1	false	int	PLAU (int) TMEFF1
16135	int	PLAU (int) HRH1	false	int	PLAU (int) HRH1
16137	int	PLAU (int) FAM171A1	false	int	PLAU (int) FAM171A1
16139	int	PLAU (int) DKK3	false	int	PLAU (int) DKK3
16141	int	PLAU (int) ODZ3	false	int	PLAU (int) ODZ3
16144	int	SRPX2 (int) TSPAN6	false	int	SRPX2 (int) TSPAN6
16146	int	PDE10A (int) FUT8	false	int	PDE10A (int) FUT8
16148	int	ARHGEF15 (int) PLEKHF1	false	int	ARHGEF15 (int) PLEKHF1
16150	int	ARHGEF15 (int) RASIP1	false	int	ARHGEF15 (int) RASIP1
16152	int	RUNX1T1 (int) TRIB1	false	int	RUNX1T1 (int) TRIB1
16154	int	RUNX1T1 (int) GATA6	false	int	RUNX1T1 (int) GATA6
16156	int	RUNX1T1 (int) BMP4	false	int	RUNX1T1 (int) BMP4
16159	int	PCDH7 (int) RNF10	false	int	PCDH7 (int) RNF10
16161	int	GSPT2 (int) KLHL21	false	int	GSPT2 (int) KLHL21
16163	int	GSPT2 (int) SUOX	false	int	GSPT2 (int) SUOX
16165	int	GSPT2 (int) RCAN1	false	int	GSPT2 (int) RCAN1
16167	int	GSPT2 (int) CSTF2T	false	int	GSPT2 (int) CSTF2T
16169	int	GSPT2 (int) FANCF	false	int	GSPT2 (int) FANCF
16171	int	GSPT2 (int) RMND1	false	int	GSPT2 (int) RMND1
16173	int	TAGLN (int) PHTF2	false	int	TAGLN (int) PHTF2
16175	int	CHST1 (int) RASSF2	false	int	CHST1 (int) RASSF2
16177	int	CHST1 (int) ARL4D	false	int	CHST1 (int) ARL4D
16179	int	HRH1 (int) MTMR11	false	int	HRH1 (int) MTMR11
16181	int	NOS3 (int) BEX1	false	int	NOS3 (int) BEX1
16184	int	FGFR1OP (int) ATRN	false	int	FGFR1OP (int) ATRN
16186	int	SMURF2 (int) RPS6KA5	false	int	SMURF2 (int) RPS6KA5
16188	int	SMURF2 (int) CARHSP1	false	int	SMURF2 (int) CARHSP1
16190	int	PRRG1 (int) TANK	false	int	PRRG1 (int) TANK
16191	int	PCDH17 (int) PALM	false	int	PCDH17 (int) PALM
16192	int	PCDH17 (int) JAM2	false	int	PCDH17 (int) JAM2
16194	int	PCDH17 (int) TRAPPC2	false	int	PCDH17 (int) TRAPPC2
16196	int	LY75 (int) GPR126	false	int	LY75 (int) GPR126
16198	int	LY75 (int) SLC46A3	false	int	LY75 (int) SLC46A3
16200	int	DLEU1 (int) C17orf91	false	int	DLEU1 (int) C17orf91
16203	int	UBFD1 (int) NEK3	false	int	UBFD1 (int) NEK3
16206	int	DIAPH2 (int) ABCB6	false	int	DIAPH2 (int) ABCB6
16209	int	OSMR (int) LOC151162	false	int	OSMR (int) LOC151162
16210	int	ABLIM3 (int) CD99	false	int	ABLIM3 (int) CD99
16212	int	ABLIM3 (int) TCN2	false	int	ABLIM3 (int) TCN2
16215	int	BLM (int) LOC100287515	false	int	BLM (int) LOC100287515
16217	int	BLM (int) CCDC15	false	int	BLM (int) CCDC15
16220	int	CYP1A1 (int) EDC3	false	int	CYP1A1 (int) EDC3
16223	int	DUS4L (int) HMGN4	false	int	DUS4L (int) HMGN4
16225	int	DUS4L (int) C6orf130	false	int	DUS4L (int) C6orf130
16227	int	DUS4L (int) KIAA1305	false	int	DUS4L (int) KIAA1305
16229	int	IL7R (int) CDKN1A	false	int	IL7R (int) CDKN1A
16231	int	WASL (int) FAM115A	false	int	WASL (int) FAM115A
16233	int	WASL (int) CDC42BPA	false	int	WASL (int) CDC42BPA
16236	int	JAK2 (int) SAMD9	false	int	JAK2 (int) SAMD9
16239	int	ZC3H7B (int) SFN	false	int	ZC3H7B (int) SFN
16241	int	POLE2 (int) TFAM	false	int	POLE2 (int) TFAM
16243	int	POLE2 (int) NUP160	false	int	POLE2 (int) NUP160
16245	int	SETBP1 (int) C1orf21	false	int	SETBP1 (int) C1orf21
16247	int	PLCL1 (int) IL1RL1	false	int	PLCL1 (int) IL1RL1
16249	int	PLCL1 (int) PDGFD	false	int	PLCL1 (int) PDGFD
16251	int	SELP (int) PBX3	false	int	SELP (int) PBX3
16254	int	PTPN22 (int) COL4A6	false	int	PTPN22 (int) COL4A6
16257	int	CSNK2A1 (int) KIF5B	false	int	CSNK2A1 (int) KIF5B
16259	int	DISC1 (int) EDNRB	false	int	DISC1 (int) EDNRB
16261	int	DISC1 (int) SNCA	false	int	DISC1 (int) SNCA
16262	int	DISC1 (int) KCNK1	false	int	DISC1 (int) KCNK1
16264	int	GINS1 (int) RFC5	false	int	GINS1 (int) RFC5
16265	int	GINS1 (int) SKP2	false	int	GINS1 (int) SKP2
16267	int	GINS1 (int) ASF1B	false	int	GINS1 (int) ASF1B
16270	int	RAB5A (int) SS18	false	int	RAB5A (int) SS18
16273	int	EPHA4 (int) CARD10	false	int	EPHA4 (int) CARD10
16274	int	IL3RA (int) LDB2	false	int	IL3RA (int) LDB2
16276	int	IL3RA (int) KIAA0746	false	int	IL3RA (int) KIAA0746
16278	int	IL3RA (int) CDKN1C	false	int	IL3RA (int) CDKN1C
16281	int	GABPB1 (int) MINK1	false	int	GABPB1 (int) MINK1
16284	int	GRB14 (int) PSTPIP2	false	int	GRB14 (int) PSTPIP2
16285	int	GPR4 (int) CCDC86	false	int	GPR4 (int) CCDC86
16287	int	GPR4 (int) LETMD1	false	int	GPR4 (int) LETMD1
16289	int	GPR4 (int) RRP12	false	int	GPR4 (int) RRP12
16291	int	GPR4 (int) TBRG4	false	int	GPR4 (int) TBRG4
16293	int	GPR4 (int) ABHD2	false	int	GPR4 (int) ABHD2
16296	int	HOXA4 (int) HOXA5	false	int	HOXA4 (int) HOXA5
16298	int	HOXA4 (int) HOXA1	false	int	HOXA4 (int) HOXA1
16300	int	HOXA4 (int) SMAD3	false	int	HOXA4 (int) SMAD3
16302	int	ARHGAP22 (int) ASF1A	false	int	ARHGAP22 (int) ASF1A
16304	int	GALNS (int) GTF2H2	false	int	GALNS (int) GTF2H2
16305	int	CXCL6 (int) ICAM1	false	int	CXCL6 (int) ICAM1
16307	int	CXCL6 (int) IL1B	false	int	CXCL6 (int) IL1B
16309	int	CXCL6 (int) IL1A	false	int	CXCL6 (int) IL1A
16311	int	CXCL6 (int) LMCD1	false	int	CXCL6 (int) LMCD1
16313	int	KIF14 (int) KIF23	false	int	KIF14 (int) KIF23
16314	int	KIF14 (int) CDC25C	false	int	KIF14 (int) CDC25C
16316	int	G3BP2 (int) ITCH	false	int	G3BP2 (int) ITCH
16318	int	G3BP2 (int) TBL1X	false	int	G3BP2 (int) TBL1X
16320	int	G3BP2 (int) TWF1	false	int	G3BP2 (int) TWF1
16322	int	PDE3A (int) SLC9A1	false	int	PDE3A (int) SLC9A1
16324	int	PDE3A (int) ABCG2	false	int	PDE3A (int) ABCG2
16326	int	PDE3A (int) NAV2	false	int	PDE3A (int) NAV2
16328	int	PDE3A (int) PELI2	false	int	PDE3A (int) PELI2
16329	int	LDB2 (int) EPAS1	false	int	LDB2 (int) EPAS1
16331	int	LDB2 (int) ITPR1	false	int	LDB2 (int) ITPR1
16332	int	LDB2 (int) PIK3C2B	false	int	LDB2 (int) PIK3C2B
16333	int	LDB2 (int) NAV3	false	int	LDB2 (int) NAV3
16335	int	LDB2 (int) TFB1M	false	int	LDB2 (int) TFB1M
16338	int	RCC1 (int) EML2	false	int	RCC1 (int) EML2
16340	int	RCC1 (int) CCDC47	false	int	RCC1 (int) CCDC47
16342	int	SMARCA2 (int) JAK2	false	int	SMARCA2 (int) JAK2
16345	int	NUP155 (int) PIGZ	false	int	NUP155 (int) PIGZ
16347	int	EFEMP2 (int) SMARCD3	false	int	EFEMP2 (int) SMARCD3
16348	int	EFEMP2 (int) LRRC17	false	int	EFEMP2 (int) LRRC17
16350	int	EFEMP2 (int) EVL	false	int	EFEMP2 (int) EVL
16352	int	LY96 (int) C9orf95	false	int	LY96 (int) C9orf95
16355	int	HTR2B (int) SCN1B	false	int	HTR2B (int) SCN1B
16356	int	HTR2B (int) TNFSF9	false	int	HTR2B (int) TNFSF9
16358	int	HTR2B (int) RBL2	false	int	HTR2B (int) RBL2
16360	int	POLR3G (int) NOL12	false	int	POLR3G (int) NOL12
16362	int	GPR176 (int) PDLIM5	false	int	GPR176 (int) PDLIM5
16364	int	TEK (int) ARL6IP5	false	int	TEK (int) ARL6IP5
16366	int	CHST7 (int) PCYOX1	false	int	CHST7 (int) PCYOX1
16368	int	CHST7 (int) GLDC	false	int	CHST7 (int) GLDC
16369	int	ITGA10 (int) HTR2B	false	int	ITGA10 (int) HTR2B
16371	int	ITGA10 (int) IRS2	false	int	ITGA10 (int) IRS2
16373	int	ITGA10 (int) FUT4	false	int	ITGA10 (int) FUT4
16375	int	ITGA10 (int) HNMT	false	int	ITGA10 (int) HNMT
16377	int	ITGA10 (int) SNED1	false	int	ITGA10 (int) SNED1
16379	int	ITGA10 (int) CRTAC1	false	int	ITGA10 (int) CRTAC1
16381	int	HYAL2 (int) FNDC4	false	int	HYAL2 (int) FNDC4
16383	int	HYAL2 (int) OBFC1	false	int	HYAL2 (int) OBFC1
16385	int	HYAL2 (int) AKAP13	false	int	HYAL2 (int) AKAP13
16388	int	GCKR (int) ITPR3	false	int	GCKR (int) ITPR3
16390	int	GCKR (int) LAMA5	false	int	GCKR (int) LAMA5
16392	int	GCKR (int) USP18	false	int	GCKR (int) USP18
16395	int	STARD8 (int) SLC43A3	false	int	STARD8 (int) SLC43A3
16397	int	SLK (int) PROCR	false	int	SLK (int) PROCR
16399	int	TNFSF9 (int) LIPT1	false	int	TNFSF9 (int) LIPT1
16400	int	TNFSF9 (int) NLGN1	false	int	TNFSF9 (int) NLGN1
16402	int	TNFSF9 (int) KIF3A	false	int	TNFSF9 (int) KIF3A
16404	int	TNFSF9 (int) C1GALT1	false	int	TNFSF9 (int) C1GALT1
16406	int	GNA13 (int) FKBP5	false	int	GNA13 (int) FKBP5
16407	int	GNA13 (int) GABPB1	false	int	GNA13 (int) GABPB1
16409	int	GNA13 (int) ANAPC5	false	int	GNA13 (int) ANAPC5
16412	int	GLE1 (int) IVNS1ABP	false	int	GLE1 (int) IVNS1ABP
16414	int	NFIC (int) SAC3D1	false	int	NFIC (int) SAC3D1
16416	int	NFIC (int) C8orf55	false	int	NFIC (int) C8orf55
16418	int	MED20 (int) MTMR1	false	int	MED20 (int) MTMR1
16419	int	HSPH1 (int) AHSA1	false	int	HSPH1 (int) AHSA1
16420	int	HSPH1 (int) CSTF3	false	int	HSPH1 (int) CSTF3
16422	int	HSPH1 (int) METTL3	false	int	HSPH1 (int) METTL3
16424	int	HSPH1 (int) EFNA5	false	int	HSPH1 (int) EFNA5
16426	int	HSPH1 (int) GFOD2	false	int	HSPH1 (int) GFOD2
16428	int	HSPH1 (int) CHORDC1	false	int	HSPH1 (int) CHORDC1
16430	int	HSPH1 (int) AHI1	false	int	HSPH1 (int) AHI1
16432	int	PPP3CC (int) CASP3	false	int	PPP3CC (int) CASP3
16434	int	PPP3CC (int) SPTLC2	false	int	PPP3CC (int) SPTLC2
16436	int	SLC16A7 (int) RNF130	false	int	SLC16A7 (int) RNF130
16438	int	ASS1 (int) CPE	false	int	ASS1 (int) CPE
16439	int	ASS1 (int) RBP1	false	int	ASS1 (int) RBP1
16441	int	ASS1 (int) SLIT3	false	int	ASS1 (int) SLIT3
16442	int	ASS1 (int) MYO5A	false	int	ASS1 (int) MYO5A
16444	int	MED6 (int) CCT2	false	int	MED6 (int) CCT2
16445	int	MED6 (int) SNX2	false	int	MED6 (int) SNX2
16446	int	MED6 (int) FH	false	int	MED6 (int) FH
16448	int	MED6 (int) DNAJB6	false	int	MED6 (int) DNAJB6
16450	int	MED6 (int) ATG5	false	int	MED6 (int) ATG5
16452	int	MED6 (int) GRSF1	false	int	MED6 (int) GRSF1
16454	int	MED6 (int) ZNF227	false	int	MED6 (int) ZNF227
16456	int	MED6 (int) ANGEL2	false	int	MED6 (int) ANGEL2
16458	int	HMMR (int) CEP55	false	int	HMMR (int) CEP55
16459	int	CDH11 (int) IL1R1	false	int	CDH11 (int) IL1R1
16460	int	CDH11 (int) BAMBI	false	int	CDH11 (int) BAMBI
16462	int	CDH11 (int) C11orf80	false	int	CDH11 (int) C11orf80
16463	int	CDH11 (int) FN1	false	int	CDH11 (int) FN1
16465	int	CDH11 (int) POSTN	false	int	CDH11 (int) POSTN
16467	int	CDH11 (int) HEY1	false	int	CDH11 (int) HEY1
16469	int	TNIP1 (int) GNPTAB	false	int	TNIP1 (int) GNPTAB
16471	int	ART4 (int) CSF2RB	false	int	ART4 (int) CSF2RB
16473	int	TGFBR2 (int) SLC29A1	false	int	TGFBR2 (int) SLC29A1
16474	int	TGFBR2 (int) ADAM10	false	int	TGFBR2 (int) ADAM10
16476	int	TGFBR2 (int) UTRN	false	int	TGFBR2 (int) UTRN
16478	int	TGFBR2 (int) ZBTB1	false	int	TGFBR2 (int) ZBTB1
16480	int	TGFBR2 (int) NAMPT	false	int	TGFBR2 (int) NAMPT
16483	int	SCN5A (int) NR3C2	false	int	SCN5A (int) NR3C2
16485	int	SCN5A (int) C16orf45	false	int	SCN5A (int) C16orf45
16487	int	SCN5A (int) DCBLD2	false	int	SCN5A (int) DCBLD2
16489	int	SCN5A (int) DBNDD2	false	int	SCN5A (int) DBNDD2
16491	int	TNFSF4 (int) FRMD4A	false	int	TNFSF4 (int) FRMD4A
16493	int	TNFSF4 (int) CYB5R2	false	int	TNFSF4 (int) CYB5R2
16495	int	TNFSF4 (int) AGXT2L1	false	int	TNFSF4 (int) AGXT2L1
16497	int	MEIS2 (int) GDF15	false	int	MEIS2 (int) GDF15
16499	int	IL1RL1 (int) TACSTD2	false	int	IL1RL1 (int) TACSTD2
16500	int	IL1RL1 (int) NRCAM	false	int	IL1RL1 (int) NRCAM
16502	int	IL1RL1 (int) VIPR1	false	int	IL1RL1 (int) VIPR1
16504	int	RPGR (int) CROT	false	int	RPGR (int) CROT
16507	int	PDIA6 (int) PTPLA	false	int	PDIA6 (int) PTPLA
16509	int	NINL (int) ETV1	false	int	NINL (int) ETV1
16511	int	NCOR2 (int) NQO1	false	int	NCOR2 (int) NQO1
16513	int	NCOR2 (int) PPP1R13L	false	int	NCOR2 (int) PPP1R13L
16515	int	METTL7A (int) SLC7A8	false	int	METTL7A (int) SLC7A8
16517	int	METTL7A (int) ADA	false	int	METTL7A (int) ADA
16519	int	METTL7A (int) EMP2	false	int	METTL7A (int) EMP2
16521	int	PROS1 (int) TNFRSF1B	false	int	PROS1 (int) TNFRSF1B
16523	int	PROS1 (int) CTSO	false	int	PROS1 (int) CTSO
16525	int	PROS1 (int) NPR2	false	int	PROS1 (int) NPR2
16526	int	PROS1 (int) PIK3C2B	false	int	PROS1 (int) PIK3C2B
16528	int	PROS1 (int) ABCA8	false	int	PROS1 (int) ABCA8
16529	int	PROS1 (int) TAGLN	false	int	PROS1 (int) TAGLN
16531	int	PROS1 (int) CCL23	false	int	PROS1 (int) CCL23
16533	int	ATP6AP1 (int) NEU1	false	int	ATP6AP1 (int) NEU1
16535	int	PTK2 (int) FAR2	false	int	PTK2 (int) FAR2
16537	int	ID3 (int) ID1	false	int	ID3 (int) ID1
16540	int	ANAPC10 (int) FASTKD3	false	int	ANAPC10 (int) FASTKD3
16542	int	ANAPC10 (int) GIN1	false	int	ANAPC10 (int) GIN1
16544	int	CXCL3 (int) SLC25A12	false	int	CXCL3 (int) SLC25A12
16545	int	CXCL3 (int) HBEGF	false	int	CXCL3 (int) HBEGF
16547	int	NFAT5 (int) MLL	false	int	NFAT5 (int) MLL
16549	int	HMGA2 (int) ASB1	false	int	HMGA2 (int) ASB1
16552	int	TTC3 (int) TTLL1	false	int	TTC3 (int) TTLL1
16554	int	TTC3 (int) NPAS2	false	int	TTC3 (int) NPAS2
16557	int	AURKA (int) PSRC1	false	int	AURKA (int) PSRC1
16558	int	AURKA (int) CKS2	false	int	AURKA (int) CKS2
16559	int	AURKA (int) TROAP	false	int	AURKA (int) TROAP
16561	int	AURKA (int) ARL6IP1	false	int	AURKA (int) ARL6IP1
16563	int	AURKA (int) TMEM194A	false	int	AURKA (int) TMEM194A
16565	int	AURKA (int) VPS13B	false	int	AURKA (int) VPS13B
16567	int	TMX1 (int) PGRMC1	false	int	TMX1 (int) PGRMC1
16569	int	TMX1 (int) FCF1	false	int	TMX1 (int) FCF1
16572	int	LAS1L (int) KIAA0141	false	int	LAS1L (int) KIAA0141
16574	int	LAS1L (int) PA2G4	false	int	LAS1L (int) PA2G4
16575	int	LAS1L (int) TSPAN6	false	int	LAS1L (int) TSPAN6
16577	int	LAS1L (int) UTP20	false	int	LAS1L (int) UTP20
16579	int	LAS1L (int) C20orf27	false	int	LAS1L (int) C20orf27
16581	int	PTGIS (int) COL3A1	false	int	PTGIS (int) COL3A1
16584	int	RBM3 (int) PLCB2	false	int	RBM3 (int) PLCB2
16586	int	RBM3 (int) PSMD9	false	int	RBM3 (int) PSMD9
16589	int	ST3GAL1 (int) DENND3	false	int	ST3GAL1 (int) DENND3
16591	int	ST3GAL1 (int) NEFH	false	int	ST3GAL1 (int) NEFH
16594	int	MAPK1 (int) CDC5L	false	int	MAPK1 (int) CDC5L
16596	int	XPO7 (int) CSNK2A1	false	int	XPO7 (int) CSNK2A1
16597	int	XPO7 (int) MAPK1	false	int	XPO7 (int) MAPK1
16599	int	XPO7 (int) MAPK8	false	int	XPO7 (int) MAPK8
16601	int	XPO7 (int) PRKD3	false	int	XPO7 (int) PRKD3
16603	int	XPO7 (int) MAP3K7	false	int	XPO7 (int) MAP3K7
16604	int	XPO7 (int) HN1L	false	int	XPO7 (int) HN1L
16605	int	XPO7 (int) ARFGEF1	false	int	XPO7 (int) ARFGEF1
16607	int	SRRM2 (int) CHD4	false	int	SRRM2 (int) CHD4
16608	int	SRRM2 (int) AP3D1	false	int	SRRM2 (int) AP3D1
16610	int	SRRM2 (int) CUEDC1	false	int	SRRM2 (int) CUEDC1
16612	int	FLNB (int) DBN1	false	int	FLNB (int) DBN1
16614	int	FLNB (int) MACF1	false	int	FLNB (int) MACF1
16616	int	FLNB (int) AHNAK	false	int	FLNB (int) AHNAK
16618	int	FLNB (int) NES	false	int	FLNB (int) NES
16619	int	EIF4G1 (int) SEC63	false	int	EIF4G1 (int) SEC63
16621	int	EIF4G1 (int) FAF2	false	int	EIF4G1 (int) FAF2
16623	int	EIF4G1 (int) THOC2	false	int	EIF4G1 (int) THOC2
16625	int	MAGED2 (int) PALMD	false	int	MAGED2 (int) PALMD
16627	int	MAGED2 (int) SH3BP4	false	int	MAGED2 (int) SH3BP4
16630	int	PDLIM1 (int) TIMP1	false	int	PDLIM1 (int) TIMP1
16632	int	GARS (int) MARS	false	int	GARS (int) MARS
16634	int	GARS (int) MET	false	int	GARS (int) MET
16635	int	GARS (int) NAV3	false	int	GARS (int) NAV3
16637	int	GARS (int) ANKRD46	false	int	GARS (int) ANKRD46
16639	int	GARS (int) GTPBP2	false	int	GARS (int) GTPBP2
16642	int	APLP2 (int) PTPRK	false	int	APLP2 (int) PTPRK
16643	int	CCND1 (int) WWTR1	false	int	CCND1 (int) WWTR1
16644	int	CCND1 (int) ZNF185	false	int	CCND1 (int) ZNF185
16646	int	CCND1 (int) CDKN2A	false	int	CCND1 (int) CDKN2A
16648	int	CCND1 (int) SPTBN5	false	int	CCND1 (int) SPTBN5
16650	int	CCND1 (int) NTM	false	int	CCND1 (int) NTM
16653	int	OXA1L (int) MAP1B	false	int	OXA1L (int) MAP1B
16654	int	ANAPC5 (int) PRPF31	false	int	ANAPC5 (int) PRPF31
16656	int	ANAPC5 (int) GNAQ	false	int	ANAPC5 (int) GNAQ
16659	int	C1S (int) PPIF	false	int	C1S (int) PPIF
16661	int	C1S (int) CYP1B1	false	int	C1S (int) CYP1B1
16663	int	C1S (int) FAM189A2	false	int	C1S (int) FAM189A2
16665	int	C1S (int) C3	false	int	C1S (int) C3
16668	int	CD46 (int) SLC19A1	false	int	CD46 (int) SLC19A1
16670	int	CD46 (int) ASAP1	false	int	CD46 (int) ASAP1
16672	int	CLU (int) CD302	false	int	CLU (int) CD302
16673	int	CLU (int) CYP1A1	false	int	CLU (int) CYP1A1
16675	int	CLU (int) ABHD5	false	int	CLU (int) ABHD5
16677	int	CLU (int) SCARA3	false	int	CLU (int) SCARA3
16680	int	SRP72 (int) GUF1	false	int	SRP72 (int) GUF1
16682	int	HMGB2 (int) FAM129A	false	int	HMGB2 (int) FAM129A
16685	int	TAPBP (int) TAP1	false	int	TAPBP (int) TAP1
16687	int	TAPBP (int) U2AF2	false	int	TAPBP (int) U2AF2
16689	int	ADH5 (int) SUB1	false	int	ADH5 (int) SUB1
16691	int	CANX (int) CLINT1	false	int	CANX (int) CLINT1
16693	int	CANX (int) TNFRSF10B	false	int	CANX (int) TNFRSF10B
16695	int	CANX (int) KPNA4	false	int	CANX (int) KPNA4
16698	int	ATRX (int) ZKSCAN1	false	int	ATRX (int) ZKSCAN1
16701	int	CSNK1A1 (int) SF3A2	false	int	CSNK1A1 (int) SF3A2
16704	int	IDI1 (int) SCD	false	int	IDI1 (int) SCD
16705	int	IDI1 (int) INSIG1	false	int	IDI1 (int) INSIG1
16708	int	PLXNB2 (int) COL6A1	false	int	PLXNB2 (int) COL6A1
16710	int	TOP1 (int) SART3	false	int	TOP1 (int) SART3
16713	int	RPS28 (int) PSMD11	false	int	RPS28 (int) PSMD11
16715	int	SLC1A5 (int) FOXO1	false	int	SLC1A5 (int) FOXO1
16718	int	CLDND1 (int) SMAD4	false	int	CLDND1 (int) SMAD4
16720	int	CLDND1 (int) NCOA3	false	int	CLDND1 (int) NCOA3
16722	int	ID1 (int) BCL3	false	int	ID1 (int) BCL3
16724	int	DUT (int) NISCH	false	int	DUT (int) NISCH
16725	int	DUT (int) IFI27	false	int	DUT (int) IFI27
16727	int	DUT (int) P4HA2	false	int	DUT (int) P4HA2
16728	int	DUT (int) FADS3	false	int	DUT (int) FADS3
16729	int	DUT (int) SAP30	false	int	DUT (int) SAP30
16731	int	DUT (int) EIF2S2	false	int	DUT (int) EIF2S2
16733	int	DUT (int) POFUT2	false	int	DUT (int) POFUT2
16735	int	DUT (int) LAMB2	false	int	DUT (int) LAMB2
16737	int	DUT (int) SLC12A7	false	int	DUT (int) SLC12A7
16739	int	DUT (int) DRAM1	false	int	DUT (int) DRAM1
16741	int	DUT (int) ZNF586	false	int	DUT (int) ZNF586
16743	int	DUT (int) HNRNPD	false	int	DUT (int) HNRNPD
16745	int	C1orf63 (int) NKTR	false	int	C1orf63 (int) NKTR
16746	int	C1orf63 (int) SFRS17A	false	int	C1orf63 (int) SFRS17A
16748	int	C1orf63 (int) LUC7L3	false	int	C1orf63 (int) LUC7L3
16750	int	C1orf63 (int) ZC3HAV1	false	int	C1orf63 (int) ZC3HAV1
16752	int	C1orf63 (int) FUBP1	false	int	C1orf63 (int) FUBP1
16754	int	C1orf63 (int) ANKRD10	false	int	C1orf63 (int) ANKRD10
16756	int	C1orf63 (int) LONP2	false	int	C1orf63 (int) LONP2
16759	int	TRIO (int) UGCG	false	int	TRIO (int) UGCG
16761	int	CADM1 (int) ASB9	false	int	CADM1 (int) ASB9
16763	int	CADM1 (int) ITGA4	false	int	CADM1 (int) ITGA4
16765	int	CADM1 (int) C14orf132	false	int	CADM1 (int) C14orf132
16767	int	CADM1 (int) NAP1L2	false	int	CADM1 (int) NAP1L2
16769	int	PSMB8 (int) TXNIP	false	int	PSMB8 (int) TXNIP
16771	int	PSMB8 (int) PTPN18	false	int	PSMB8 (int) PTPN18
16772	int	PSMB8 (int) PSMB9	false	int	PSMB8 (int) PSMB9
16774	int	PSMB8 (int) BTN3A2	false	int	PSMB8 (int) BTN3A2
16776	int	PSMB8 (int) CDK10	false	int	PSMB8 (int) CDK10
16779	int	ZMYND8 (int) HCFC1R1	false	int	ZMYND8 (int) HCFC1R1
16782	int	RALGDS (int) PBX2	false	int	RALGDS (int) PBX2
16783	int	RALGDS (int) AHDC1	false	int	RALGDS (int) AHDC1
16785	int	RALGDS (int) ING1	false	int	RALGDS (int) ING1
16787	int	RALGDS (int) KANK2	false	int	RALGDS (int) KANK2
16789	int	RALGDS (int) ASB13	false	int	RALGDS (int) ASB13
16791	int	RALGDS (int) SH3TC1	false	int	RALGDS (int) SH3TC1
16793	int	RALGDS (int) NOD1	false	int	RALGDS (int) NOD1
16795	int	RALGDS (int) HIP1R	false	int	RALGDS (int) HIP1R
16797	int	WHSC1 (int) MYL5	false	int	WHSC1 (int) MYL5
16798	int	WHSC1 (int) LMNB2	false	int	WHSC1 (int) LMNB2
16800	int	CDC5L (int) ARHGDIA	false	int	CDC5L (int) ARHGDIA
16803	int	PAIP1 (int) AVL9	false	int	PAIP1 (int) AVL9
16805	int	PAIP1 (int) CYP26B1	false	int	PAIP1 (int) CYP26B1
16807	int	PAIP1 (int) PCIF1	false	int	PAIP1 (int) PCIF1
16809	int	COL18A1 (int) MXRA7	false	int	COL18A1 (int) MXRA7
16811	int	COL18A1 (int) KANK3	false	int	COL18A1 (int) KANK3
16812	int	JAG1 (int) RPS28	false	int	JAG1 (int) RPS28
16814	int	NR2F2 (int) OSMR	false	int	NR2F2 (int) OSMR
16815	int	NR2F2 (int) ZMYND8	false	int	NR2F2 (int) ZMYND8
16817	int	SART3 (int) PRPF6	false	int	SART3 (int) PRPF6
16818	int	SNAP23 (int) MAT2A	false	int	SNAP23 (int) MAT2A
16821	int	USP10 (int) PKP4	false	int	USP10 (int) PKP4
16823	int	USP10 (int) ZC3H11A	false	int	USP10 (int) ZC3H11A
16824	int	USP10 (int) TWF1	false	int	USP10 (int) TWF1
16826	int	USP10 (int) CDC27	false	int	USP10 (int) CDC27
16829	int	SC4MOL (int) SREBF2	false	int	SC4MOL (int) SREBF2
16830	int	SC4MOL (int) INSIG1	false	int	SC4MOL (int) INSIG1
16832	int	SC4MOL (int) DHCR7	false	int	SC4MOL (int) DHCR7
16834	int	SC4MOL (int) FDFT1	false	int	SC4MOL (int) FDFT1
16836	int	SC4MOL (int) HMGCS1	false	int	SC4MOL (int) HMGCS1
16838	int	MAN2B1 (int) STAB1	false	int	MAN2B1 (int) STAB1
16840	int	C10orf10 (int) BTG1	false	int	C10orf10 (int) BTG1
16842	int	C10orf10 (int) PTPRM	false	int	C10orf10 (int) PTPRM
16844	int	C10orf10 (int) SLC12A2	false	int	C10orf10 (int) SLC12A2
16846	int	C10orf10 (int) CPA3	false	int	C10orf10 (int) CPA3
16849	int	MEF2C (int) EVI2B	false	int	MEF2C (int) EVI2B
16851	int	MEF2C (int) PCTP	false	int	MEF2C (int) PCTP
16853	int	MFSD10 (int) COMT	false	int	MFSD10 (int) COMT
16856	int	SQLE (int) HMGCR	false	int	SQLE (int) HMGCR
16857	int	SQLE (int) SC4MOL	false	int	SQLE (int) SC4MOL
16858	int	SQLE (int) CYP51A1	false	int	SQLE (int) CYP51A1
16860	int	TUSC3 (int) ITM2C	false	int	TUSC3 (int) ITM2C
16863	int	DCTN5 (int) YKT6	false	int	DCTN5 (int) YKT6
16866	int	EMG1 (int) HNRNPM	false	int	EMG1 (int) HNRNPM
16867	int	EMG1 (int) EBNA1BP2	false	int	EMG1 (int) EBNA1BP2
16868	int	EMG1 (int) APPBP2	false	int	EMG1 (int) APPBP2
16870	int	EMG1 (int) LPP	false	int	EMG1 (int) LPP
16872	int	EMG1 (int) NUP88	false	int	EMG1 (int) NUP88
16873	int	EMG1 (int) SSSCA1	false	int	EMG1 (int) SSSCA1
16875	int	EMG1 (int) PHYH	false	int	EMG1 (int) PHYH
16877	int	EMG1 (int) PGCP	false	int	EMG1 (int) PGCP
16878	int	EMG1 (int) FEZ1	false	int	EMG1 (int) FEZ1
16879	int	EMG1 (int) KIAA0020	false	int	EMG1 (int) KIAA0020
16880	int	EMG1 (int) POP5	false	int	EMG1 (int) POP5
16881	int	EMG1 (int) DUS4L	false	int	EMG1 (int) DUS4L
16882	int	EMG1 (int) TTC3	false	int	EMG1 (int) TTC3
16884	int	EMG1 (int) CTDSP2	false	int	EMG1 (int) CTDSP2
16886	int	EMG1 (int) GGA2	false	int	EMG1 (int) GGA2
16888	int	EMG1 (int) LGALS3	false	int	EMG1 (int) LGALS3
16890	int	EMG1 (int) AK2	false	int	EMG1 (int) AK2
16892	int	EMG1 (int) UCK2	false	int	EMG1 (int) UCK2
16894	int	EMG1 (int) TPCN1	false	int	EMG1 (int) TPCN1
16895	int	EMG1 (int) TSR1	false	int	EMG1 (int) TSR1
16897	int	EMG1 (int) SNRNP25	false	int	EMG1 (int) SNRNP25
16899	int	KLHDC10 (int) NFAT5	false	int	KLHDC10 (int) NFAT5
16901	int	KLHDC10 (int) SP100	false	int	KLHDC10 (int) SP100
16903	int	KLHDC10 (int) PRRC1	false	int	KLHDC10 (int) PRRC1
16905	int	SLC39A8 (int) DNAJC6	false	int	SLC39A8 (int) DNAJC6
16907	int	SLC39A8 (int) UAP1	false	int	SLC39A8 (int) UAP1
16909	int	SLC39A8 (int) TSPYL5	false	int	SLC39A8 (int) TSPYL5
16911	int	SLC39A8 (int) BNIP3L	false	int	SLC39A8 (int) BNIP3L
16912	int	TFPI2 (int) ANPEP	false	int	TFPI2 (int) ANPEP
16914	int	TNFRSF10B (int) NFKB2	false	int	TNFRSF10B (int) NFKB2
16917	int	PSIP1 (int) PDCD11	false	int	PSIP1 (int) PDCD11
16919	int	UAP1 (int) SFXN3	false	int	UAP1 (int) SFXN3
16921	int	IKBKB (int) BMPR2	false	int	IKBKB (int) BMPR2
16923	int	IKBKB (int) LPIN1	false	int	IKBKB (int) LPIN1
16926	int	SIN3B (int) MKNK2	false	int	SIN3B (int) MKNK2
16928	int	SIN3B (int) FLJ10404	false	int	SIN3B (int) FLJ10404
16930	int	TNFRSF14 (int) RNF216	false	int	TNFRSF14 (int) RNF216
16932	int	ECM1 (int) IGF2BP3	false	int	ECM1 (int) IGF2BP3
16934	int	ABCC5 (int) C20orf19	false	int	ABCC5 (int) C20orf19
16935	int	DDIT3 (int) MAFG	false	int	DDIT3 (int) MAFG
16936	int	DDIT3 (int) HERPUD1	false	int	DDIT3 (int) HERPUD1
16938	int	DEAF1 (int) EIF2C2	false	int	DEAF1 (int) EIF2C2
16939	int	KIF2C (int) KIF22	false	int	KIF2C (int) KIF22
16941	int	SMPD1 (int) PLOD1	false	int	SMPD1 (int) PLOD1
16943	int	SMPD1 (int) CNTNAP1	false	int	SMPD1 (int) CNTNAP1
16946	int	SMTN (int) HSD17B11	false	int	SMTN (int) HSD17B11
16948	int	ARHGEF2 (int) IER2	false	int	ARHGEF2 (int) IER2
16950	int	ARHGEF2 (int) WASF3	false	int	ARHGEF2 (int) WASF3
16953	int	SYNE1 (int) CYLD	false	int	SYNE1 (int) CYLD
16954	int	TANK (int) AGL	false	int	TANK (int) AGL
16956	int	SLC9A1 (int) MLLT3	false	int	SLC9A1 (int) MLLT3
16958	int	SLC9A1 (int) PLXNA2	false	int	SLC9A1 (int) PLXNA2
16959	int	AURKB (int) DBF4	false	int	AURKB (int) DBF4
16961	int	AURKB (int) PTPRG	false	int	AURKB (int) PTPRG
16963	int	AURKB (int) APOBEC3B	false	int	AURKB (int) APOBEC3B
16965	int	SNRK (int) HSPB8	false	int	SNRK (int) HSPB8
16968	int	RBM4B (int) TRIM27	false	int	RBM4B (int) TRIM27
16970	int	RBM4B (int) C2CD2	false	int	RBM4B (int) C2CD2
16972	int	RBM4B (int) DCP2	false	int	RBM4B (int) DCP2
16974	int	RBM4B (int) C11orf75	false	int	RBM4B (int) C11orf75
16977	int	NCBP1 (int) GPER	false	int	NCBP1 (int) GPER
16980	int	CRAT (int) NPEPL1	false	int	CRAT (int) NPEPL1
16981	int	CRAT (int) PIGZ	false	int	CRAT (int) PIGZ
16984	int	CD34 (int) PRND	false	int	CD34 (int) PRND
16987	int	RIPK2 (int) MSX1	false	int	RIPK2 (int) MSX1
16989	int	RIPK2 (int) ZC3H12A	false	int	RIPK2 (int) ZC3H12A
16992	int	RRS1 (int) FILIP1L	false	int	RRS1 (int) FILIP1L
16994	int	RRS1 (int) TOR3A	false	int	RRS1 (int) TOR3A
16996	int	RRS1 (int) C1orf163	false	int	RRS1 (int) C1orf163
16998	int	RRS1 (int) C22orf29	false	int	RRS1 (int) C22orf29
17001	int	CD200 (int) PTHLH	false	int	CD200 (int) PTHLH
17002	int	PNMA2 (int) CCND2	false	int	PNMA2 (int) CCND2
17003	int	PNMA2 (int) ARMCX2	false	int	PNMA2 (int) ARMCX2
17005	int	PNMA2 (int) RGL1	false	int	PNMA2 (int) RGL1
17007	int	PNMA2 (int) SPATS2L	false	int	PNMA2 (int) SPATS2L
17010	int	NXT2 (int) PTER	false	int	NXT2 (int) PTER
17012	int	PPP2R3A (int) ELOVL6	false	int	PPP2R3A (int) ELOVL6
17014	int	PPP2R3A (int) PHLDA2	false	int	PPP2R3A (int) PHLDA2
17016	int	PPP2R3A (int) LRIG1	false	int	PPP2R3A (int) LRIG1
17019	int	BUB1 (int) MEGF6	false	int	BUB1 (int) MEGF6
17021	int	BUB1 (int) TMEM48	false	int	BUB1 (int) TMEM48
17023	int	CDKN2A (int) TGM2	false	int	CDKN2A (int) TGM2
17025	int	CDKN2A (int) JUN	false	int	CDKN2A (int) JUN
17027	int	PGF (int) EIF2B2	false	int	PGF (int) EIF2B2
17028	int	PGF (int) RGS3	false	int	PGF (int) RGS3
17030	int	PGF (int) SCHIP1	false	int	PGF (int) SCHIP1
17032	int	PGF (int) DPYD	false	int	PGF (int) DPYD
17034	int	PGF (int) BTK	false	int	PGF (int) BTK
17035	int	PGF (int) CHST1	false	int	PGF (int) CHST1
17037	int	PGF (int) JAM3	false	int	PGF (int) JAM3
17039	int	PGF (int) PLEKHO1	false	int	PGF (int) PLEKHO1
17041	int	TMEM47 (int) PMCH	false	int	TMEM47 (int) PMCH
17043	int	TMEM47 (int) CCNE1	false	int	TMEM47 (int) CCNE1
17044	int	CETN3 (int) ANAPC10	false	int	CETN3 (int) ANAPC10
17047	int	SMAGP (int) SEPT9	false	int	SMAGP (int) SEPT9
17049	int	KIFC1 (int) RCC1	false	int	KIFC1 (int) RCC1
17051	int	CDKN3 (int) PPIH	false	int	CDKN3 (int) PPIH
17052	int	CDKN3 (int) POLA1	false	int	CDKN3 (int) POLA1
17053	int	CDKN3 (int) DUT	false	int	CDKN3 (int) DUT
17054	int	CDKN3 (int) FANCI	false	int	CDKN3 (int) FANCI
17056	int	CDKN3 (int) APITD1	false	int	CDKN3 (int) APITD1
17058	int	CDKN3 (int) HAUS4	false	int	CDKN3 (int) HAUS4
17060	int	CDKN3 (int) CENPM	false	int	CDKN3 (int) CENPM
17062	int	CDKN3 (int) C7orf49	false	int	CDKN3 (int) C7orf49
17065	int	IFFO1 (int) CHKB	false	int	IFFO1 (int) CHKB
17067	int	IFFO1 (int) RGS12	false	int	IFFO1 (int) RGS12
17069	int	CLEC2B (int) ALDH1A3	false	int	CLEC2B (int) ALDH1A3
17070	int	ADAM19 (int) PLOD1	false	int	ADAM19 (int) PLOD1
17072	int	ADAM19 (int) TSPAN14	false	int	ADAM19 (int) TSPAN14
17074	int	RRM2 (int) EXO1	false	int	RRM2 (int) EXO1
17076	int	RRM2 (int) FAM111A	false	int	RRM2 (int) FAM111A
17077	int	CXCL2 (int) TNFAIP3	false	int	CXCL2 (int) TNFAIP3
17079	int	CXCL2 (int) CCL2	false	int	CXCL2 (int) CCL2
17081	int	PHTF2 (int) ETNK1	false	int	PHTF2 (int) ETNK1
17083	int	PHTF2 (int) COPZ2	false	int	PHTF2 (int) COPZ2
17086	int	KHDRBS3 (int) IFI35	false	int	KHDRBS3 (int) IFI35
17088	int	PLA2G4C (int) FAM114A1	false	int	PLA2G4C (int) FAM114A1
17090	int	CORO2B (int) GPX3	false	int	CORO2B (int) GPX3
17092	int	PRKAA1 (int) GMFB	false	int	PRKAA1 (int) GMFB
17094	int	PRKAA1 (int) CREBZF	false	int	PRKAA1 (int) CREBZF
17096	int	PRKAA1 (int) PIGB	false	int	PRKAA1 (int) PIGB
17098	int	PRKAA1 (int) B3GNT2	false	int	PRKAA1 (int) B3GNT2
17101	int	HIST1H2BK (int) PRUNE2	false	int	HIST1H2BK (int) PRUNE2
17103	int	IL33 (int) PTPRD	false	int	IL33 (int) PTPRD
17105	int	UCK2 (int) EPM2AIP1	false	int	UCK2 (int) EPM2AIP1
17106	int	UCK2 (int) ATRX	false	int	UCK2 (int) ATRX
17108	int	UCK2 (int) MCFD2	false	int	UCK2 (int) MCFD2
17110	int	CDC42EP2 (int) MDFI	false	int	CDC42EP2 (int) MDFI
17112	int	SPC25 (int) ZHX2	false	int	SPC25 (int) ZHX2
17115	int	ATP2C1 (int) IRGQ	false	int	ATP2C1 (int) IRGQ
17117	int	SS18 (int) ELL2	false	int	SS18 (int) ELL2
17118	int	GABBR2 (int) ATF3	false	int	GABBR2 (int) ATF3
17120	int	GABBR2 (int) C9orf125	false	int	GABBR2 (int) C9orf125
17121	int	GABBR2 (int) FAM189A2	false	int	GABBR2 (int) FAM189A2
17123	int	GATA6 (int) USP33	false	int	GATA6 (int) USP33
17126	int	PGM3 (int) ABL2	false	int	PGM3 (int) ABL2
17128	int	PGM3 (int) GOLT1B	false	int	PGM3 (int) GOLT1B
17129	int	CTSZ (int) ZC3H7B	false	int	CTSZ (int) ZC3H7B
17131	int	CTSZ (int) TGOLN2	false	int	CTSZ (int) TGOLN2
17134	int	TPX2 (int) DARS2	false	int	TPX2 (int) DARS2
17136	int	TPX2 (int) HJURP	false	int	TPX2 (int) HJURP
17138	int	TPX2 (int) DEPDC1	false	int	TPX2 (int) DEPDC1
17140	int	TPX2 (int) CDCA3	false	int	TPX2 (int) CDCA3
17142	int	TAF5 (int) MON1B	false	int	TAF5 (int) MON1B
17144	int	TAF5 (int) MPPE1	false	int	TAF5 (int) MPPE1
17146	int	TAF5 (int) FANCL	false	int	TAF5 (int) FANCL
17148	int	FYN (int) PTGIS	false	int	FYN (int) PTGIS
17150	int	FYN (int) LEPREL1	false	int	FYN (int) LEPREL1
17151	int	IL1A (int) IL1B	false	int	IL1A (int) IL1B
17153	int	IL1A (int) HDAC9	false	int	IL1A (int) HDAC9
17156	int	PMP22 (int) RAGE	false	int	PMP22 (int) RAGE
17158	int	PMP22 (int) NOVA1	false	int	PMP22 (int) NOVA1
17160	int	PMP22 (int) CCRL2	false	int	PMP22 (int) CCRL2
17162	int	PMP22 (int) ITGA6	false	int	PMP22 (int) ITGA6
17164	int	LAMA5 (int) SLCO3A1	false	int	LAMA5 (int) SLCO3A1
17166	int	NR5A2 (int) AGXT2L1	false	int	NR5A2 (int) AGXT2L1
17168	int	FKBP1A (int) EDIL3	false	int	FKBP1A (int) EDIL3
17170	int	FKBP1A (int) PXN	false	int	FKBP1A (int) PXN
17172	int	FKBP1A (int) PRKAG2	false	int	FKBP1A (int) PRKAG2
17174	int	MAP3K7IP2 (int) SRPK1	false	int	MAP3K7IP2 (int) SRPK1
17175	int	MAP3K7IP2 (int) ATF2	false	int	MAP3K7IP2 (int) ATF2
17177	int	WTAP (int) FBXO17	false	int	WTAP (int) FBXO17
17180	int	KLRG1 (int) OSBPL1A	false	int	KLRG1 (int) OSBPL1A
17182	int	KLRG1 (int) GPR125	false	int	KLRG1 (int) GPR125
17185	int	CLK4 (int) SFRS18	false	int	CLK4 (int) SFRS18
17187	int	PTHLH (int) PLIN2	false	int	PTHLH (int) PLIN2
17189	int	PTHLH (int) CNPY2	false	int	PTHLH (int) CNPY2
17191	int	ODF2 (int) HSD17B14	false	int	ODF2 (int) HSD17B14
17193	int	FN1 (int) FRY	false	int	FN1 (int) FRY
17194	int	VEGFA (int) IFRD1	false	int	VEGFA (int) IFRD1
17195	int	VEGFA (int) MAFG	false	int	VEGFA (int) MAFG
17198	int	AKAP12 (int) DHRS7	false	int	AKAP12 (int) DHRS7
17200	int	CCL23 (int) CCL14	false	int	CCL23 (int) CCL14
17202	int	CCL23 (int) FBXO42	false	int	CCL23 (int) FBXO42
17204	int	GBAP (int) ESYT1	false	int	GBAP (int) ESYT1
17206	int	GBAP (int) GBA	false	int	GBAP (int) GBA
17207	int	SAT1 (int) STAT1	false	int	SAT1 (int) STAT1
17209	int	SAT1 (int) B4GALT1	false	int	SAT1 (int) B4GALT1
17211	int	SAT1 (int) PAPSS2	false	int	SAT1 (int) PAPSS2
17213	int	SAT1 (int) OSGIN2	false	int	SAT1 (int) OSGIN2
17215	int	SAT1 (int) RND1	false	int	SAT1 (int) RND1
17216	int	ATG5 (int) MCL1	false	int	ATG5 (int) MCL1
17218	int	BCKDHB (int) GCHFR	false	int	BCKDHB (int) GCHFR
17220	int	CACYBP (int) HSPE1	false	int	CACYBP (int) HSPE1
17223	int	CLIP1 (int) CREM	false	int	CLIP1 (int) CREM
17225	int	CSE1L (int) SPA17	false	int	CSE1L (int) SPA17
17228	int	FLI1 (int) SCARB2	false	int	FLI1 (int) SCARB2
17230	int	FLI1 (int) LRP3	false	int	FLI1 (int) LRP3
17232	int	FLI1 (int) BMX	false	int	FLI1 (int) BMX
17234	int	DHRS7 (int) TM6SF1	false	int	DHRS7 (int) TM6SF1
17236	int	DIMT1L (int) TRAF4	false	int	DIMT1L (int) TRAF4
17238	int	DIMT1L (int) PGGT1B	false	int	DIMT1L (int) PGGT1B
17240	int	DIMT1L (int) KIAA0913	false	int	DIMT1L (int) KIAA0913
17242	int	DIMT1L (int) PAPOLA	false	int	DIMT1L (int) PAPOLA
17245	int	PON2 (int) CALM1	false	int	PON2 (int) CALM1
17248	int	TP53TG1 (int) DHRS3	false	int	TP53TG1 (int) DHRS3
17250	int	GTF2I (int) MAPK14	false	int	GTF2I (int) MAPK14
17252	int	GTF2I (int) DGKA	false	int	GTF2I (int) DGKA
17255	int	ASPH (int) ADAM9	false	int	ASPH (int) ADAM9
17257	int	RNF6 (int) NRAS	false	int	RNF6 (int) NRAS
17259	int	RNF6 (int) LOC653390	false	int	RNF6 (int) LOC653390
17261	int	RNF6 (int) TOX4	false	int	RNF6 (int) TOX4
17263	int	WDR1 (int) CRK	false	int	WDR1 (int) CRK
17264	int	WDR1 (int) FH	false	int	WDR1 (int) FH
17265	int	WDR1 (int) MFNG	false	int	WDR1 (int) MFNG
17266	int	WDR1 (int) GNAQ	false	int	WDR1 (int) GNAQ
17268	int	WDR1 (int) GNB5	false	int	WDR1 (int) GNB5
17270	int	WDR1 (int) RBM9	false	int	WDR1 (int) RBM9
17272	int	WDR1 (int) KCTD20	false	int	WDR1 (int) KCTD20
17274	int	WDR1 (int) POLDIP3	false	int	WDR1 (int) POLDIP3
17276	int	WDR1 (int) ARHGAP1	false	int	WDR1 (int) ARHGAP1
17277	int	FDFT1 (int) FADS2	false	int	FDFT1 (int) FADS2
17278	int	FDFT1 (int) CYP51A1	false	int	FDFT1 (int) CYP51A1
17280	int	MCM7 (int) SSRP1	false	int	MCM7 (int) SSRP1
17281	int	MCM7 (int) RANBP1	false	int	MCM7 (int) RANBP1
17282	int	MCM7 (int) KRR1	false	int	MCM7 (int) KRR1
17283	int	MCM7 (int) EZH2	false	int	MCM7 (int) EZH2
17285	int	MCM7 (int) TMEM159	false	int	MCM7 (int) TMEM159
17287	int	MCM7 (int) FBXL2	false	int	MCM7 (int) FBXL2
17288	int	TPM1 (int) MYL9	false	int	TPM1 (int) MYL9
17289	int	TPM1 (int) IGFBP7	false	int	TPM1 (int) IGFBP7
17290	int	TPM1 (int) SLC16A3	false	int	TPM1 (int) SLC16A3
17291	int	TPM1 (int) LOXL1	false	int	TPM1 (int) LOXL1
17293	int	TPM1 (int) CBLB	false	int	TPM1 (int) CBLB
17295	int	TPM1 (int) IGFBP3	false	int	TPM1 (int) IGFBP3
17296	int	TPM1 (int) ARMCX3	false	int	TPM1 (int) ARMCX3
17298	int	TPM1 (int) TMEM45A	false	int	TPM1 (int) TMEM45A
17300	int	TPM1 (int) SLC27A3	false	int	TPM1 (int) SLC27A3
17302	int	SMAD1 (int) KIT	false	int	SMAD1 (int) KIT
17304	int	MGLL (int) EPAS1	false	int	MGLL (int) EPAS1
17306	int	MGLL (int) TXNRD2	false	int	MGLL (int) TXNRD2
17308	int	MGLL (int) CXCR7	false	int	MGLL (int) CXCR7
17310	int	CLIP2 (int) ADARB1	false	int	CLIP2 (int) ADARB1
17311	int	CLIP2 (int) TIMM8A	false	int	CLIP2 (int) TIMM8A
17313	int	CLIP2 (int) RBPMS	false	int	CLIP2 (int) RBPMS
17316	int	C12orf51 (int) NLRP1	false	int	C12orf51 (int) NLRP1
17318	int	C12orf51 (int) ZCCHC6	false	int	C12orf51 (int) ZCCHC6
17320	int	PDIA4 (int) NUCB2	false	int	PDIA4 (int) NUCB2
17322	int	MLLT11 (int) MARCKS	false	int	MLLT11 (int) MARCKS
17324	int	MLLT11 (int) RAI14	false	int	MLLT11 (int) RAI14
17326	int	MLLT11 (int) INPP1	false	int	MLLT11 (int) INPP1
17328	int	MLLT11 (int) BPGM	false	int	MLLT11 (int) BPGM
17329	int	MLLT11 (int) SRPX2	false	int	MLLT11 (int) SRPX2
17331	int	MLLT11 (int) TSPAN4	false	int	MLLT11 (int) TSPAN4
17333	int	MLLT11 (int) HSD17B8	false	int	MLLT11 (int) HSD17B8
17335	int	MLLT11 (int) GSDMD	false	int	MLLT11 (int) GSDMD
17337	int	MAP4K5 (int) PRPF6	false	int	MAP4K5 (int) PRPF6
17339	int	PRPF4B (int) USP34	false	int	PRPF4B (int) USP34
17342	int	DLAT (int) IDE	false	int	DLAT (int) IDE
17343	int	DLAT (int) MRPL42	false	int	DLAT (int) MRPL42
17346	int	PPP2R5D (int) H2AFY	false	int	PPP2R5D (int) H2AFY
17349	int	DEDD (int) RCN3	false	int	DEDD (int) RCN3
17351	int	TBX1 (int) DISC1	false	int	TBX1 (int) DISC1
17353	int	TBX1 (int) CLDN11	false	int	TBX1 (int) CLDN11
17355	int	TBX1 (int) APOLD1	false	int	TBX1 (int) APOLD1
17357	int	FLOT2 (int) SDPR	false	int	FLOT2 (int) SDPR
17359	int	FLOT2 (int) FAM108B1	false	int	FLOT2 (int) FAM108B1
17362	int	KIAA1539 (int) PPFIBP2	false	int	KIAA1539 (int) PPFIBP2
17364	int	KIAA1539 (int) TBXA2R	false	int	KIAA1539 (int) TBXA2R
17365	int	CCRL2 (int) STARD8	false	int	CCRL2 (int) STARD8
17367	int	NFIB (int) USE1	false	int	NFIB (int) USE1
17370	int	ROCK2 (int) DAG1	false	int	ROCK2 (int) DAG1
17372	int	BMP4 (int) SLC26A2	false	int	BMP4 (int) SLC26A2
17374	int	BMP4 (int) LPXN	false	int	BMP4 (int) LPXN
17377	int	FGFR1 (int) DDR2	false	int	FGFR1 (int) DDR2
17379	int	FGFR1 (int) GPR56	false	int	FGFR1 (int) GPR56
17381	int	PAFAH1B1 (int) USP46	false	int	PAFAH1B1 (int) USP46
17383	int	PAFAH1B1 (int) SGCB	false	int	PAFAH1B1 (int) SGCB
17385	int	PAFAH1B1 (int) VAMP3	false	int	PAFAH1B1 (int) VAMP3
17386	int	PAFAH1B1 (int) COPA	false	int	PAFAH1B1 (int) COPA
17388	int	PAFAH1B1 (int) PTPLAD1	false	int	PAFAH1B1 (int) PTPLAD1
17390	int	LRIG1 (int) TM4SF1	false	int	LRIG1 (int) TM4SF1
17393	int	ETV4 (int) KANK1	false	int	ETV4 (int) KANK1
17395	int	ARPC4 (int) EEF1D	false	int	ARPC4 (int) EEF1D
17398	int	BBC3 (int) TCF15	false	int	BBC3 (int) TCF15
17400	int	HNMT (int) MMP16	false	int	HNMT (int) MMP16
17402	int	B3GALNT1 (int) INSIG2	false	int	B3GALNT1 (int) INSIG2
17404	int	EWSR1 (int) RALB	false	int	EWSR1 (int) RALB
17405	int	EWSR1 (int) FLI1	false	int	EWSR1 (int) FLI1
17407	int	EWSR1 (int) BEX4	false	int	EWSR1 (int) BEX4
17409	int	EWSR1 (int) ATP11A	false	int	EWSR1 (int) ATP11A
17410	int	HSPA5 (int) HSP90B1	false	int	HSPA5 (int) HSP90B1
17412	int	HSPA5 (int) SEL1L	false	int	HSPA5 (int) SEL1L
17414	int	HSPA5 (int) SERPINH1	false	int	HSPA5 (int) SERPINH1
17417	int	GPR107 (int) KIAA0513	false	int	GPR107 (int) KIAA0513
17418	int	GPR107 (int) DIMT1L	false	int	GPR107 (int) DIMT1L
17420	int	GPR107 (int) NFE2L1	false	int	GPR107 (int) NFE2L1
17422	int	COL4A1 (int) COL4A2	false	int	COL4A1 (int) COL4A2
17424	int	CALM1 (int) KIAA0494	false	int	CALM1 (int) KIAA0494
17426	int	AHNAK (int) RNASE1	false	int	AHNAK (int) RNASE1
17429	int	HLA-DPA1 (int) HLA-DPB1	false	int	HLA-DPA1 (int) HLA-DPB1
17431	int	LOC100132247 (int) BET1	false	int	LOC100132247 (int) BET1
17433	int	LOC100132247 (int) SFRS14	false	int	LOC100132247 (int) SFRS14
17436	int	H3F3B (int) GGCX	false	int	H3F3B (int) GGCX
17439	int	UBXN4 (int) GDI2	false	int	UBXN4 (int) GDI2
17440	int	UBXN4 (int) TRAM1	false	int	UBXN4 (int) TRAM1
17441	int	UBXN4 (int) CLIC4	false	int	UBXN4 (int) CLIC4
17442	int	UBXN4 (int) ATP6V1A	false	int	UBXN4 (int) ATP6V1A
17443	int	UBXN4 (int) SPTLC1	false	int	UBXN4 (int) SPTLC1
17444	int	UBXN4 (int) TMED2	false	int	UBXN4 (int) TMED2
[truncated: 1,384 more rows]
