# Supplementary material for: Oxidized phospholipids regulate amino acid metabolism through MTHFD2 to facilitate nucleotide release in endothelial cells
Source: Nat Commun. 2018 Jun 12;9:2292. doi: 10.1038/s41467-018-04602-0 (PMC5997752; doi:10.1038/s41467-018-04602-0)
Supplement: Supplementary file 5 — Supplementary Data 3 [file 41467_2018_4602_MOESM5_ESM.xlsx]

## Sheet: MTHFD2_RNAseq_TgwFDR005_enrich_
Gene Set Category (MSigDB v6.0)	Number of Genes in Gene Set Category	Overlap with DEG	Oddratio	p-value	Overlap_genes
KRIGE_RESPONSE_TO_TOSEDOSTAT_24HR_UP	767	28	14.6293	1.14407e-20	ASNS,ALDH1L2,PSAT1,PHGDH,CHAC1,PCK2,MTHFD2,SLC1A4,WARS,CBS,SLC7A11,PSPH,LACC1,VLDLR,STC2,GARS,PMAIP1,FAM129A,ATF3,TUBE1,CARS,SLC3A2,MARS,SQSTM1,CEBPB,AARS,METTL7A,SHMT2
KRIGE_AMINO_ACID_DEPRIVATION	29	11	187.135	3.02304e-20	ASNS,PSAT1,CHAC1,WARS,CBS,SLC7A11,STC2,ATF3,CARS,MARS,CEBPB
HELLER_SILENCED_BY_METHYLATION_DN	104	15	54.609	3.41894e-20	ASNS,PSAT1,PHGDH,HMOX1,CHAC1,SLC1A4,WARS,CBS,SLC7A11,FAM129A,ATF3,SLC3A2,MARS,CEBPB,SHMT2
ZHAN_MULTIPLE_MYELOMA_CD1_VS_CD2_UP	66	13	77.3751	1.6619e-19	ASNS,ALDH1L2,PHGDH,PCK2,MTHFD2,SLC7A5,WARS,RBP1,SLC7A11,VLDLR,STC2,FAM129A,CEBPB
HALLMARK_MTORC1_SIGNALING	200	17	30.8857	9.33005e-19	ASNS,PSAT1,PHGDH,NUPR1,IGFBP5,MTHFD2,SLC1A4,SLC7A5,WARS,SLC7A11,PSPH,VLDLR,FAM129A,SQSTM1,FADS2,SHMT2,TXNRD1
KRIGE_RESPONSE_TO_TOSEDOSTAT_6HR_UP	939	27	11.1512	2.74047e-17	ASNS,ALDH1L2,PSAT1,PHGDH,CHAC1,PCK2,MTHFD2,SLC1A4,WARS,CBS,SLC7A11,PSPH,LACC1,VLDLR,STC2,GARS,PMAIP1,FAM129A,ATF3,TUBE1,CARS,SLC3A2,MARS,CEBPB,AARS,METTL7A,SHMT2
BLUM_RESPONSE_TO_SALIRASIB_UP	245	17	24.7401	2.95124e-17	ASNS,PSAT1,PHGDH,NUPR1,ANK2,MTHFD2,WARS,CBS,STC2,GARS,ATF3,CARS,MARS,SQSTM1,AARS,SHMT2,IARS
CHICAS_RB1_TARGETS_CONFLUENT	558	22	14.4867	6.38394e-17	NPTX1,ASNS,JDP2,PSAT1,PHGDH,STMN3,PCK2,POSTN,NUPR1,MTHFD2,SLC1A4,SLC7A5,WARS,CCDC80,RBP1,CBS,PSPH,GARS,FAM129A,NAV3,METTL7A,SHMT2
PENG_LEUCINE_DEPRIVATION_UP	140	14	35.4779	1.34738e-16	ASNS,PHGDH,PCK2,MTHFD2,SLC1A4,WARS,PSPH,GARS,CARS,SLC3A2,MARS,CEBPB,AARS,SHMT2
PODAR_RESPONSE_TO_ADAPHOSTIN_UP	145	14	34.1183	2.22294e-16	ASNS,PSAT1,HMOX1,CHAC1,SLC7A11,GARS,PMAIP1,FAM129A,ATF3,CARS,SLC3A2,MARS,SQSTM1,CEBPB
MTOR_UP.N4.V1_UP	195	15	26.9136	5.43883e-16	ASNS,PHGDH,CHAC1,SLC6A9,PCK2,SLC7A5,SLC7A11,PSPH,VLDLR,FAM129A,ATF3,CARS,SLC3A2,MARS,CEBPB
BOQUEST_STEM_CELL_CULTURED_VS_FRESH_UP	425	19	15.8755	1.15003e-15	ASNS,PSAT1,ANK2,SLC1A4,SLC7A5,WARS,CBS,SLC7A11,EDNRB,STC2,PMAIP1,ATF3,MARS,SLC38A1,YARS,METTL7A,SHMT2,TXNRD1,IARS
GARY_CD5_TARGETS_UP	469	19	14.2997	6.8742e-15	ASNS,PSAT1,PHGDH,PCK2,SLC1A4,WARS,CBS,SLC7A11,VLDLR,GARS,PMAIP1,TUBE1,CARS,SLC3A2,MARS,SQSTM1,CEBPB,AARS,SHMT2
CHICAS_RB1_TARGETS_GROWING	239	15	21.6107	1.12423e-14	ASNS,ALDH1L2,PSAT1,PHGDH,STMN3,PCK2,POSTN,NUPR1,SLC1A4,CCDC80,RBP1,PSPH,FAM129A,KIF20A,SHMT2
GSE24634_IL4_VS_CTRL_TREATED_NAIVE_CD4_TCELL_DAY7_DN	198	14	24.2378	1.78325e-14	ASNS,PHGDH,PCK2,MTHFD2,WARS,CD14,FAM129A,ATF3,CARS,SQSTM1,CEBPB,AARS,SHMT2,TXNRD1
GSE2770_UNTREATED_VS_IL12_TREATED_ACT_CD4_TCELL_6H_UP	200	14	23.9765	2.05059e-14	ASNS,JDP2,PHGDH,CHAC1,SLC6A9,PCK2,SLC1A4,SLC7A5,PSPH,ATF3,CARS,SLC3A2,CEBPB,AARS
NFE2L2.V2	453	18	13.817	5.37585e-14	ASNS,JDP2,PSAT1,PHGDH,HMOX1,CHAC1,PCK2,NUPR1,MTHFD2,SLC1A4,CBS,SLC7A11,REEP1,MRAP2,STC2,MARS,SQSTM1,TXNRD1
GO_CELLULAR_AMINO_ACID_METABOLIC_PROCESS	330	16	16.6095	7.54458e-14	ASNS,ALDH1L2,PSAT1,PHGDH,MTHFD2,SLC7A5,WARS,CBS,PSPH,GARS,CARS,MARS,YARS,AARS,SHMT2,IARS
HELLER_HDAC_TARGETS_DN	289	15	17.6224	1.819e-13	PSAT1,HMOX1,CHAC1,SLC1A4,SLC7A5,CCND2,CBS,SLC7A11,PSPH,PMAIP1,ATF3,SLC3A2,SLC38A1,CEBPB,SHMT2
KAN_RESPONSE_TO_ARSENIC_TRIOXIDE	122	11	30.4038	9.303e-13	ASNS,PSAT1,PHGDH,HMOX1,NUPR1,IGFBP5,CBS,SLC7A11,STC2,ATF3,KIF20A
IGARASHI_ATF4_TARGETS_DN	89	10	38.3592	1.13132e-12	ASNS,PSAT1,PHGDH,PCK2,ANK2,SLC1A4,SLC7A5,CBS,STC2,SLC3A2
HELLER_HDAC_TARGETS_SILENCED_BY_METHYLATION_DN	278	14	16.8415	1.87488e-12	PSAT1,HMOX1,CHAC1,SLC1A4,SLC7A5,CCND2,CBS,SLC7A11,FAM129A,ATF3,SLC3A2,SLC38A1,CEBPB,SHMT2
REACTOME_CYTOSOLIC_TRNA_AMINOACYLATION	24	7	120.415	2.44439e-12	WARS,GARS,CARS,MARS,YARS,AARS,IARS
NAKAMURA_CANCER_MICROENVIRONMENT_DN	46	8	62.242	5.88703e-12	ASNS,PSAT1,SLC7A11,PSPH,CARS,MARS,TXNRD1,IARS
GSE6674_CPG_VS_PL2_3_STIM_BCELL_DN	199	12	19.8883	9.84138e-12	ASNS,CHAC1,MTHFD2,SLC7A5,GRAMD1B,GARS,SLC3A2,MARS,YARS,AARS,SHMT2,IARS
RODRIGUES_THYROID_CARCINOMA_ANAPLASTIC_UP	709	19	9.22499	1.02379e-11	BIRC3,ASNS,PSAT1,MTHFD2,SLC1A4,SLC7A5,WARS,HMGA2,SLC7A11,PSPH,NXPH4,STC2,PMAIP1,CARS,SLC38A1,YARS,SHMT2,TXNRD1,IARS
HALLMARK_UNFOLDED_PROTEIN_RESPONSE	113	10	29.407	1.28589e-11	ASNS,PSAT1,CHAC1,MTHFD2,SLC1A4,SLC7A5,STC2,ATF3,CEBPB,IARS
TIEN_INTESTINE_PROBIOTICS_24HR_DN	213	12	18.4965	2.18383e-11	ASNS,PCK2,MTHFD2,SLC1A4,WARS,GARS,ATF3,SLC3A2,SQSTM1,CEBPB,AARS,TXNRD1
LI_WILMS_TUMOR_VS_FETAL_KIDNEY_1_DN	163	11	22.1656	2.24731e-11	ASNS,MTHFD2,CCND2,HMGA2,GARS,MARS,FADS2,YARS,SHMT2,TXNRD1,IARS
FORTSCHEGGER_PHF8_TARGETS_UP	272	13	15.7272	2.37652e-11	NPTX1,ASNS,ALDH1L2,PHGDH,HMOX1,CHAC1,PCK2,NUPR1,MTHFD2,SLC7A11,VLDLR,GRAMD1B,STC2
GARGALOVIC_RESPONSE_TO_OXIDIZED_PHOSPHOLIPIDS_RED_UP	17	6	157.062	2.58367e-11	CHAC1,MTHFD2,SLC7A5,STC2,TUBE1,CEBPB
PACHER_TARGETS_OF_IGF1_AND_IGF2_UP	35	7	73.0515	4.59607e-11	ASNS,PHGDH,SLC1A4,SLC7A5,SLC7A11,PSPH,SLC3A2
ONDER_CDH1_TARGETS_1_UP	139	10	23.443	1.02084e-10	ASNS,PHGDH,CHAC1,PCK2,NUPR1,MMP28,STC2,ATF3,MAGED1,METTL7A
GAJATE_RESPONSE_TO_TRABECTEDIN_UP	65	8	41.487	1.07586e-10	ASNS,PCK2,NUPR1,CBS,VLDLR,GARS,ATF3,CARS
ALK_DN.V1_UP	140	10	23.2635	1.09609e-10	ASNS,PSAT1,CHAC1,SLC6A9,PCK2,MTHFD2,SLC7A5,CBS,SLC7A11,STC2
DELPUECH_FOXO3_TARGETS_DN	40	7	61.9336	1.2554e-10	PCK2,NUPR1,MTHFD2,SLC1A4,AARS,SHMT2,IARS
BMI1_DN_MEL18_DN.V1_UP	144	10	22.5713	1.44898e-10	BIRC3,ADM2,PSAT1,SLC6A9,SLC1A4,SLC7A5,SLC7A11,VLDLR,STC2,ATF3
KEGG_AMINOACYL_TRNA_BIOSYNTHESIS	41	7	60.1154	1.50936e-10	WARS,GARS,CARS,MARS,YARS,AARS,IARS
REACTOME_TRNA_AMINOACYLATION	42	7	58.4011	1.80584e-10	WARS,GARS,CARS,MARS,YARS,AARS,IARS
GO_LIGASE_ACTIVITY_FORMING_CARBON_OXYGEN_BONDS	44	7	55.1974	2.54981e-10	WARS,GARS,CARS,MARS,YARS,AARS,IARS
AMUNDSON_RESPONSE_TO_ARSENITE	216	11	16.4014	4.62894e-10	ASNS,SLC1A4,SLC7A5,WARS,STC2,GARS,ATF3,CARS,MARS,CEBPB,IARS
CHAUHAN_RESPONSE_TO_METHOXYESTRADIOL_UP	49	7	48.6348	5.6312e-10	ASNS,SLC7A5,GARS,CARS,SLC3A2,YARS,AARS
TOOKER_GEMCITABINE_RESISTANCE_DN	122	9	23.7865	7.3864e-10	ASNS,PSAT1,SLC7A5,SLC7A11,SLC3A2,MARS,CEBPB,YARS,SHMT2
GO_AMINO_ACID_ACTIVATION	52	7	45.3573	8.69217e-10	WARS,GARS,CARS,MARS,YARS,AARS,IARS
MODULE_133	15	5	142.248	1.80357e-09	GARS,CARS,YARS,AARS,IARS
MODULE_160	15	5	142.248	1.80357e-09	GARS,CARS,YARS,AARS,IARS
GO_SERINE_FAMILY_AMINO_ACID_BIOSYNTHETIC_PROCESS	15	5	142.248	1.80357e-09	PSAT1,PHGDH,CBS,PSPH,SHMT2
CAFFAREL_RESPONSE_TO_THC_24HR_5_DN	59	7	39.2794	2.17074e-09	ASNS,IGFBP5,WARS,SERPINB2,GARS,SLC3A2,SHMT2
MODULE_35	16	5	128.86	2.61575e-09	GARS,CARS,YARS,AARS,IARS
MODULE_110	16	5	128.86	2.61575e-09	GARS,CARS,YARS,AARS,IARS
GSE13306_RA_VS_UNTREATED_MEM_CD4_TCELL_DN	197	10	16.1433	3.0997e-09	ALDH1L2,CHAC1,MTHFD2,SLC1A4,REEP1,VLDLR,GARS,ATF3,SLC3A2,IARS
GSE16522_ANTI_CD3CD28_STIM_VS_UNSTIM_NAIVE_CD8_TCELL_UP	199	10	15.9714	3.41683e-09	ASNS,PHGDH,SLC6A9,MTHFD2,WARS,PSPH,GARS,FAM129A,YARS,SHMT2
GSE6674_ANTI_IGM_VS_ANTI_IGM_AND_CPG_STIM_BCELL_DN	199	10	15.9714	3.41683e-09	ASNS,CHAC1,MTHFD2,SLC7A5,STC2,GARS,MARS,YARS,AARS,TXNRD1
GO_ORGANIC_ACID_METABOLIC_PROCESS	947	18	6.32914	9.18949e-09	ASNS,ALDH1L2,PSAT1,PHGDH,MTHFD2,SLC7A5,WARS,RBP1,CBS,PSPH,GARS,CARS,MARS,FADS2,YARS,AARS,SHMT2,IARS
GO_ALPHA_AMINO_ACID_BIOSYNTHETIC_PROCESS	75	7	30.0378	1.20416e-08	ASNS,PSAT1,PHGDH,MTHFD2,CBS,PSPH,SHMT2
GO_SMALL_MOLECULE_METABOLIC_PROCESS	1757	24	4.7815	1.32906e-08	ASNS,ALDH1L2,PSAT1,PHGDH,PCK2,IGFBP5,MTHFD2,SLC7A5,WARS,RBP1,CBS,PSPH,VLDLR,GARS,ATF3,CARS,MARS,ADCY4,FADS2,YARS,AARS,SHMT2,TXNRD1,IARS
ZHAN_MULTIPLE_MYELOMA_CD1_UP	45	6	44.4049	1.56535e-08	PHGDH,PCK2,RBP1,SLC7A11,STC2,CEBPB
HUANG_FOXA2_TARGETS_UP	45	6	44.4049	1.56535e-08	ASNS,PSAT1,CHAC1,PCK2,SLC7A11,CLIP4
PENG_GLUCOSE_DEPRIVATION_UP	46	6	43.2751	1.79485e-08	ASNS,PCK2,WARS,CARS,CEBPB,AARS
BUYTAERT_PHOTODYNAMIC_THERAPY_STRESS_UP	808	16	6.44894	3.94143e-08	HMOX1,CHAC1,IL13RA2,MTHFD2,SLC1A4,SERPINB2,SLC7A11,PSPH,STC2,PMAIP1,ATF3,SLC3A2,SQSTM1,CEBPB,AARS,TXNRD1
GO_CELLULAR_AMINO_ACID_BIOSYNTHETIC_PROCESS	91	7	24.3183	4.6819e-08	ASNS,PSAT1,PHGDH,MTHFD2,CBS,PSPH,SHMT2
GSE22432_MULTIPOTENT_VS_COMMON_DC_PROGENITOR_UNTREATED_UP	198	9	14.1917	5.17045e-08	PHGDH,MTHFD2,SLC7A5,SERPINB2,GARS,YARS,AARS,SHMT2,IARS
DIRMEIER_LMP1_RESPONSE_LATE_UP	56	6	34.5735	6.04043e-08	HMOX1,MTHFD2,SLC7A5,GARS,CARS,SQSTM1
KEGG_GLYCINE_SERINE_AND_THREONINE_METABOLISM	31	5	54.7448	9.74068e-08	PSAT1,PHGDH,CBS,PSPH,SHMT2
REACTOME_AMINO_ACID_TRANSPORT_ACROSS_THE_PLASMA_MEMBRANE	31	5	54.7448	9.74068e-08	SLC1A4,SLC7A5,SLC7A11,SLC3A2,SLC38A1
GROSS_HYPOXIA_VIA_ELK3_DN	156	8	15.9263	1.17694e-07	ASNS,ALDH1L2,MTHFD2,SLC7A11,VLDLR,ATF3,CARS,CEBPB
CHO_NR4A1_TARGETS	33	5	50.841	1.35271e-07	BIRC3,ASNS,HMOX1,ATF3,SLC3A2
GO_NEUTRAL_AMINO_ACID_TRANSPORT	34	5	49.0921	1.58134e-07	SLC6A9,SLC1A4,SLC7A5,SLC3A2,SLC38A1
HU_GENOTOXIC_DAMAGE_24HR	35	5	47.4675	1.83954e-07	PSAT1,MTHFD2,SLC1A4,SLC7A5,IARS
TSENG_IRS1_TARGETS_UP	113	7	19.2448	2.09228e-07	ASNS,NUPR1,MTHFD2,CARS,SLC3A2,YARS,IARS
HUANG_GATA2_TARGETS_DN	72	6	26.21	2.77253e-07	ASNS,CHAC1,SLC6A9,MTHFD2,SLC1A4,SHMT2
REACTOME_AMINO_ACID_SYNTHESIS_AND_INTERCONVERSION_TRANSAMINATION	16	4	93.8098	3.08089e-07	ASNS,PSAT1,PHGDH,PSPH
GO_SERINE_FAMILY_AMINO_ACID_METABOLIC_PROCESS	41	5	39.5491	4.17308e-07	PSAT1,PHGDH,CBS,PSPH,SHMT2
GO_AMINO_ACID_TRANSMEMBRANE_TRANSPORTER_ACTIVITY	79	6	23.6964	4.8317e-07	SLC6A9,SLC1A4,SLC7A5,SLC7A11,SLC3A2,SLC38A1
GSE9988_ANTI_TREM1_AND_LPS_VS_VEHICLE_TREATED_MONOCYTES_UP	191	8	12.8617	5.53717e-07	ASNS,CHAC1,SLC7A5,GARS,PMAIP1,TUBE1,SLC3A2,TXNRD1
GO_ORGANIC_ACID_BIOSYNTHETIC_PROCESS	264	9	10.4866	5.92131e-07	ASNS,PSAT1,PHGDH,MTHFD2,RBP1,CBS,PSPH,FADS2,SHMT2
GO_SMALL_MOLECULE_BIOSYNTHETIC_PROCESS	437	11	7.81942	6.35211e-07	ASNS,PSAT1,PHGDH,PCK2,MTHFD2,RBP1,CBS,PSPH,ATF3,FADS2,SHMT2
GSE22886_DAY0_VS_DAY1_MONOCYTE_IN_CULTURE_DN	195	8	12.5845	6.47805e-07	BIRC3,SLC7A5,SERPINB2,SLC7A11,GARS,SLC3A2,AARS,TXNRD1
TERAMOTO_OPN_TARGETS_CLUSTER_7	19	4	75.1788	6.50589e-07	PHGDH,MTHFD2,WARS,PSPH
GSE6674_CPG_VS_CPG_AND_ANTI_IGM_STIM_BCELL_DN	198	8	12.3843	7.27048e-07	BIRC3,ASNS,CHAC1,STC2,FAM129A,ATF3,CARS,AARS
GSE28726_NAIVE_CD4_TCELL_VS_NAIVE_VA24NEG_NKTCELL_UP	200	8	12.2543	7.84359e-07	ASNS,PHGDH,PCK2,MTHFD2,CCND2,VLDLR,AARS,SHMT2
GO_ORGANONITROGEN_COMPOUND_BIOSYNTHETIC_PROCESS	1013	16	5.07679	8.32261e-07	ASNS,PSAT1,PHGDH,CHAC1,MTHFD2,WARS,CBS,PSPH,GARS,CARS,MARS,ADCY4,YARS,AARS,SHMT2,IARS
REACTOME_AMINO_ACID_AND_OLIGOPEPTIDE_SLC_TRANSPORTERS	49	5	32.3677	1.03747e-06	SLC1A4,SLC7A5,SLC7A11,SLC3A2,SLC38A1
SMITH_TERT_TARGETS_UP	145	7	14.7646	1.13688e-06	ASNS,IL13RA2,MTHFD2,ATF3,MARS,AARS,SHMT2
REACTOME_TRANSPORT_OF_INORGANIC_CATIONS_ANIONS_AND_AMINO_ACIDS_OLIGOPEPTIDES	93	6	19.8708	1.27135e-06	SLC1A4,SLC7A5,SLC4A5,SLC7A11,SLC3A2,SLC38A1
GO_L_AMINO_ACID_TRANSMEMBRANE_TRANSPORTER_ACTIVITY	54	5	29.0666	1.6958e-06	SLC6A9,SLC1A4,SLC7A5,SLC7A11,SLC38A1
SMID_BREAST_CANCER_RELAPSE_IN_BONE_DN	300	9	9.17515	1.70809e-06	PSAT1,PHGDH,SLC7A5,WARS,SERPINB2,NDUFA4L2,RBP1,PSPH,CLIP4
CHEN_HOXA5_TARGETS_9HR_UP	223	8	10.9305	1.77531e-06	BIRC3,ASNS,CHAC1,STC2,PMAIP1,ATF3,CARS,CEBPB
GO_ALPHA_AMINO_ACID_METABOLIC_PROCESS	227	8	10.7302	2.02689e-06	ASNS,ALDH1L2,PSAT1,PHGDH,MTHFD2,CBS,PSPH,SHMT2
ACEVEDO_FGFR1_TARGETS_IN_PROSTATE_CANCER_MODEL_DN	308	9	8.92595	2.12008e-06	ASNS,PAPPA2,MTHFD2,SLC7A5,CCND2,CCDC80,CBS,REEP1,ACE
GO_CELLULAR_AMIDE_METABOLIC_PROCESS	717	13	5.67432	2.26837e-06	ASNS,ALDH1L2,CHAC1,MTHFD2,WARS,ACE,GARS,CARS,MARS,YARS,AARS,SHMT2,IARS
HALLMARK_APOPTOSIS	161	7	13.216	2.28914e-06	BIRC3,HMOX1,CCND2,CD14,PMAIP1,ATF3,SQSTM1
GO_LIGASE_ACTIVITY	402	10	7.63513	2.36844e-06	BIRC3,ASNS,MTHFD2,WARS,GARS,CARS,MARS,YARS,AARS,IARS
GO_RESPONSE_TO_ENDOPLASMIC_RETICULUM_STRESS	232	8	10.4893	2.38351e-06	ASNS,CHAC1,STC2,PMAIP1,FAM129A,ATF3,CEBPB,AARS
GO_L_AMINO_ACID_TRANSPORT	58	5	26.8763	2.42865e-06	SLC6A9,SLC1A4,SLC7A5,SLC7A11,SLC38A1
LEI_MYB_TARGETS	317	9	8.66089	2.68344e-06	ASNS,HMOX1,NUPR1,SLC7A5,CCND2,SERPINB2,FADS2,CEBPB,TXNRD1
CONCANNON_APOPTOSIS_BY_EPOXOMICIN_UP	237	8	10.2584	2.79215e-06	HMOX1,SLC7A5,WARS,SLC7A11,ATF3,SLC3A2,SQSTM1,CEBPB
MAYBURD_RESPONSE_TO_L663536_UP	27	4	48.9271	2.87997e-06	SLC1A4,SLC7A11,GARS,YARS
SATO_SILENCED_BY_METHYLATION_IN_PANCREATIC_CANCER_1	414	10	7.405	3.07633e-06	NPTX1,BIRC3,ASNS,PSAT1,CHAC1,CLDN5,SLC7A11,PMAIP1,MRC2,RCN3
MCLACHLAN_DENTAL_CARIES_UP	242	8	10.0349	3.25886e-06	BIRC3,MTHFD2,SLC1A4,WARS,CD14,SERPINB2,SLC7A11,REEP1
RODRIGUES_THYROID_CARCINOMA_POORLY_DIFFERENTIATED_UP	628	12	5.92886	3.3866e-06	ASNS,PSAT1,PHGDH,MTHFD2,CBS,SLC7A11,PSPH,NXPH4,STC2,GARS,PMAIP1,CARS
SMID_BREAST_CANCER_BASAL_UP	635	12	5.86044	3.79293e-06	ASNS,PSAT1,PHGDH,CHAC1,SLC7A5,WARS,SERPINB2,NDUFA4L2,RBP1,CBS,VLDLR,CLIP4
GO_TRNA_METABOLIC_PROCESS	176	7	12.0396	4.13096e-06	WARS,GARS,CARS,MARS,YARS,AARS,IARS
GO_ORGANIC_ANION_TRANSMEMBRANE_TRANSPORTER_ACTIVITY	178	7	11.8979	4.45056e-06	SLC6A9,SLC1A4,SLC7A5,SLC4A5,SLC7A11,SLC3A2,SLC38A1
MORF_BUB1B	66	5	23.3519	4.62809e-06	GARS,MARS,YARS,SHMT2,IARS
GO_AMINO_ACID_TRANSMEMBRANE_TRANSPORT	67	5	22.9754	4.98682e-06	SLC6A9,SLC1A4,SLC7A5,SLC7A11,SLC38A1
MODULE_471	10	3	119.248	5.77089e-06	ASNS,CBS,SHMT2
GO_ORGANONITROGEN_COMPOUND_METABOLIC_PROCESS	1781	20	3.67885	5.94745e-06	ASNS,ALDH1L2,PSAT1,PHGDH,HMOX1,CHAC1,MTHFD2,SLC7A5,WARS,CBS,PSPH,ACE,GARS,CARS,MARS,ADCY4,YARS,AARS,SHMT2,IARS
GO_CELLULAR_RESPONSE_TO_EXTERNAL_STIMULUS	263	8	9.20156	6.01202e-06	ASNS,HMOX1,POSTN,IL13RA2,CBS,VLDLR,PMAIP1,ATF3
GO_CELLULAR_RESPONSE_TO_EXTRACELLULAR_STIMULUS	187	7	11.2991	6.15551e-06	ASNS,HMOX1,POSTN,CBS,VLDLR,PMAIP1,ATF3
JECHLINGER_EPITHELIAL_TO_MESENCHYMAL_TRANSITION_UP	71	5	21.5591	6.64538e-06	ASNS,PHGDH,MTHFD2,VLDLR,SLC3A2
GO_AMINO_ACID_TRANSPORT	124	6	14.628	6.79721e-06	SLC6A9,SLC1A4,SLC7A5,SLC7A11,SLC3A2,SLC38A1
BHATI_G2M_ARREST_BY_2METHOXYESTRADIOL_DN	126	6	14.3837	7.45286e-06	PSAT1,NUPR1,MTHFD2,CBS,GARS,AARS
MODULE_528	11	3	104.008	7.91373e-06	ASNS,CBS,SHMT2
DODD_NASOPHARYNGEAL_CARCINOMA_DN	1357	17	4.00844	8.3158e-06	ASNS,PSAT1,PHGDH,POSTN,MTHFD2,SLC7A5,CCND2,CD14,PSPH,GARS,PMAIP1,MARS,KIF20A,NAV3,YARS,SHMT2,IARS
XU_HGF_SIGNALING_NOT_VIA_AKT1_48HR_UP	35	4	36.3175	8.40048e-06	ASNS,HMOX1,PCK2,CARS
GSE9988_ANTI_TREM1_VS_CTRL_TREATED_MONOCYTES_UP	197	7	10.6978	8.65467e-06	PHGDH,CHAC1,PMAIP1,ATF3,SLC3A2,CEBPB,TXNRD1
GSE27434_WT_VS_DNMT1_KO_TREG_DN	197	7	10.6978	8.65467e-06	BIRC3,NUPR1,CD14,SERPINB2,HMGA2,SQSTM1,TXNRD1
GSE9037_CTRL_VS_LPS_4H_STIM_IRAK4_KO_BMDM_DN	198	7	10.6417	8.94522e-06	SLC6A9,NUPR1,IL13RA2,MTHFD2,CCND2,GARS,TXNRD1
GSE42021_TCONV_PLN_VS_TREG_PRECURSORS_THYMUS_DN	198	7	10.6417	8.94522e-06	BIRC3,NUPR1,CCND2,CD14,SERPINB2,CEBPB,TXNRD1
WANG_SMARCE1_TARGETS_UP	278	8	8.68566	9.01163e-06	JDP2,ALDH1L2,POSTN,NUPR1,IGFBP5,WARS,VLDLR,PCDHB10
GSE3691_CONVENTIONAL_VS_PLASMACYTOID_DC_SPLEEN_DN	199	7	10.5861	9.24381e-06	NPTX1,CHAC1,PCK2,SLC7A5,SEMA6C,GARS,MARS
GSE32986_UNSTIM_VS_GMCSF_AND_CURDLAN_LOWDOSE_STIM_DC_UP	199	7	10.5861	9.24381e-06	PHGDH,MTHFD2,SLC7A11,VLDLR,GARS,PMAIP1,AARS
GSE36476_CTRL_VS_TSST_ACT_16H_MEMORY_CD4_TCELL_OLD_DN	200	7	10.5311	9.55063e-06	PSAT1,WARS,GARS,SLC3A2,MARS,AARS,IARS
GSE34392_ST2_KO_VS_WT_DAY8_LCMV_EFFECTOR_CD8_TCELL_DN	200	7	10.5311	9.55063e-06	BIRC3,JDP2,NUPR1,EDNRB,GRAMD1B,ATF3,CEBPB
GSE40274_CTRL_VS_FOXP3_TRANSDUCED_ACTIVATED_CD4_TCELL_UP	200	7	10.5311	9.55063e-06	ASNS,CHAC1,MTHFD2,SLC1A4,MAGED1,KIF20A,AARS
MEL18_DN.V1_UP	140	6	12.8686	1.36228e-05	SLC6A9,SLC1A4,SLC7A5,SLC7A11,VLDLR,STC2
PARK_OSTEOBLAST_DIFFERENTIATION_BY_PHENYLAMIL_UP	13	3	83.6789	1.36438e-05	ALDH1L2,CHAC1,SLC6A9
MORF_EI24	142	6	12.6792	1.47687e-05	GARS,SLC3A2,MARS,YARS,AARS,IARS
GO_ORGANIC_ACID_TRANSMEMBRANE_TRANSPORTER_ACTIVITY	142	6	12.6792	1.47687e-05	SLC6A9,SLC1A4,SLC7A5,SLC7A11,SLC3A2,SLC38A1
HORIUCHI_WTAP_TARGETS_UP	298	8	8.07992	1.49006e-05	BIRC3,HMOX1,EDNRB,LACC1,VLDLR,STC2,ATF3,CEBPB
WIERENGA_STAT5A_TARGETS_UP	215	7	9.76877	1.52675e-05	PSAT1,SLC6A9,IGFBP5,CCND2,CBS,SEMA6C,SQSTM1
GO_AMIDE_BIOSYNTHETIC_PROCESS	499	10	6.09419	1.57259e-05	ASNS,CHAC1,MTHFD2,WARS,GARS,CARS,MARS,YARS,AARS,IARS
ZHANG_RESPONSE_TO_IKK_INHIBITOR_AND_TNF_UP	223	7	9.40205	1.93221e-05	BIRC3,LACC1,ATF3,SQSTM1,NAV3,CEBPB,CLIP4
REACTOME_TRANSMEMBRANE_TRANSPORT_OF_SMALL_MOLECULES	409	9	6.64388	2.07145e-05	HMOX1,SLC6A9,SLC1A4,SLC7A5,SLC4A5,SLC7A11,SLC3A2,ADCY4,SLC38A1
GO_TRNA_BINDING	44	4	28.1523	2.12336e-05	CARS,MARS,YARS,AARS
CREIGHTON_ENDOCRINE_THERAPY_RESISTANCE_1	517	10	5.87321	2.13045e-05	ASNS,JDP2,STMN3,PCK2,STC2,KIF20A,SLC38A1,AARS,METTL7A,SHMT2
VANDESLUIS_COMMD1_TARGETS_GROUP_2_UP	15	3	69.511	2.159e-05	CCND2,NDUFA4L2,STC2
SENESE_HDAC3_TARGETS_DN	526	10	5.76851	2.46811e-05	ASNS,JDP2,PSAT1,PHGDH,STMN3,SLC7A5,CBS,SYNE1,YARS,AARS
GO_SECONDARY_ACTIVE_TRANSMEMBRANE_TRANSPORTER_ACTIVITY	232	7	9.02157	2.49077e-05	SLC6A9,SLC1A4,SLC7A5,SLC4A5,SLC7A11,SLC3A2,SLC38A1
KRASNOSELSKAYA_ILF3_TARGETS_DN	46	4	26.8147	2.53812e-05	ASNS,PCK2,IGFBP5,PSPH
SMIRNOV_CIRCULATING_ENDOTHELIOCYTES_IN_CANCER_UP	158	6	11.3391	2.70302e-05	HMOX1,SLC7A5,CD14,SERPINB2,CEBPB,YARS
SCHLOSSER_MYC_TARGETS_REPRESSED_BY_SERUM	158	6	11.3391	2.70302e-05	MTHFD2,GARS,SLC3A2,CEBPB,YARS,IARS
CUI_TCF21_TARGETS_2_UP	425	9	6.38391	2.79841e-05	PSAT1,PHGDH,POSTN,CCND2,HMGA2,CCDC80,RBP1,RCN3,SLC38A1
CHOP_01	238	7	8.78781	2.93238e-05	NDUFA4L2,GARS,FAM129A,ATF3,CARS,CEBPB,IARS
HANN_RESISTANCE_TO_BCL2_INHIBITOR_DN	48	4	25.5974	3.00942e-05	PCK2,IGFBP5,FAM129A,METTL7A
CEBPDELTA_Q6	239	7	8.74589	3.01189e-05	CCND2,WARS,NDUFA4L2,SLC7A11,ACE,STC2,ATF3
REACTOME_SLC_MEDIATED_TRANSMEMBRANE_TRANSPORT	240	7	8.70872	3.09317e-05	SLC6A9,SLC1A4,SLC7A5,SLC4A5,SLC7A11,SLC3A2,SLC38A1
GO_FOLIC_ACID_METABOLIC_PROCESS	17	3	59.6062	3.2094e-05	ALDH1L2,MTHFD2,SHMT2
GO_RESPONSE_TO_EXTRACELLULAR_STIMULUS	439	9	6.17232	3.6022e-05	ASNS,HMOX1,POSTN,CBS,PSPH,VLDLR,STC2,PMAIP1,ATF3
SHAFFER_IRF4_TARGETS_IN_MYELOMA_VS_MATURE_B_LYMPHOCYTE	101	5	14.8119	3.70604e-05	GARS,ATF3,SLC3A2,MARS,YARS
APPIERTO_RESPONSE_TO_FENRETINIDE_DN	51	4	23.9623	3.83247e-05	ASNS,PSAT1,SLC4A5,SERPINB2
CHEN_LVAD_SUPPORT_OF_FAILING_HEART_UP	102	5	14.6589	3.8858e-05	POSTN,MTHFD2,ATF3,CEBPB,METTL7A
GO_REGULATION_OF_BLOOD_PRESSURE	169	6	10.567	3.94371e-05	ADM2,HMOX1,POSTN,SLC4A5,EDNRB,ACE
GO_ORGANIC_ACID_TRANSMEMBRANE_TRANSPORT	103	5	14.5091	4.07224e-05	SLC6A9,SLC1A4,SLC7A5,SLC7A11,SLC38A1
KEEN_RESPONSE_TO_ROSIGLITAZONE_DN	105	5	14.2187	4.46585e-05	NUPR1,IGFBP5,CD14,RBP1,ATF3
GAUSSMANN_MLL_AF4_FUSION_TARGETS_C_DN	19	3	52.1162	4.54896e-05	ASNS,CHAC1,SLC7A11
SHEDDEN_LUNG_CANCER_POOR_SURVIVAL_A6	455	9	5.94676	4.75274e-05	PSAT1,MTHFD2,SLC7A5,WARS,CBS,STC2,PMAIP1,KIF20A,SLC38A1
LE_EGR2_TARGETS_UP	108	5	13.8043	5.11076e-05	HMGA2,EDNRB,REEP1,ATF3,KIF20A
GO_ORGANIC_ACID_TRANSPORT	261	7	7.98237	5.26524e-05	SLC6A9,SLC1A4,SLC7A5,SLC7A11,ACE,SLC3A2,SLC38A1
GO_TETRAHYDROFOLATE_METABOLIC_PROCESS	20	3	49.0594	5.3374e-05	ALDH1L2,MTHFD2,SHMT2
MODULE_12	358	8	6.67743	5.49069e-05	POSTN,NUPR1,CCND2,CLDN5,CD14,RBP1,EDNRB,FADS2
GSE2706_R848_VS_R848_AND_LPS_8H_STIM_DC_UP	183	6	9.72501	6.14339e-05	PSAT1,HMOX1,LACC1,KIAA1644,FADS2,CLIP4
WONG_ADULT_TISSUE_STEM_MODULE	718	11	4.65323	6.78449e-05	STMN3,PCK2,POSTN,NUPR1,IGFBP5,RBP1,VLDLR,ATF3,MAGED1,SLC3A2,CEBPB
GSE10325_BCELL_VS_MYELOID_UP	187	6	9.51235	6.92495e-05	BIRC3,ASNS,MAGED1,SLC38A1,SHMT2,IARS
MODULE_254	60	4	20.0881	7.2912e-05	BIRC3,NUPR1,CCND2,SERPINB2
CUI_GLUCOSE_DEPRIVATION	60	4	20.0881	7.2912e-05	ASNS,PCK2,SLC3A2,TXNRD1
MARTINEZ_RB1_AND_TP53_TARGETS_UP	600	10	5.02837	7.45278e-05	CCND2,CLDN5,WARS,SERPINB2,HMGA2,ATF3,CARS,MRC2,KIF20A,FADS2
MARKEY_RB1_CHRONIC_LOF_DN	117	5	12.6848	7.48441e-05	HMOX1,NUPR1,CD14,RBP1,SQSTM1
MARTINEZ_TP53_TARGETS_UP	601	10	5.01957	7.5562e-05	CCND2,CLDN5,WARS,SERPINB2,HMGA2,ATF3,CARS,MRC2,KIF20A,FADS2
GSE14000_UNSTIM_VS_4H_LPS_DC_TRANSLATED_RNA_DN	192	6	9.25379	8.01145e-05	BIRC3,NUPR1,MTHFD2,WARS,PMAIP1,ATF3
GSE9988_ANTI_TREM1_VS_VEHICLE_TREATED_MONOCYTES_UP	192	6	9.25379	8.01145e-05	CHAC1,GARS,SLC3A2,CEBPB,TXNRD1,IARS
GO_VITAMIN_METABOLIC_PROCESS	119	5	12.4634	8.11128e-05	ALDH1L2,PSAT1,MTHFD2,RBP1,SHMT2
GSE19401_UNSTIM_VS_RETINOIC_ACID_STIM_FOLLICULAR_DC_DN	194	6	9.15443	8.48234e-05	SLC7A5,RBP1,PSPH,ATF3,MARS,SHMT2
SENESE_HDAC3_TARGETS_UP	493	9	5.47143	8.78441e-05	BIRC3,IGFBP5,CCND2,HMGA2,SLC7A11,PMAIP1,ATF3,SQSTM1,NAV3
GSE46242_TH1_VS_ANERGIC_TH1_CD4_TCELL_WITH_EGR2_DELETED_UP	196	6	9.05722	8.97504e-05	BIRC3,SLC7A5,WARS,PMAIP1,SLC3A2,DPY19L3
GSE16522_ANTI_CD3CD28_STIM_VS_UNSTIM_MEMORY_CD8_TCELL_UP	197	6	9.00939	9.22979e-05	ASNS,SLC6A9,SLC38A1,YARS,AARS,IARS
GSE22140_HEALTHY_VS_ARTHRITIC_GERMFREE_MOUSE_CD4_TCELL_DN	197	6	9.00939	9.22979e-05	HMOX1,SERPINB2,SLC7A11,PMAIP1,SLC3A2,TXNRD1
GSE19401_NAIVE_VS_IMMUNIZED_MOUSE_PLN_FOLLICULAR_DC_UP	197	6	9.00939	9.22979e-05	HMOX1,SLC7A5,SERPINB2,ATF3,FADS2,TXNRD1
GSE36826_NORMAL_VS_STAPH_AUREUS_INF_SKIN_UP	197	6	9.00939	9.22979e-05	BIRC3,SLC7A11,SLC3A2,YARS,AARS,TXNRD1
GSE42021_TREG_PLN_VS_CD24INT_TREG_THYMUS_UP	197	6	9.00939	9.22979e-05	BIRC3,NUPR1,CCND2,CD14,SERPINB2,TXNRD1
GSE42021_CD24HI_TREG_VS_CD24HI_TCONV_THYMUS_DN	197	6	9.00939	9.22979e-05	BIRC3,HMOX1,CCND2,CD14,SERPINB2,TXNRD1
GSE45365_NK_CELL_VS_CD11B_DC_DN	197	6	9.00939	9.22979e-05	BIRC3,JDP2,SLC7A5,CD14,SLC3A2,CEBPB
REACTOME_BASIGIN_INTERACTIONS	24	3	39.7398	9.37531e-05	SLC7A5,SLC7A11,SLC3A2
GO_ORGANIC_ANION_TRANSPORT	387	8	6.15877	9.44522e-05	SLC6A9,SLC1A4,SLC7A5,SLC4A5,SLC7A11,ACE,SLC3A2,SLC38A1
GSE17721_CTRL_VS_LPS_2H_BMDC_DN	198	6	8.96207	9.49026e-05	BIRC3,POSTN,SEMA6C,FAM129A,ATF3,SQSTM1
GSE3039_CD4_TCELL_VS_B2_BCELL_DN	198	6	8.96207	9.49026e-05	CCND2,WARS,SERPINB2,CCDC80,YARS,TXNRD1
GSE5679_CTRL_VS_RARA_AGONIST_AM580_TREATED_DC_UP	198	6	8.96207	9.49026e-05	MTHFD2,CCND2,WARS,TUBE1,MARS,SHMT2
GSE23308_WT_VS_MINERALCORTICOID_REC_KO_MACROPHAGE_DN	198	6	8.96207	9.49026e-05	BIRC3,ASNS,JDP2,PHGDH,SLC7A11,GARS
GSE21063_CTRL_VS_ANTI_IGM_STIM_BCELL_NFATC1_KO_16H_DN	198	6	8.96207	9.49026e-05	SLC1A4,GARS,FAM129A,SYNE1,SLC3A2,IARS
GSE42021_TREG_PLN_VS_CD24HI_TREG_THYMUS_UP	198	6	8.96207	9.49026e-05	BIRC3,NUPR1,CD14,SQSTM1,CEBPB,TXNRD1
GSE46606_IRF4HIGH_VS_IRF4MID_CD40L_IL2_IL5_DAY3_STIMULATED_BCELL_DN	198	6	8.96207	9.49026e-05	PAPPA2,POSTN,CCND2,WARS,EDNRB,ATF3
GSE14769_UNSTIM_VS_60MIN_LPS_BMDM_DN	199	6	8.91464	9.75656e-05	BIRC3,NUPR1,CD14,ATF3,SQSTM1,CEBPB
GSE24634_IL4_VS_CTRL_TREATED_NAIVE_CD4_TCELL_DAY10_DN	199	6	8.91464	9.75656e-05	PHGDH,WARS,CARS,CEBPB,YARS,TXNRD1
GSE360_T_GONDII_VS_M_TUBERCULOSIS_DC_UP	199	6	8.91464	9.75656e-05	ASNS,IGFBP5,CBS,GARS,MARS,AARS
GSE360_L_DONOVANI_VS_M_TUBERCULOSIS_MAC_UP	199	6	8.91464	9.75656e-05	ASNS,HMOX1,NUPR1,GARS,AARS,TXNRD1
GSE360_HIGH_DOSE_B_MALAYI_VS_M_TUBERCULOSIS_MAC_UP	199	6	8.91464	9.75656e-05	PCK2,GARS,MARS,YARS,SHMT2,TXNRD1
GSE411_WT_VS_SOCS3_KO_MACROPHAGE_IL6_STIM_400MIN_UP	199	6	8.91464	9.75656e-05	ASNS,LACC1,FAM129A,SLC3A2,SQSTM1,CEBPB
GSE2128_CTRL_VS_MIMETOPE_NEGATIVE_SELECTION_DP_THYMOCYTE_NOD_UP	199	6	8.91464	9.75656e-05	PCK2,CD14,SLC7A11,ATF3,RCN3,SLC38A1
GSE5679_CTRL_VS_PPARG_LIGAND_ROSIGLITAZONE_TREATED_DC_UP	199	6	8.91464	9.75656e-05	PSAT1,MTHFD2,GARS,TUBE1,MARS,SHMT2
GSE9316_IL6_KO_VS_IFNG_KO_INVIVO_EXPANDED_CD4_TCELL_DN	199	6	8.91464	9.75656e-05	PSAT1,WARS,CD14,ATF3,TXNRD1,IARS
GSE21927_SPLEEN_C57BL6_VS_EL4_TUMOR_BALBC_MONOCYTES_DN	199	6	8.91464	9.75656e-05	PSAT1,PHGDH,SLC7A5,CCND2,WARS,PMAIP1
GSE23308_WT_VS_MINERALCORTICOID_REC_KO_MACROPHAGE_CORTICOSTERONE_TREATED_DN	199	6	8.91464	9.75656e-05	PHGDH,NUPR1,IGFBP5,GARS,YARS,IARS
GSE29949_CD8_POS_DC_SPLEEN_VS_MONOCYTE_BONE_MARROW_DN	199	6	8.91464	9.75656e-05	ASNS,GRAMD1B,CARS,SYNE1,CEBPB,SHMT2
GSE39152_CD103_NEG_VS_POS_MEMORY_CD8_TCELL_DN	199	6	8.91464	9.75656e-05	ASNS,HMOX1,NUPR1,SLC3A2,TXNRD1,IARS
