# Supplementary material for: Oxidized phospholipids regulate amino acid metabolism through MTHFD2 to facilitate nucleotide release in endothelial cells
Source: Nat Commun. 2018 Jun 12;9:2292. doi: 10.1038/s41467-018-04602-0 (PMC5997752; doi:10.1038/s41467-018-04602-0)
Supplement: Supplementary file 6 — Supplementary Data 4 [file 41467_2018_4602_MOESM6_ESM.xlsx]

## Sheet: Tabelle1
Gene	metabolonID	metabolonDescription	SNPs	p-value
SETX	M33801	ADpSGEGDFXAEGGGVR*	rs612169	9.658e-14
SETX	M33801	ADpSGEGDFXAEGGGVR*	rs644234	1.429e-13
SETX	M33801	ADpSGEGDFXAEGGGVR*	rs643434	1.445e-13
SETX	M33801	ADpSGEGDFXAEGGGVR*	rs514659	2.634e-13
SETX	M33801	ADpSGEGDFXAEGGGVR*	rs545971	3.327e-13
SETX	M33801	ADpSGEGDFXAEGGGVR*	rs674302	3.559e-13
SETX	M33801	ADpSGEGDFXAEGGGVR*	rs529565	5.414e-13
SETX	M33801	ADpSGEGDFXAEGGGVR*	rs505922	7.761e-13
SETX	M33801	ADpSGEGDFXAEGGGVR*	rs630014	3.53e-09
AARS	M01299	tyrosine	rs9936903	1.892e-08
AARS	M02734	gamma-glutamyltyrosine	rs9936903	9.213e-08
SETX	M32740	X-11423	rs643434	1.53e-07
SETX	M32740	X-11423	rs644234	1.542e-07
SETX	M32740	X-11423	rs529565	6.019e-07
SETX	M32740	X-11423	rs505922	6.023e-07
SETX	M32740	X-11423	rs674302	6.053e-07
SETX	M32740	X-11423	rs545971	6.126e-07
SETX	M32740	X-11423	rs514659	6.557e-07
SETX	M32740	X-11423	rs612169	7.992e-07
GJA4	M32654	3-dehydrocarnitine*	rs4609395	2.188e-06
SETX	M33084	ADSGEGDFXAEGGGVR*	rs529565	2.75e-06
SETX	M33084	ADSGEGDFXAEGGGVR*	rs505922	3.475e-06
SETX	M33084	ADSGEGDFXAEGGGVR*	rs514659	3.866e-06
SETX	M33084	ADSGEGDFXAEGGGVR*	rs612169	3.958e-06
SETX	M33084	ADSGEGDFXAEGGGVR*	rs545971	4.349e-06
SETX	M33084	ADSGEGDFXAEGGGVR*	rs674302	4.384e-06
SETX	M32808	X-11491	rs514659	6.606e-06
SETX	M32808	X-11491	rs545971	6.661e-06
SETX	M32808	X-11491	rs674302	6.993e-06
SETX	M32808	X-11491	rs612169	7.985e-06
GJA4	M32654	3-dehydrocarnitine*	rs4604660	1.197e-05
GJA4	M32654	3-dehydrocarnitine*	rs12725080	1.198e-05
SETX	M33801	ADpSGEGDFXAEGGGVR*	rs568203	1.24e-05
SETX	M32808	X-11491	rs505922	1.25e-05
SETX	M32808	X-11491	rs529565	1.255e-05
CBS	M32709	X-03056	rs4819388	1.395e-05
MTHFD2	M27710	N-acetylglycine	rs10174907	1.426e-05
SETX	M32808	X-11491	rs500498	1.599e-05
CBS	M32709	X-03056	rs7278940	1.619e-05
GJA4	M32654	3-dehydrocarnitine*	rs12058538	1.915e-05
GJA4	M32654	3-dehydrocarnitine*	rs7526321	1.915e-05
SETX	M32808	X-11491	rs644234	2.098e-05
SETX	M32808	X-11491	rs643434	2.099e-05
HERPUD1	M32616	X-11299	rs7185970	2.221e-05
CBS	M32709	X-03056	rs4818887	2.23e-05
PPARD	M37202	4-androsten-3beta,17beta-diol disulfate 1*	rs6938138	2.353e-05
SETX	M33084	ADSGEGDFXAEGGGVR*	rs644234	2.515e-05
SETX	M33084	ADSGEGDFXAEGGGVR*	rs643434	2.528e-05
LYST	M22030	2-hydroxyisobutyrate	rs12136895	2.545e-05
SPRED2	M01645	laurate (12:0)	rs1344891	2.568e-05
PCK2	M15365	glycerol 3-phosphate (G3P)	rs1062230	2.598e-05
THG1L	M27273	X-10506	rs1052926	2.781e-05
GLDC	M32338	glycine	rs2297442	2.94e-05
HSPA13	M32489	caproate (6:0)	rs1297269	2.954e-05
NPC1	M31555	pyridoxate	rs13381663	3.706e-05
HERPUD1	M32616	X-11299	rs16960143	3.836e-05
CBS	M33587	eicosenoate (20:1n9 or 11)	rs3746963	4.016e-05
SPRED2	M01645	laurate (12:0)	rs7562559	4.153e-05
SPRED2	M01645	laurate (12:0)	rs1437461	4.153e-05
CBS	M32709	X-03056	rs3746963	4.853e-05
ARMC9	M01558	4-acetamidobutanoate	rs6734039	4.942e-05
ARMC9	M01558	4-acetamidobutanoate	rs12988432	4.948e-05
SHMT2	M36776	7-alpha-hydroxy-3-oxo-4-cholestenoate (7-Hoca)	rs11172833	4.95e-05
LTA4H	M01302	methionine	rs12579455	4.992e-05
TRIB3	M34350	X-12740	rs6051957	5.237e-05
STC2	M32867	X-11550	rs11134792	5.435e-05
FOSL2	M33230	1-palmitoleoylglycerophosphocholine*	rs1881253	5.695e-05
SETX	M02132	citrulline	rs612169	5.912e-05
NAV3	M12017	3-methoxytyrosine	rs10746103	5.95e-05
SETX	M32740	X-11423	rs500498	6.334e-05
SETX	M02132	citrulline	rs545971	6.347e-05
SETX	M02132	citrulline	rs674302	6.389e-05
STC2	M32867	X-11550	rs11134793	6.656e-05
SETX	M02132	citrulline	rs514659	6.861e-05
TUFT1	M33422	gamma-glutamylphenylalanine	rs10888547	6.878e-05
FOSL2	M33960	1-oleoylglycerophosphocholine	rs1881253	6.987e-05
GJA4	M34481	X-12798	rs12058538	6.993e-05
GJA4	M34481	X-12798	rs7526321	6.993e-05
HERPUD1	M32616	X-11299	rs7203177	7.108e-05
ARMC9	M22649	X-09108	rs12988432	7.306e-05
CBS	M33587	eicosenoate (20:1n9 or 11)	rs4818887	7.345e-05
ARMC9	M22649	X-09108	rs6734039	7.363e-05
KIF3A	M18369	gamma-glutamylleucine	rs2243211	7.501e-05
KIF3A	M18369	gamma-glutamylleucine	rs2243210	7.567e-05
SETX	M36230	X-14304	rs643434	7.674e-05
SETX	M36230	X-14304	rs644234	7.704e-05
FOSL2	M33230	1-palmitoleoylglycerophosphocholine*	rs13017378	7.81e-05
SETX	M31548	DSGEGDFXAEGGGVR*	rs529565	7.877e-05
EPAS1	M00054	tryptophan	rs1530628	8.133e-05
ANKRD46	M32838	X-11521	rs7007746	8.296e-05
SPRED2	M27718	creatine	rs2118304	8.314e-05
DAPK1	M01712	cortisol	rs11142238	8.326e-05
TRIB3	M36673	X-14745	rs2295495	8.431e-05
EPAS1	M27710	N-acetylglycine	rs1530628	8.685e-05
SETX	M31548	DSGEGDFXAEGGGVR*	rs612169	8.814e-05
HERPUD1	M33163	X-11818	rs16960143	8.862e-05
CBS	M33587	eicosenoate (20:1n9 or 11)	rs4819388	9.043e-05
NFIL3	M03127	hypoxanthine	rs1152759	9.133e-05
SETX	M31548	DSGEGDFXAEGGGVR*	rs514659	9.2e-05
TUFT1	M34420	bradykinin, des-arg(9)	rs10788864	9.293e-05
FOSL2	M33230	1-palmitoleoylglycerophosphocholine*	rs11127162	9.389e-05
SETX	M31548	DSGEGDFXAEGGGVR*	rs545971	9.434e-05
EPAS1	M27710	N-acetylglycine	rs2197698	9.445e-05
FOSL2	M33821	1-eicosatrienoylglycerophosphocholine*	rs11127164	9.485e-05
SETX	M31548	DSGEGDFXAEGGGVR*	rs674302	9.523e-05
SETX	M31548	DSGEGDFXAEGGGVR*	rs505922	9.585e-05
SLC7A5	M33961	1-stearoylglycerophosphocholine	rs4785651	9.749e-05
EPAS1	M27710	N-acetylglycine	rs1530627	9.764e-05
