# Supplementary material for: Oxidized phospholipids regulate amino acid metabolism through MTHFD2 to facilitate nucleotide release in endothelial cells
Source: Nat Commun. 2018 Jun 12;9:2292. doi: 10.1038/s41467-018-04602-0 (PMC5997752; doi:10.1038/s41467-018-04602-0)
Supplement: Supplementary file 7 — Supplementary Data 5 [file 41467_2018_4602_MOESM7_ESM.xlsx]

## Sheet: Tabelle1
GeneSymbol	TxStart	TxEnd	markername	Chr	Pos	effect_allele	noneffect_allele	effect_allele_freq	median_info	model	beta	se_dgc	p_dgc	het_pvalue	n_studies
SORT1	109852187	109935979	rs7528419	1	109817192	G	A	0.209375	0.991	FIXED	-0.163934	0.0304144	7.05e-08	0.061426	42
SLC7A1	30083550	30169825	rs9551751	13	30412337	G	A	0.136885	0.996	FIXED	-0.209708	0.0390608	7.93e-08	5.58e-05	43
SORT1	109852187	109935979	rs12740374	1	109817590	T	G	0.208277	0.995	FIXED	-0.161101	0.030475	1.25e-07	0.062985	42
SORT1	109852187	109935979	rs4970834	1	109814880	T	C	0.173789	1	FIXED	-0.18001	0.0368638	1.04e-06	0.295067	42
SORT1	109852187	109935979	rs611917	1	109815252	G	A	0.289444	0.966	FIXED	-0.112315	0.0233097	1.45e-06	0.637808	42
SHMT2	57623827	57628718	rs11172113	12	57527283	C	T	0.395468	0.987035	FIXED	0.085422	0.0178577	1.72e-06	0.738253	42
DDIT3	57910370	57914300	rs11172113	12	57527283	C	T	0.395468	0.987035	FIXED	0.085422	0.0178577	1.72e-06	0.738253	42
MARS	57881735	57910438	rs11172113	12	57527283	C	T	0.395468	0.987035	FIXED	0.085422	0.0178577	1.72e-06	0.738253	42
CEBPB	48807119	48809227	rs6095611	20	48315902	A	G	0.504537	0.91863	FIXED	0.06742	0.0151964	9.14e-06	0.52361	43
CEBPB	48807119	48809227	rs1034056	20	48332427	G	A	0.536937	0.99065	FIXED	0.060811	0.0139906	1.38e-05	0.567366	43
TUFT1	151512780	151556059	chr1:151745545:D	1	151745545	D	I	0.141217	0.985	FIXED	-0.193706	0.0447193	1.48e-05	0.72473	43
CEBPB	48807119	48809227	rs6067199	20	48334225	G	A	0.539825	0.98813	FIXED	0.060393	0.0139947	1.59e-05	0.6338	43
CEBPB	48807119	48809227	chr20:48333314:D	20	48333314	D	I	0.521043	0.96	FIXED	0.062754	0.0145699	1.65e-05	0.642849	43
FOXO1	41129800	41240734	rs9594389	13	40713218	C	A	0.442323	0.98612	FIXED	0.072833	0.016922	1.68e-05	0.210132	41
CEBPB	48807119	48809227	rs6091031	20	48332984	G	A	0.539837	0.99	FIXED	0.05999	0.013969	1.75e-05	0.622457	43
FOXO1	41129800	41240734	rs7323896	13	40712310	A	G	0.44181	0.98483	FIXED	0.072834	0.0169723	1.78e-05	0.22038	41
CEBPB	48807119	48809227	rs6067190	20	48323170	C	T	0.537364	0.997	FIXED	0.059378	0.0139104	1.97e-05	0.518207	43
CEBPB	48807119	48809227	rs913477	20	48318306	C	T	0.541268	1	FIXED	0.058953	0.0138396	2.05e-05	0.571086	43
CEBPB	48807119	48809227	rs3787327	20	48329184	A	G	0.540669	0.99676	FIXED	0.059026	0.0138991	2.17e-05	0.606225	43
CEBPB	48807119	48809227	rs12329570	20	48330030	C	G	0.534592	0.988	FIXED	0.05958	0.0140388	2.2e-05	0.622685	43
CEBPB	48807119	48809227	rs6063420	20	48308703	G	A	0.544304	0.99451	FIXED	0.058604	0.0138406	2.29e-05	0.559936	43
CEBPB	48807119	48809227	rs6095616	20	48334655	A	G	0.538781	0.979	FIXED	0.059771	0.0141179	2.3e-05	0.630979	43
GJA4	35258598	35261348	rs1336624	1	35162739	C	T	0.418952	0.99978	FIXED	0.071628	0.0169641	2.42e-05	0.638618	43
CEBPB	48807119	48809227	rs6095618	20	48334998	G	A	0.537819	0.984	FIXED	0.059447	0.0140943	2.47e-05	0.623413	43
CEBPB	48807119	48809227	rs13044772	20	48324298	T	G	0.54057	0.998	FIXED	0.058307	0.0138683	2.62e-05	0.595747	43
TUFT1	151512780	151556059	rs6683364	1	151746202	A	T	0.136468	0.997	FIXED	-0.191553	0.0457865	2.87e-05	0.590449	43
CEBPB	48807119	48809227	rs6067189	20	48321285	C	A	0.517294	0.932	FIXED	0.0624	0.0149366	2.95e-05	0.580281	43
CEBPB	48807119	48809227	rs6012717	20	48319665	T	G	0.54122	0.998	FIXED	0.057716	0.0138611	3.13e-05	0.590922	43
CEBPB	48807119	48809227	rs4810977	20	48316245	A	G	0.543247	0.999	FIXED	0.057327	0.0138242	3.37e-05	0.575645	43
CEBPB	48807119	48809227	rs913476	20	48318014	T	C	0.543023	0.998	FIXED	0.057333	0.0138314	3.4e-05	0.57496	43
TUFT1	151512780	151556059	rs3790514	1	151744168	C	T	0.136521	0.999	FIXED	-0.189263	0.0457628	3.54e-05	0.650095	43
CEBPB	48807119	48809227	rs4809751	20	48309807	T	C	0.543133	0.999	FIXED	0.057097	0.013818	3.6e-05	0.573242	43
CEBPB	48807119	48809227	rs1927781	20	48325755	A	G	0.542943	0.99873	FIXED	0.05719	0.0138468	3.62e-05	0.622775	43
TUFT1	151512780	151556059	rs1054479	1	151746079	T	A	0.136158	0.995	FIXED	-0.189511	0.0458933	3.64e-05	0.613672	43
CEBPB	48807119	48809227	rs4809753	20	48324857	T	A	0.542672	0.999	FIXED	0.057159	0.0138478	3.66e-05	0.619731	43
CEBPB	48807119	48809227	rs4810980	20	48316464	T	G	0.543253	0.99894	FIXED	0.057059	0.0138252	3.67e-05	0.569709	43
CEBPB	48807119	48809227	rs4810979	20	48316447	G	C	0.543254	0.99893	FIXED	0.05706	0.0138262	3.68e-05	0.569676	43
CEBPB	48807119	48809227	rs13043361	20	48322497	G	A	0.542754	0.998	FIXED	0.057025	0.0138437	3.8e-05	0.615699	43
CEBPB	48807119	48809227	rs35854666	20	48335519	A	C	0.539729	0.98148	FIXED	0.058091	0.0141077	3.83e-05	0.607765	43
TUFT1	151512780	151556059	rs7542898	1	151753622	G	T	0.13674	0.99167	FIXED	-0.189025	0.0459149	3.84e-05	0.602822	43
CEBPB	48807119	48809227	rs74462005	20	48325486	T	G	0.543172	0.998	FIXED	0.056967	0.0138457	3.88e-05	0.612189	43
CEBPB	48807119	48809227	rs4810981	20	48327245	G	A	0.54223	0.997	FIXED	0.057041	0.0138714	3.92e-05	0.60635	43
FOXO1	41129800	41240734	rs7328137	13	40712606	C	T	0.444789	0.9854	FIXED	0.068789	0.0167618	4.06e-05	0.181439	41
FOXO1	41129800	41240734	rs9603683	13	40710458	C	G	0.44537	0.967	FIXED	0.068871	0.0169241	4.71e-05	0.182034	41
FOSL1	65659691	65667997	rs12419237	11	65365077	C	T	0.273632	0.89182	FIXED	-0.105802	0.0260337	4.82e-05	0.000592	41
CDC42EP2	65082288	65089900	rs12419237	11	65365077	C	T	0.273632	0.89182	FIXED	-0.105802	0.0260337	4.82e-05	0.000592	41
PIK3C2B	204391757	204459474	rs16854023	1	204551830	C	T	0.207527	1	FIXED	-0.120608	0.0299265	5.57e-05	0.000399	43
CEBPB	48807119	48809227	rs6012716	20	48319572	T	G	0.542388	0.972	FIXED	0.056618	0.0140697	5.72e-05	0.565194	43
FOXO1	41129800	41240734	rs9549073	13	40710693	A	C	0.4445	0.959	FIXED	0.068281	0.016996	5.88e-05	0.192336	41
WASF3	27131839	27263082	rs9512451	13	27499930	A	G	0.196993	0.9074	FIXED	-0.160019	0.040204	6.89e-05	0.436415	39
TUFT1	151512780	151556059	rs6673917	1	151753108	T	C	0.131271	0.99092	FIXED	-0.188362	0.0473703	7e-05	0.460885	43
MET	116312458	116438440	rs184476308	7	115930494	T	C	0.138649	0.84378	FIXED	-0.203697	0.0512755	7.11e-05	0.7116	43
TUFT1	151512780	151556059	rs6681093	1	151755284	G	C	0.14163	0.988	FIXED	-0.176618	0.0445426	7.34e-05	0.698109	43
SLC47A1	19437166	19482346	rs7502682	17	19295450	T	G	0.671952	0.98744	FIXED	-0.058935	0.0148801	7.47e-05	0.832682	40
SLC47A1	19437166	19482346	rs2233072	17	19281828	G	T	0.672058	0.98674	FIXED	-0.058847	0.0148749	7.62e-05	0.793617	40
ARHGEF2	155916629	155948336	rs822509	1	155850811	A	G	0.605677	0.9986	FIXED	0.053874	0.0136496	7.92e-05	0.834094	43
ARHGEF2	155916629	155948336	rs822505	1	155846528	T	C	0.604833	0.9877	FIXED	0.054065	0.0137204	8.13e-05	0.858425	43
ARHGEF2	155916629	155948336	rs2948071	1	155750365	C	T	0.581187	0.93516	FIXED	0.056056	0.0142309	8.18e-05	0.757609	43
GARS	30634180	30673648	rs142982771	7	30378951	C	T	0.086658	0.738	FIXED	0.288965	0.0734019	8.26e-05	0.80148	36
PPARD	35310334	35395968	rs10484578	6	35246319	G	A	0.608841	0.95501	FIXED	-0.054263	0.0137954	8.37e-05	0.291479	43
GARS	30634180	30673648	chr7:30374648:I	7	30374648	I	D	0.087727	0.741	FIXED	0.282022	0.0717113	8.4e-05	0.77934	36
MET	116312458	116438440	rs6951060	7	115921044	G	T	0.284191	0.99866	FIXED	0.088935	0.0226513	8.63e-05	2.11e-07	43
SLC47A1	19437166	19482346	rs973649	17	19292068	G	A	0.672926	0.995	FIXED	-0.058147	0.014841	8.93e-05	0.842292	40
GARS	30634180	30673648	rs35295500	7	30351332	C	T	0.088316	0.743	FIXED	0.280734	0.0717883	9.21e-05	0.800885	37
SLC47A1	19437166	19482346	rs973650	17	19291785	G	A	0.672069	0.99141	FIXED	-0.058058	0.0148585	9.33e-05	0.827582	40
ARHGEF2	155916629	155948336	rs822527	1	155738053	G	A	0.598513	0.98493	FIXED	0.053341	0.0136567	9.39e-05	0.888013	43
RCOR3	211433288	211489725	rs7540109	1	211907669	C	G	0.047308	0.80479	FIXED	-0.608168	0.155759	9.44e-05	0.971223	34
FOXO1	41129800	41240734	rs4943737	13	40733531	A	T	0.437986	0.971225	FIXED	0.064588	0.0165584	9.59e-05	0.62132	42
